# Supplementary material for: Mapping the GlycoRNA-Protein Interactome: Insights into Glycan-Modified RNA Binding Partners and Functional Networks
Source: Research Square preprint supplement (doi:10.21203/rs.3.rs-7628445/v1), 2025-09-22
Supplement: Supplementary file 1 [file 84b4351e2799251279471a61.pdf]

# Mapping the GlycoRNA-Protein Interactome: Insights into Glycan-Modified RNA Binding Partners and Functional Networks

Ioannis Isaoglou<sup>1†</sup>, Jing Kai<sup>1†</sup>, Jasmeen S. Merzaban<sup>1\*</sup>

<sup>1</sup> Bioscience Program, Biological and Environmental Science and Engineering Division, King Abdullah University of Science and Technology (KAUST), Thuwal, Saudi Arabia

† Authors contributed equally

\* Corresponding author, [jasmeen.merzaban@kaust.edu.sa](mailto:jasmeen.merzaban@kaust.edu.sa)

14 **Supplementary Figures**

15

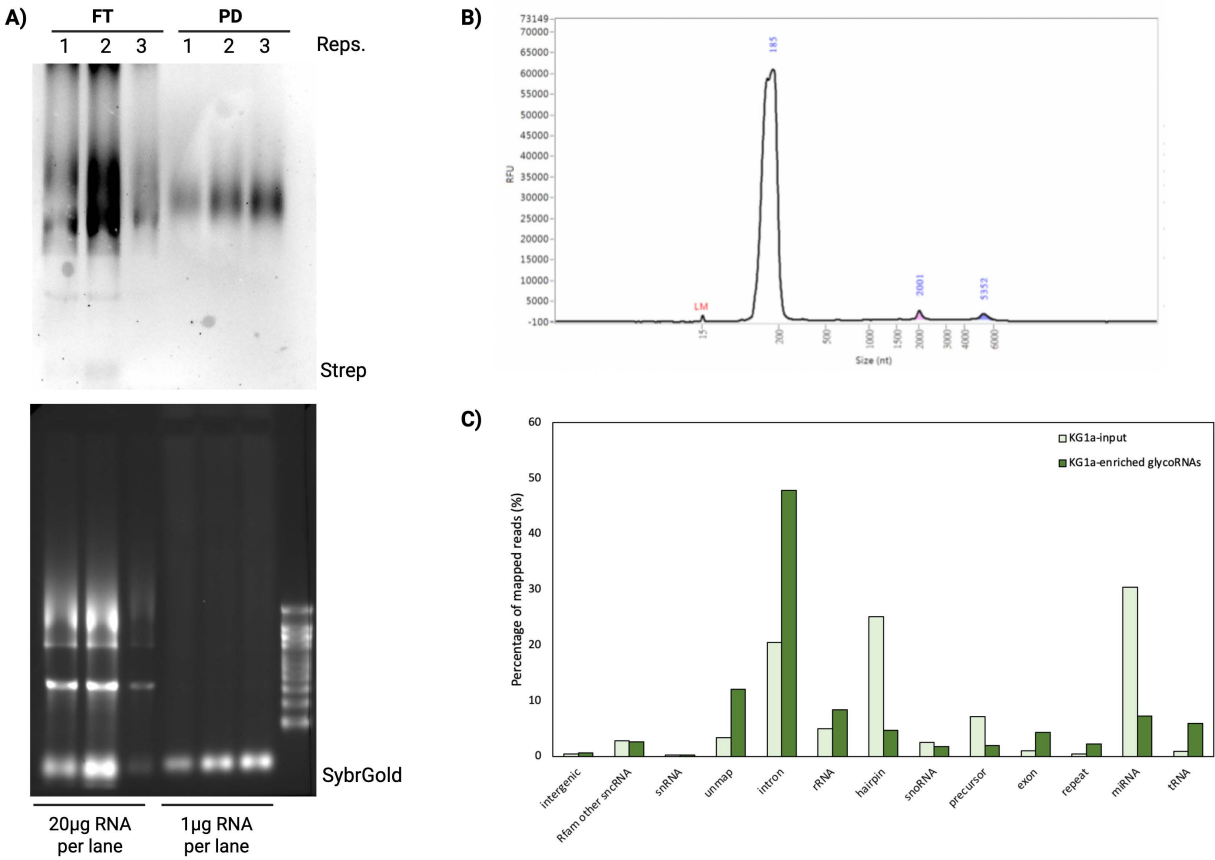

16

17 **Supplementary Figure S1. rPAL-labeled (sialo-)glycoRNAs in KG1a cells are primarily small**  
18 **non-coding RNAs. (A)** rPAL-labelled glycoRNAs from KG1a cells were enriched by streptavidin-  
19 beads and both flow-through (FT) and pull-down (PD) samples were analyzed by RNA blotting.  
20 Pull-down samples showed strong enrichment in small RNA regions (<200nt). Reps, replicates;  
21 Strep, streptavidin-IR800. **(B)** Representative Bioanalyzer trace showing size distribution of  
22 purified pull-down glycoRNAs, with prominent peak at ~185 nt. **(C)** Classification of small RNA  
23 sequencing reads from rPAL-enriched glycoRNAs compared to input control (<200nt  
24 fractionated total RNA). Data represent the average of four biological replicates (n=4).

25

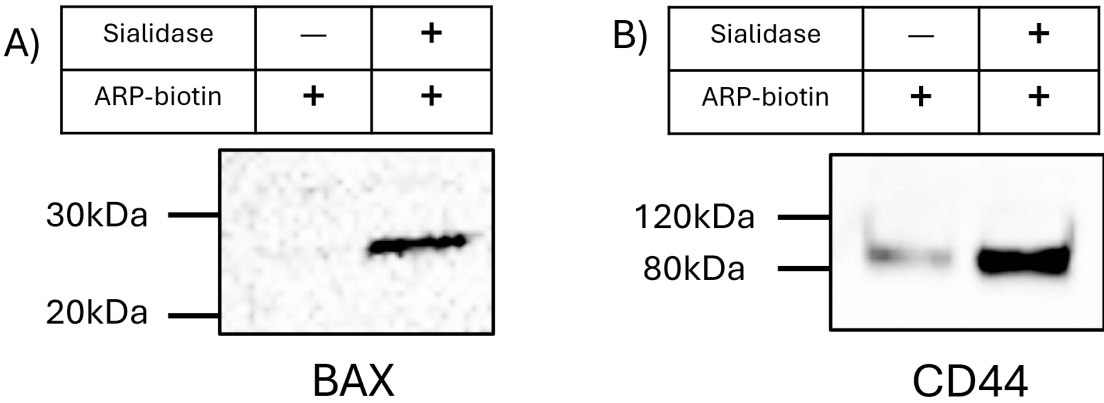

27

28 **Supplementary Figure 2. Western blot validation of proteomics data.** Pull-downs of KG1a cell  
29 lysate using glycoRNAs, with and without sialidase treatment, were analyzed by Western blot.  
30 **(A)** BAX was detected only in the untreated sample and was lost upon sialidase treatment,  
31 confirming sialic acid-dependent interaction. **(B)** CD44 was present in both untreated and  
32 treated pull-downs but showed higher abundance in untreated samples, consistent with  
33 proteomics data (protein score 464, 15 peptides vs. 62, 1 peptide in treated sample). Proteins  
34 identified with a single peptide in the sialidase-treated sample were excluded from  
35 enrichment analyses presented in **Figures 3-6**.

36

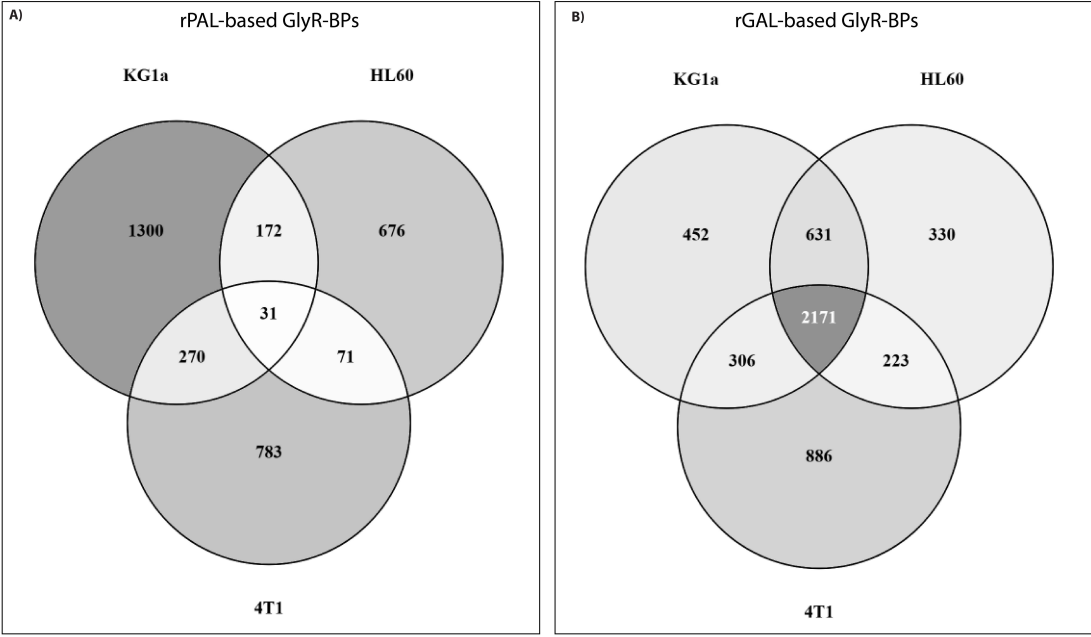

38

39 **Supplementary Figure 3. Venn diagram analysis of glycoRNA-binding proteins.** Comparison  
40 of rPAL-based (A) and rGAL-based (B) glycoRNA-binding protein datasets across species. All  
41 Uniprot IDs were converted to gene names to allow cross-species comparison.

42

43

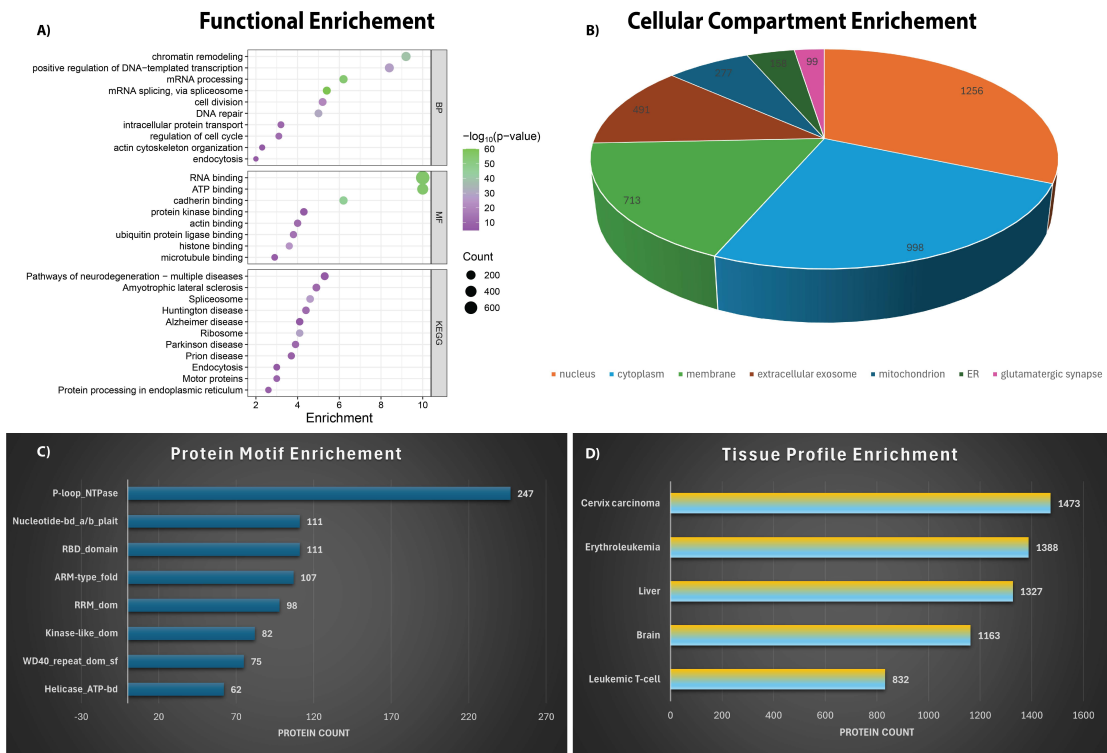

46 **Supplementary Figure 4. Functional enrichment of common rGAL-based glycoRNA-binding**  
47 **proteins across three cell lines. (A)** Gene Ontology (GO) enrichment of Biological Process (BP),  
48 Molecular Function (MF), and KEGG categories for shared rGAL-based glyR-BPs. Top enriched  
49 terms are shown. **(B)** GO Cellular Component enrichment showing predominant localization  
50 patterns. **(C)** InterPro protein motif enrichment for rGAL-based glyR-BPs. **(D)** Tissue  
51 enrichment analysis (UP\_Tissue database) showing the most significantly enriched tissues. Top  
52 categories are shown here.
