# Supplementary material for: Mapping the GlycoRNA-Protein Interactome: Insights into Glycan-Modified RNA Binding Partners and Functional Networks
Source: Research Square preprint supplement (doi:10.21203/rs.3.rs-7628445/v1), 2025-09-22
Supplement: Supplementary file 1 [file f4a8cc9d9d41c6db23daaa7d.xlsx]

## Sheet: Description
Table S1. miRNA expression in all samples
Table S2. Differential gene expression analysis of miRNA between rPAL labeled RNA versus the total small RNA from KG1a cells
Table S3. Potential glyco-miRNAs identified by small RNA sequencing

## Sheet: Table S1
Table S1. miRNA expression in all samples
Gene ID	Type	KG1A_to_1A Expression	KG1A_to_1A Read Count	KG1A_to_2A Expression	KG1A_to_2A Read Count	KG1A_to_3A Expression	KG1A_to_3A Read Count	KG1A_to_4A Expression	KG1A_to_4A Read Count	KG_ce_rPAL1 Expression	KG_ce_rPAL1 Read Count	KG_ce_rPAL2 Expression	KG_ce_rPAL2 Read Count	KG_ce_rPAL3 Expression	KG_ce_rPAL3 Read Count	KG_ce_rPAL4 Expression	KG_ce_rPAL4 Read Count
hsa-let-7a-2-3p	miRNA	1.136	23	0.86	16	0.938	16	3.042	57	0	0	0	0	0	0	0	0
hsa-let-7a-3p	miRNA	50.587	1024	55.984	1042	48.683	830	52.455	983	2.646	51	10.644	227	10.472	200	0	0
hsa-let-7a-5p	miRNA	11260.8	227943	13900.9	258730	14968	255189	15174.4	284369	4834.38	93193	11304.2	241082	13651.4	260711	288.919	6554
hsa-let-7b-3p	miRNA	0	0	0.107	2	0	0	0	0	0	0	0	0	0	0	0	0
hsa-let-7b-5p	miRNA	1970.34	39884	1863.21	34679	1884.34	32126	2274.22	42619	1954.96	37686	3369.33	71857	4717.64	90096	150.014	3403
hsa-let-7c-3p	miRNA	14.376	291	10.799	201	12.317	210	9.445	177	1.764	34	12.988	277	9.949	190	0	0
hsa-let-7c-5p	miRNA	1613.71	32665	1628.15	30304	1811.31	30881	1748.34	32764	999.006	19258	1895.55	40426	2440.82	46614	62.157	1410
hsa-let-7d-3p	miRNA	24.454	495	23.748	442	32.143	548	35.859	672	63.028	1215	174.053	3712	369.574	7058	11.902	270
hsa-let-7d-5p	miRNA	3038.26	61501	3697.74	68824	3480.51	59339	4314.24	80849	829.22	15985	3187.72	67984	3323.54	63472	94.955	2154
hsa-let-7e-3p	miRNA	15.907	322	19.02	354	18.418	314	37.46	702	1.141	22	10.878	232	8.273	158	1.058	24
hsa-let-7e-5p	miRNA	94.259	1908	119.92	2232	126.753	2161	230.629	4322	26.975	520	148.452	3166	176.88	3378	4.056	92
hsa-let-7f-1-3p	miRNA	0.84	17	0.591	11	0.293	5	0.694	13	0.052	1	0.047	1	0.105	2	0	0
hsa-let-7f-2-3p	miRNA	0.099	2	0.376	7	0.352	6	0.32	6	0	0	0	0	0.209	4	0	0
hsa-let-7f-5p	miRNA	17679.8	357878	20618.8	383766	20996.4	357966	20018.4	375145	2398.85	46243	8757.52	186770	7705.65	147160	167.339	3796
hsa-let-7g-3p	miRNA	3.705	75	4.352	81	5.044	86	5.55	104	0	0	1.407	30	0.052	1	0	0
hsa-let-7g-5p	miRNA	12453	252077	14529.5	270430	15160.3	258467	15690.5	294041	718.259	13846	3664.12	78144	3238.4	61846	93.897	2130
hsa-let-7i-3p	miRNA	14.425	292	13.486	251	22.054	376	36.606	686	0	0	0	0	0	0	0	0
hsa-let-7i-5p	miRNA	6312.85	127786	6860.72	127695	6173.05	105244	8027.09	150428	426.256	8217	2012.21	42914	2222.47	42444	86.623	1965
hsa-miR-1-3p	miRNA	455.287	9216	505.091	9401	385.654	6575	507.736	9515	13.695	264	96.498	2058	43.984	840	1.499	34
hsa-miR-1-5p	miRNA	0.494	10	0.322	6	0.704	12	0.213	4	0	0	0	0	0	0	0	0
hsa-miR-100-3p	miRNA	1.828	37	1.666	31	1.584	27	2.188	41	0	0	0	0	0	0	0	0
hsa-miR-100-5p	miRNA	597.91	12103	737.516	13727	499.386	8514	1221.56	22892	28.427	548	109.252	2330	169.34	3234	14.195	322
hsa-miR-101-3p	miRNA	8.892	180	13.056	243	12.2	208	13.607	255	0	0	0.047	1	0.052	1	0	0
hsa-miR-101-5p	miRNA	0.099	2	0.161	3	0.059	1	0.16	3	0	0	0	0	0	0	0	0
hsa-miR-10395-3p	miRNA	4.594	93	4.782	89	4.81	82	3.202	60	1.349	26	0	0	1.257	24	0	0
hsa-miR-10396b-5p	miRNA	0	0	0	0	0	0	0.053	1	0	0	0	0	0	0	0	0
hsa-miR-10399-3p	miRNA	0.593	12	0.752	14	0.293	5	0.64	12	0	0	0	0	0	0	0	0
hsa-miR-10399-5p	miRNA	2.371	48	1.021	19	1.76	30	2.508	47	0	0	0	0	0	0	0	0
hsa-miR-103a-1-5p	miRNA	0.988	20	0.86	16	0.235	4	0.587	11	0	0	0	0	0	0	0	0
hsa-miR-103a-2-5p	miRNA	17.389	352	11.175	208	11.614	198	7.524	141	0	0	0	0	0.628	12	0	0
hsa-miR-103a-3p	miRNA	1449.6	29343	6.985	130	6.745	115	0.053	1	19.297	372	54.861	1170	60.531	1156	0	0
hsa-miR-103b	miRNA	42.189	854	1458.59	27148	1112.74	18971	1206.29	22606	0	0	0.985	21	4.87	93	9.522	216
hsa-miR-10523-5p	miRNA	0.049	1	0	0	0.059	1	0.16	3	0	0	0	0	1.152	22	0	0
hsa-miR-10526-3p	miRNA	0	0	0	0	0	0	0.107	2	0	0	0	0	0	0	0	0
hsa-miR-10527-5p	miRNA	1.581	32	1.128	21	1.173	20	1.814	34	0	0	6.236	133	0.681	13	0	0
hsa-miR-106a-5p	miRNA	0.148	3	0.215	4	0	0	0.213	4	0	0	0	0	0	0	0	0
hsa-miR-106b-3p	miRNA	0.543	11	1.128	21	0.352	6	1.014	19	0	0	1.266	27	0	0	0	0
hsa-miR-106b-5p	miRNA	31.518	638	31.699	590	31.556	538	39.808	746	0	0	1.454	31	0	0	0	0
hsa-miR-107	miRNA	5.484	111	6.34	118	4.106	70	17.663	331	0	0	0	0	0	0	0	0
hsa-miR-10a-5p	miRNA	0.049	1	0	0	0	0	0.053	1	0.311	6	1.313	28	0	0	0	0
hsa-miR-10b-5p	miRNA	0	0	0	0	0	0	0.213	4	0	0	0	0	0	0	0	0
hsa-miR-1179	miRNA	0	0	0	0	0.117	2	0.107	2	0	0	0	0	0	0	0	0
hsa-miR-1180-3p	miRNA	38.188	773	24.5	456	26.219	447	25.987	487	10.531	203	35.355	754	51.734	988	4.012	91
hsa-miR-12114	miRNA	0.198	4	0	0	0	0	0	0	0	0	0	0	0	0	0	0
hsa-miR-12125	miRNA	0	0	0.107	2	0	0	0.107	2	0	0	0	0	0	0	0	0
hsa-miR-12135	miRNA	0.198	4	0.107	2	0.059	1	0	0	0	0	0	0	0	0	0	0
hsa-miR-12136	miRNA	12.153	246	24.446	455	26.805	457	21.451	402	93.894	1810	37.933	809	30.841	589	34.826	790
hsa-miR-122-5p	miRNA	0.395	8	0.967	18	0.411	7	0.267	5	9.441	182	5.861	125	2.252	43	5.422	123
hsa-miR-1225-3p	miRNA	0	0	0	0	0	0	0	0	0	0	0	0	0.052	1	0	0
hsa-miR-1225-5p	miRNA	0	0	0	0	0.059	1	0	0	0	0	0	0	0	0	2.204	50
hsa-miR-1226-3p	miRNA	9.979	202	4.997	93	5.983	102	7.257	136	8.041	155	3.751	80	15.866	303	0.661	15
hsa-miR-1226-5p	miRNA	0	0	0.054	1	0	0	0	0	0	0	0	0	0	0	0	0
hsa-miR-1227-3p	miRNA	3.755	76	2.955	55	2.288	39	1.921	36	0	0	2.438	52	7.435	142	0	0
hsa-miR-1228-3p	miRNA	0	0	0	0	0	0	0	0	0	0	0	0	0.052	1	0	0
hsa-miR-1229-3p	miRNA	0.445	9	0.43	8	0.645	11	0.854	16	0	0	0.047	1	0.419	8	0	0
hsa-miR-1229-5p	miRNA	0.049	1	0	0	0	0	0	0	0	0	0	0	0	0	0	0
hsa-miR-1233-3p	miRNA	1.087	22	0.86	16	0.587	10	0.961	18	0	0	0.281	6	0.419	8	0.044	1
hsa-miR-1234-3p	miRNA	0	0	0	0	0	0	0.107	2	0	0	0	0	0	0	0	0
hsa-miR-1236-3p	miRNA	0	0	0.215	4	0.117	2	0.213	4	0	0	0	0	0	0	0	0
hsa-miR-1237-3p	miRNA	0.148	3	0	0	0.176	3	0.053	1	0	0	1.36	29	3.77	72	0.044	1
hsa-miR-124-3p	miRNA	0.148	3	0.107	2	0	0	0.107	2	0	0	0	0	0	0	0	0
hsa-miR-124-5p	miRNA	0	0	0	0	0.059	1	0	0	0	0	0	0	0	0	0	0
hsa-miR-1243	miRNA	0.692	14	1.289	24	1.114	19	0.854	16	0	0	0	0	0	0	0	0
hsa-miR-1244	miRNA	0	0	0	0	0	0	0	0	0	0	0	0	0.262	5	0	0
hsa-miR-1245b-5p	miRNA	0	0	0.107	2	0	0	0	0	0	0	0	0	0	0	0	0
hsa-miR-1246	miRNA	38.879	787	101.706	1893	137.369	2342	70.171	1315	16.548	319	56.173	1198	122.842	2346	7.803	177
hsa-miR-1248	miRNA	0	0	0	0	0	0	0.053	1	0	0	0	0	1.623	31	2.865	65
hsa-miR-1249-3p	miRNA	7.509	152	6.447	120	6.276	107	2.935	55	1.401	27	8.346	178	6.598	126	0.044	1
hsa-miR-1249-5p	miRNA	0	0	0.054	1	0	0	0.053	1	0	0	0.985	21	0	0	0	0
hsa-miR-1250-5p	miRNA	0.79	16	0.698	13	0.528	9	0.267	5	0	0	0	0	0	0	0	0
hsa-miR-1251-5p	miRNA	0.099	2	0	0	0	0	0	0	0	0	0	0	0	0	0	0
hsa-miR-1255a	miRNA	1.037	21	1.451	27	1.056	18	1.601	30	0	0	0	0	0.524	10	0	0
hsa-miR-1255b-2-3p	miRNA	0.099	2	0	0	0	0	0	0	0	0	0	0	0	0	0	0
hsa-miR-1255b-5p	miRNA	0	0	0.054	1	0.059	1	0.053	1	0	0	0	0	0	0	0	0
hsa-miR-1257	miRNA	0	0	0.107	2	0.117	2	0	0	0	0	0	0	0	0	0	0
hsa-miR-125a-3p	miRNA	1.581	32	1.666	31	1.818	31	4.963	93	2.542	49	2.813	60	1.728	33	0	0
hsa-miR-125a-5p	miRNA	22.626	458	20.524	382	20.412	348	31.483	590	4.772	92	28.743	613	42.466	811	0.882	20
hsa-miR-125b-1-3p	miRNA	0.296	6	0.43	8	0.587	10	1.761	33	2.334	45	1.688	36	0	0	0	0
hsa-miR-125b-2-3p	miRNA	5.237	106	5.05	94	4.34	74	2.775	52	0	0	0	0	0.733	14	0	0
hsa-miR-125b-5p	miRNA	129.729	2626	106.058	1974	118.072	2013	116.595	2185	18.675	360	30.337	647	32.308	617	3.527	80
hsa-miR-126-3p	miRNA	16957.6	343258	16306.6	303506	17216.8	293528	16578.6	310684	365.043	7037	1497.13	31929	1349.85	25779	61.848	1403
hsa-miR-126-5p	miRNA	213.86	4329	243.546	4533	288.757	4923	413.98	7758	1.971	38	7.455	159	9.006	172	0.044	1
hsa-miR-1260a	miRNA	0.099	2	0	0	0.059	1	0.16	3	0.363	7	0	0	0.733	14	0.044	1
hsa-miR-1260b	miRNA	0.247	5	0	0	0.176	3	0.16	3	0.052	1	0.094	2	0.419	8	0	0
hsa-miR-1261	miRNA	0	0	0	0	0	0	0	0	0	0	0.047	1	0	0	0	0
hsa-miR-1266-5p	miRNA	0.198	4	0.161	3	0	0	0	0	0	0	0	0	0	0	0	0
hsa-miR-1268a	miRNA	2.47	50	8.059	150	8.681	148	5.176	97	8.248	159	15.849	338	8.483	162	2.513	57
hsa-miR-1268b	miRNA	0.247	5	0.161	3	0.176	3	0.16	3	0	0	0	0	1.885	36	0	0
hsa-miR-127-3p	miRNA	0.198	4	0.054	1	0	0	0	0	4.15	80	0	0	0	0	0	0
hsa-miR-1270	miRNA	13.487	273	15.635	291	11.672	199	8.324	156	6.017	116	9.425	201	8.692	166	0	0
hsa-miR-1271-5p	miRNA	0.543	11	0.537	10	0.352	6	0.48	9	0	0	0.047	1	0.628	12	0.044	1
hsa-miR-1272	miRNA	0	0	0	0	0.059	1	0	0	0	0	0	0	0	0	0	0
hsa-miR-1273c	miRNA	0.741	15	1.075	20	0.235	4	0.64	12	0	0	0	0	0	0	0	0
hsa-miR-1273h-3p	miRNA	0	0	0	0	0	0	0.213	4	0	0	0	0	0	0	0	0
hsa-miR-1273h-5p	miRNA	0	0	0	0	0.117	2	0	0	0	0	0	0	0	0	0	0
hsa-miR-1275	miRNA	5.632	114	10.907	203	12.611	215	11.206	210	51.719	997	57.346	1223	64.929	1240	3.306	75
hsa-miR-1276	miRNA	0.049	1	0.269	5	0.117	2	0.107	2	0	0	0	0	0	0	0	0
hsa-miR-1277-3p	miRNA	10.572	214	9.187	171	6.276	107	7.15	134	0	0	0	0	0	0	0	0
hsa-miR-1278	miRNA	0.346	7	0.161	3	0.117	2	0.053	1	0	0	0	0	0	0	0	0
hsa-miR-128-1-5p	miRNA	1.68	34	0.967	18	1.173	20	1.067	20	0	0	0.234	5	0.524	10	0	0
hsa-miR-128-2-5p	miRNA	1.383	28	1.075	20	0.997	17	0.374	7	0	0	6.518	139	0.89	17	0	0
hsa-miR-128-3p	miRNA	1092.72	22119	801.022	14909	593.233	10114	717.714	13450	37.194	717	78.821	1681	198.663	3794	7.45	169
hsa-miR-1284	miRNA	24.651	499	20.04	373	17.303	295	12.006	225	3.061	59	8.768	187	9.478	181	0.044	1
hsa-miR-1285-3p	miRNA	0.296	6	0.215	4	0.352	6	0.694	13	0	0	0	0	0	0	0	0
hsa-miR-1285-5p	miRNA	0.346	7	0.269	5	0.235	4	0.374	7	0	0	1.735	37	0	0	1.631	37
hsa-miR-1287-3p	miRNA	4.891	99	4.352	81	3.285	56	2.028	38	0	0	0	0	0	0	0	0
hsa-miR-1287-5p	miRNA	18.822	381	16.924	315	14.488	247	8.698	163	0	0	0	0	0	0	0	0
hsa-miR-1288-3p	miRNA	0.049	1	0.269	5	0.117	2	0	0	0	0	0	0	0	0	0	0
hsa-miR-129-5p	miRNA	0	0	0.054	1	0	0	0.107	2	0	0	0	0	0	0	0	0
hsa-miR-1291	miRNA	0	0	0	0	0	0	0	0	0	0	1.125	24	0	0	0	0
hsa-miR-1292-3p	miRNA	0.148	3	0.107	2	0.293	5	0	0	0	0	0	0	0	0	0	0
hsa-miR-1292-5p	miRNA	4.446	90	2.149	40	3.402	58	2.134	40	3.527	68	8.346	178	1.78	34	0	0
hsa-miR-1293	miRNA	0	0	0	0	0	0	0.053	1	0	0	0	0	0	0	0	0
hsa-miR-1294	miRNA	0.198	4	0.752	14	0.352	6	0.267	5	0	0	0	0	0	0	0	0
hsa-miR-1296-5p	miRNA	16.648	337	8.274	154	11.027	188	8.698	163	2.801	54	2.391	51	8.378	160	0.529	12
hsa-miR-1297	miRNA	0	0	0	0	0	0	0	0	0.052	1	0	0	0	0	0	0
hsa-miR-1298-5p	miRNA	0.198	4	0.215	4	0.117	2	0	0	0	0	0	0	0	0	0	0
hsa-miR-1301-3p	miRNA	5.829	118	3.17	59	3.695	63	4.322	81	0	0	0	0	1.623	31	0.044	1
hsa-miR-1303	miRNA	0.049	1	0	0	0	0	0.053	1	0	0	0	0	0	0	0.044	1
hsa-miR-1304-3p	miRNA	1.927	39	1.182	22	0.938	16	1.654	31	2.075	40	1.172	25	1.466	28	0	0
hsa-miR-1304-5p	miRNA	0.395	8	0.484	9	0.587	10	0.32	6	0	0	0	0	1.414	27	0	0
hsa-miR-1306-3p	miRNA	0.642	13	0.376	7	0.704	12	0.427	8	0	0	1.5	32	0	0	0	0
hsa-miR-1306-5p	miRNA	1.877	38	1.343	25	2.346	40	1.441	27	6.432	124	8.393	179	6.022	115	0	0
hsa-miR-1307-3p	miRNA	224.778	4550	169.725	3159	197.783	3372	185.539	3477	10.012	193	20.913	446	24.663	471	7.626	173
hsa-miR-1307-5p	miRNA	35.174	712	28.852	537	28.506	486	23.426	439	0	0	0	0	0	0	0	0
hsa-miR-130a-3p	miRNA	166.286	3366	196.911	3665	188.692	3217	316.648	5934	0	0	5.767	123	5.498	105	1.19	27
hsa-miR-130a-5p	miRNA	11.807	239	9.886	184	14.429	246	12.273	230	0	0	0	0	2.252	43	3.483	79
hsa-miR-130b-3p	miRNA	8.892	180	15.044	280	11.907	203	40.502	759	0	0	0	0	0	0	0	0
hsa-miR-130b-5p	miRNA	138.374	2801	99.826	1858	100.71	1717	108.965	2042	70.602	1361	128.055	2731	258.513	4937	5.114	116
hsa-miR-132-3p	miRNA	0	0	0.107	2	0.117	2	0	0	0	0	0.141	3	0.105	2	0	0
hsa-miR-132-5p	miRNA	127.111	2573	121.531	2262	105.637	1801	27.855	522	0	0	9.894	211	5.655	108	0.044	1
hsa-miR-133a-3p	miRNA	22.527	456	18.805	350	15.719	268	27.481	515	0	0	0.047	1	3.613	69	0	0
hsa-miR-133a-5p	miRNA	0	0	0	0	0.176	3	0.107	2	0	0	0	0	0	0	0	0
hsa-miR-133b	miRNA	0.543	11	0.752	14	0.938	16	0.587	11	0	0	0	0	0	0	0	0
hsa-miR-1343-3p	miRNA	1.136	23	0.376	7	1.29	22	0.747	14	0	0	0	0	0.052	1	0	0
hsa-miR-1343-5p	miRNA	0	0	0	0	0	0	0.053	1	0	0	0	0	0	0	0	0
hsa-miR-135a-2-3p	miRNA	0	0	0.054	1	0	0	0	0	0	0	0	0	0	0	0	0
hsa-miR-135a-5p	miRNA	0.543	11	0.322	6	0.528	9	0.213	4	0	0	0	0	0	0	0	0
hsa-miR-135b-5p	miRNA	0.198	4	0.967	18	0.528	9	0.534	10	0	0	0	0	0.209	4	0	0
hsa-miR-136-3p	miRNA	0	0	0	0	0.059	1	0	0	0	0	0	0	0	0	0	0
hsa-miR-137-3p	miRNA	0.049	1	0	0	0	0	0	0	0	0	0	0	0	0	0	0
hsa-miR-138-2-3p	miRNA	0.099	2	0	0	0	0	0.16	3	0	0	0	0	0	0	0	0
hsa-miR-138-5p	miRNA	3.211	65	3.546	66	1.642	28	2.295	43	0	0	0	0	1.152	22	0	0
hsa-miR-139-3p	miRNA	0.939	19	0.43	8	1.232	21	0.587	11	0	0	0.844	18	0	0	0	0
hsa-miR-139-5p	miRNA	33.149	671	43.842	816	36.542	623	56.083	1051	1.867	36	51.813	1105	60.06	1147	0.044	1
hsa-miR-140-3p	miRNA	10.819	219	12.895	240	13.432	229	14.354	269	0	0	2.954	63	0.995	19	0.044	1
hsa-miR-140-5p	miRNA	253.579	5133	202.391	3767	241.598	4119	295.25	5533	6.069	117	6.143	131	16.965	324	0.882	20
hsa-miR-141-3p	miRNA	0.296	6	0.43	8	0.645	11	0.8	15	0	0	0	0	0.052	1	0	0
hsa-miR-141-5p	miRNA	0.247	5	0.161	3	0	0	0.213	4	0	0	0	0	0	0	0	0
hsa-miR-142-3p	miRNA	667.813	13518	779.531	14509	809.082	13794	1414.4	26506	3.112	60	33.807	721	23.197	443	1.631	37
hsa-miR-142-5p	miRNA	640.148	12958	958.336	17837	1667.85	28435	1868.99	35025	9.597	185	94.482	2015	24.401	466	4.541	103
hsa-miR-143-3p	miRNA	117.774	2384	89.779	1671	85.284	1454	51.868	972	2.49	48	16.224	346	3.194	61	1.499	34
hsa-miR-144-3p	miRNA	0.445	9	0.215	4	0.117	2	0.267	5	0	0	0	0	0.471	9	0	0
hsa-miR-145-3p	miRNA	0.247	5	0.054	1	0.235	4	0.053	1	0	0	0	0	0	0	0	0
hsa-miR-145-5p	miRNA	2.223	45	1.075	20	1.349	23	0.907	17	0	0	0.094	2	0.733	14	0.088	2
hsa-miR-1468-5p	miRNA	1.729	35	1.88	35	1.818	31	1.227	23	0	0	0	0	3.299	63	0	0
hsa-miR-146a-5p	miRNA	2958.03	59877	3866.49	71965	2572.24	43854	3010.24	56412	142.76	2752	1012.29	21589	1038.35	19830	51.974	1179
hsa-miR-146b-3p	miRNA	2.519	51	1.612	30	1.525	26	1.868	35	0	0	0	0	0.681	13	0	0
hsa-miR-146b-5p	miRNA	709.064	14353	681.908	12692	632.356	10781	769.475	14420	44.82	864	235.525	5023	228.09	4356	11.065	251
hsa-miR-147b-3p	miRNA	0	0	0	0	0	0	0.16	3	0	0	0	0	0	0	0	0
hsa-miR-147b-5p	miRNA	0.049	1	0.054	1	0	0	0.16	3	0	0	0	0	0	0	0	0
hsa-miR-148a-3p	miRNA	0.593	12	3.224	60	4.81	82	3.522	66	0.052	1	0	0	0	0	0.044	1
hsa-miR-148a-5p	miRNA	0	0	0.107	2	0.176	3	0.053	1	0	0	0	0	0	0	0	0
hsa-miR-148b-3p	miRNA	10.72	217	8.543	159	5.631	96	9.979	187	0	0	0	0	0	0	0	0
hsa-miR-148b-5p	miRNA	0	0	0	0	0.059	1	0	0	0	0	0	0	0	0	0	0
hsa-miR-149-5p	miRNA	0	0	0	0	0	0	0	0	1.245	24	0.047	1	0	0	0	0
hsa-miR-150-3p	miRNA	1.136	23	0.484	9	0.469	8	0.587	11	0	0	2.063	44	0	0	0	0
hsa-miR-150-5p	miRNA	168.756	3416	152.156	2832	154.614	2636	293.916	5508	337.446	6505	387.118	8256	866.231	16543	36.721	833
hsa-miR-151a-3p	miRNA	50.686	1026	35.191	655	43.522	742	114.461	2145	1.401	27	3.376	72	1.571	30	0.044	1
hsa-miR-151a-5p	miRNA	1777.72	35985	2199.65	40941	1907.86	32527	2276.46	42661	108.211	2086	546.917	11664	485.923	9280	23.981	544
hsa-miR-151b	miRNA	4.496	91	7.146	133	8.505	145	10.299	193	0.882	17	2.485	53	2.513	48	0	0
hsa-miR-152-3p	miRNA	0.889	18	0.537	10	0.704	12	0.534	10	0	0	0	0	0	0	0	0
hsa-miR-152-5p	miRNA	0.247	5	0	0	0	0	0	0	0	0	0	0	0	0	0	0
hsa-miR-153-3p	miRNA	6.57	133	7.307	136	10.441	178	12.7	238	0	0	0	0	0	0	0	0
hsa-miR-1537-3p	miRNA	2.421	49	2.74	51	2.229	38	3.095	58	0	0	0	0	0	0	0	0
hsa-miR-1537-5p	miRNA	0	0	0.054	1	0.059	1	0	0	0	0	0	0	0	0	0	0
hsa-miR-154-5p	miRNA	0	0	0	0	0	0	0	0	0.052	1	0	0	0	0	0	0
hsa-miR-155-3p	miRNA	2.47	50	2.525	47	4.047	69	3.255	61	0	0	0	0	0	0	0	0
hsa-miR-155-5p	miRNA	4123.66	83472	3923.77	73031	3417.22	58260	6086.16	114055	796.642	15357	3612.17	77036	3501.37	66868	153.761	3488
hsa-miR-15a-3p	miRNA	12.993	263	11.659	217	12.083	206	12.273	230	0	0	0	0	0.052	1	0	0
hsa-miR-15a-5p	miRNA	1129.87	22871	1010.34	18805	864.98	14747	1041.94	19526	4.046	78	40.606	866	66.081	1262	0.926	21
hsa-miR-15b-3p	miRNA	54.194	1097	67.106	1249	46.982	801	35.806	671	2.853	55	19.928	425	5.446	104	0.132	3
hsa-miR-15b-5p	miRNA	2716.11	54980	3205.81	59668	2034.55	34687	2170.11	40668	55.35	1067	315.8	6735	251.496	4803	8.508	193
hsa-miR-16-1-3p	miRNA	0	0	0.054	1	0	0	0.053	1	0	0	0	0	0	0	0	0
hsa-miR-16-2-3p	miRNA	2.223	45	3.707	69	2.581	44	2.882	54	0	0	0	0	0	0	0	0
hsa-miR-16-5p	miRNA	12671.8	256504	13505.4	251369	10238.8	174560	13495.9	252914	332.155	6403	1613.32	34407	1140.77	21786	88.474	2007
hsa-miR-17-3p	miRNA	16.056	325	23.748	442	17.772	303	16.009	300	0	0	1.266	27	0	0	0	0
hsa-miR-17-5p	miRNA	846.351	17132	1012.92	18853	866.446	14772	1334.31	25005	28.998	559	118.489	2527	61.84	1181	10.977	249
hsa-miR-181a-2-3p	miRNA	399.315	8083	272.882	5079	282.715	4820	280.309	5253	81.703	1575	155.438	3315	231.18	4415	9.742	221
hsa-miR-181a-3p	miRNA	2064.5	41790	2062.86	38395	1671.07	28490	1198.93	22468	16.289	314	51.578	1100	61.212	1169	1.984	45
hsa-miR-181a-5p	miRNA	20615.6	417304	22196.9	413139	23339	397906	24470.4	458577	434.867	8383	2704.39	57676	5045.85	96364	239.326	5429
hsa-miR-181b-2-3p	miRNA	1.235	25	1.612	30	1.056	18	0.854	16	0	0	0	0	0	0	0	0
hsa-miR-181b-3p	miRNA	0.395	8	0.43	8	0.352	6	0.267	5	0	0	0	0	0	0	0	0
hsa-miR-181b-5p	miRNA	3479.07	70424	3321.32	61818	3002.59	51191	3074.38	57614	172.121	3318	740.101	15784	562.267	10738	57.484	1304
hsa-miR-181c-3p	miRNA	0	0	0.269	5	0.117	2	0.053	1	0	0	0	0	0	0	0	0
hsa-miR-181c-5p	miRNA	37.298	755	64.795	1206	69.858	1191	56.083	1051	0.052	1	10.831	231	8.273	158	0.926	21
hsa-miR-181d-5p	miRNA	31.222	632	26.112	486	23.11	394	34.365	644	0.156	3	2.907	62	0.314	6	0.044	1
hsa-miR-182-5p	miRNA	0.593	12	0.376	7	1.408	24	0.64	12	0	0	0.188	4	1.204	23	0.573	13
hsa-miR-183-3p	miRNA	0	0	0.107	2	0.059	1	0	0	0	0	0	0	0	0	0	0
hsa-miR-183-5p	miRNA	0.099	2	0.484	9	0.411	7	0.32	6	2.023	39	0	0	0.052	1	0.088	2
hsa-miR-184	miRNA	0	0	0	0	0	0	0.053	1	0	0	0	0	0	0	0	0
hsa-miR-1843	miRNA	6.126	124	6.608	123	4.868	83	3.949	74	0	0	3.235	69	1.152	22	0	0
hsa-miR-185-5p	miRNA	180.465	3653	255.957	4764	184.117	3139	191.195	3583	14.525	280	54.861	1170	27.071	517	9.257	210
hsa-miR-186-3p	miRNA	0	0	0	0	0.059	1	0	0	0	0	0	0	0	0	0	0
hsa-miR-186-5p	miRNA	17.291	350	12.895	240	17.068	291	33.138	621	0	0	1.313	28	1.833	35	0.044	1
hsa-miR-187-3p	miRNA	0.494	10	0.215	4	0.235	4	0	0	0	0	0	0	0	0	0	0
hsa-miR-188-3p	miRNA	0.346	7	0.591	11	0.469	8	0.32	6	0	0	0	0	0	0	0	0
hsa-miR-188-5p	miRNA	6.027	122	4.889	91	5.807	99	6.297	118	0	0	0	0	0	0	0	0
hsa-miR-18a-3p	miRNA	73.46	1487	58.187	1083	60.18	1026	73.052	1369	14.266	275	41.544	886	48.959	935	1.455	33
hsa-miR-18a-5p	miRNA	746.016	15101	640.753	11926	500.852	8539	517.662	9701	4.098	79	16.411	350	15.604	298	1.587	36
hsa-miR-18b-5p	miRNA	0.346	7	0.054	1	0.059	1	0.107	2	0	0	0	0	0	0	0	0
hsa-miR-1908-3p	miRNA	0.889	18	1.128	21	0.704	12	0.854	16	0	0	2.251	48	0.995	19	0	0
hsa-miR-1908-5p	miRNA	3.112	63	2.579	48	3.695	63	2.188	41	38.699	746	29.353	626	10.368	198	0.397	9
hsa-miR-190a-3p	miRNA	0	0	0.107	2	0	0	0.107	2	0	0	0	0	0	0	0	0
hsa-miR-190a-5p	miRNA	0.84	17	0.484	9	0.469	8	1.174	22	0	0	0	0	0	0	0	0
hsa-miR-190b-3p	miRNA	0.148	3	0.054	1	0.059	1	0	0	0	0	0	0	0	0	0	0
hsa-miR-190b-5p	miRNA	7.46	151	5.104	95	4.282	73	2.455	46	0	0	1.547	33	2.618	50	0	0
hsa-miR-191-3p	miRNA	30.382	615	19.825	369	21.116	360	16.169	303	14.006	270	32.447	692	33.041	631	4.276	97
hsa-miR-191-5p	miRNA	8550.21	173075	8693.85	161814	8313.59	141738	8363.11	156725	1395.69	26905	4200.86	89591	5052.92	96499	325.023	7373
hsa-miR-1910-5p	miRNA	0	0	0.322	6	0.059	1	0.053	1	0	0	0	0	0	0	0	0
hsa-miR-1913	miRNA	0.099	2	0	0	0.059	1	0	0	0	0	0	0	1.257	24	0	0
hsa-miR-1914-5p	miRNA	0	0	0.054	1	0.059	1	0	0	0	0	0	0	0	0	0	0
hsa-miR-1915-5p	miRNA	0.099	2	0	0	0	0	0.16	3	0	0	0	0	0	0	0	0
hsa-miR-192-3p	miRNA	0	0	0.054	1	0	0	0.107	2	0	0	0	0	0	0	0	0
hsa-miR-192-5p	miRNA	118.021	2389	136.683	2544	113.027	1927	143.65	2692	0.104	2	3.517	75	1.99	38	0.485	11
hsa-miR-193a-3p	miRNA	0	0	0.107	2	0.117	2	0.267	5	0	0	0	0	0	0	0.044	1
hsa-miR-193a-5p	miRNA	0.148	3	0.107	2	0.059	1	0.267	5	0	0	0	0	0	0	0	0
hsa-miR-193b-3p	miRNA	0.148	3	0	0	0	0	0	0	0	0	0	0	0	0	0	0
hsa-miR-194-3p	miRNA	0.099	2	0	0	0.117	2	0.107	2	0	0	0	0	0	0	0	0
hsa-miR-194-5p	miRNA	70.052	1418	63.398	1180	44.402	757	106.083	1988	0.052	1	5.58	119	1.937	37	0.176	4
hsa-miR-195-3p	miRNA	0.148	3	0	0	0.059	1	0	0	0	0	0	0	0	0	0	0
hsa-miR-195-5p	miRNA	0.099	2	0.86	16	0.059	1	0.907	17	0	0	0	0	0	0	0	0
hsa-miR-196a-5p	miRNA	4.002	81	4.298	80	3.402	58	4.536	85	0.207	4	5.345	114	2.88	55	0.044	1
hsa-miR-196b-3p	miRNA	3.508	71	4.244	79	3.167	54	3.362	63	0	0	0	0	0	0	0	0
hsa-miR-196b-5p	miRNA	15231.4	308316	16526.9	307607	12201.9	208029	12628	236649	1295.37	24971	3690.8	78713	4628.2	88388	364.742	8274
hsa-miR-197-3p	miRNA	56.367	1141	46.098	858	43.053	734	85.752	1607	48.503	935	72.632	1549	88.911	1698	12.652	287
hsa-miR-197-5p	miRNA	0.099	2	0.107	2	0.117	2	0.213	4	0	0	0	0	0	0	0	0
hsa-miR-1972	miRNA	0.099	2	0	0	0.059	1	0	0	0	0	0	0	0	0	0	0
hsa-miR-1973	miRNA	0.049	1	0	0	0	0	0	0	0	0	0	0	0	0	0	0
hsa-miR-1976	miRNA	0.049	1	0	0	0.117	2	0	0	0	0	0	0	0	0	0.044	1
hsa-miR-199a-3p	miRNA	1430.53	28957	1701.22	31664	1089.69	18578	1224.7	22951	0	0	218.317	4656	0	0	5.643	128
hsa-miR-199a-5p	miRNA	1936.65	39202	1763.87	32830	1613.94	27516	1139.54	21355	13.799	266	82.385	1757	147.714	2821	2.865	65
hsa-miR-199b-3p	miRNA	10.868	220	9.563	178	7.273	124	7.791	146	14.369	277	0	0	177.561	3391	0	0
hsa-miR-199b-5p	miRNA	903.855	18296	801.237	14913	511.644	8723	604.054	11320	0.986	19	8.018	171	5.969	114	0.176	4
hsa-miR-19a-3p	miRNA	20.946	424	25.521	475	19.649	335	37.086	695	0	0	0.047	1	0	0	0	0
hsa-miR-19b-1-5p	miRNA	14.771	299	18.052	336	13.432	229	17.182	322	1.867	36	0	0	1.152	22	0	0
hsa-miR-19b-3p	miRNA	2705.39	54763	3379.45	62900	2096.08	35736	2827.16	52981	0.052	1	0.891	19	6.336	121	1.102	25
hsa-miR-200a-3p	miRNA	0.395	8	0.591	11	0.469	8	0.213	4	0	0	0	0	0	0	0	0
hsa-miR-200a-5p	miRNA	0	0	0.054	1	0.117	2	0	0	0	0	0	0	0	0	0	0
hsa-miR-200b-3p	miRNA	0	0	0	0	0.059	1	0.053	1	0	0	0	0	0	0	0	0
hsa-miR-200c-3p	miRNA	5.286	107	3.062	57	3.754	64	2.508	47	0	0	9.097	194	13.405	256	1.807	41
hsa-miR-200c-5p	miRNA	0.099	2	0.161	3	0.117	2	0	0	0.882	17	0	0	0	0	0	0
hsa-miR-202-5p	miRNA	0.049	1	0.054	1	0	0	0.053	1	0	0	0	0	0	0	0	0
hsa-miR-203a-3p	miRNA	1.136	23	1.451	27	2.053	35	0.48	9	0	0	0	0	0	0	0	0
hsa-miR-204-3p	miRNA	0	0	0	0	0.059	1	0	0	0	0	0	0	0	0	0	0
hsa-miR-204-5p	miRNA	7.262	147	14.99	279	11.555	197	13.18	247	1.764	34	4.408	94	9.687	185	0.044	1
hsa-miR-205-5p	miRNA	0	0	0	0	0	0	0	0	1.66	32	0	0	0	0	0	0
hsa-miR-20a-3p	miRNA	0.84	17	1.558	29	1.232	21	1.494	28	0	0	0	0	0	0	0	0
hsa-miR-20a-5p	miRNA	1770.9	35847	2103.37	39149	1529.18	26071	2155.17	40388	6.329	122	44.076	940	36.13	690	6.392	145
hsa-miR-20b-5p	miRNA	0.049	1	0	0	0.117	2	0	0	0	0	0	0	0.052	1	0	0
hsa-miR-21-3p	miRNA	59.529	1205	49.429	920	41.586	709	43.65	818	0	0	0.422	9	0	0	0	0
hsa-miR-21-5p	miRNA	6102.7	123532	6724.47	125159	5613.6	95706	5365.14	100543	40.826	787	347.684	7415	215.262	4111	8.376	190
hsa-miR-210-3p	miRNA	5.829	118	12.841	239	8.505	145	22.892	429	0	0	0	0	0	0	0.044	1
hsa-miR-210-5p	miRNA	0.988	20	1.182	22	0.704	12	3.469	65	0	0	2.579	55	5.655	108	0.882	20
hsa-miR-211-5p	miRNA	0.049	1	0.107	2	0.059	1	0.053	1	0	0	0	0	0	0	0	0
hsa-miR-2110	miRNA	7.163	145	5.265	98	5.279	90	6.937	130	9.337	180	10.691	228	8.064	154	1.587	36
hsa-miR-2114-5p	miRNA	0.049	1	0.054	1	0.059	1	0.053	1	0	0	0	0	0	0	0	0
hsa-miR-2115-3p	miRNA	0.099	2	0.107	2	0	0	0.107	2	0	0	0	0	0	0	0	0
hsa-miR-212-3p	miRNA	2.865	58	1.773	33	1.466	25	0.907	17	0	0	0	0	0	0	0	0
hsa-miR-212-5p	miRNA	0.642	13	0.913	17	0.352	6	0.267	5	0	0	0	0	0	0	0	0
hsa-miR-214-3p	miRNA	169.102	3423	167.576	3119	142.883	2436	116.275	2179	166.933	3218	414.314	8836	408.06	7793	21.336	484
hsa-miR-214-5p	miRNA	89.269	1807	72.048	1341	71.793	1224	62.54	1172	4.202	81	3.048	65	15.709	300	0.529	12
hsa-miR-215-3p	miRNA	0	0	0	0	0.059	1	0	0	0	0	0	0	0	0	0.044	1
hsa-miR-218-1-3p	miRNA	0.049	1	0	0	0	0	0.107	2	0	0	0	0	0	0	0	0
hsa-miR-218-5p	miRNA	698.936	14148	498.322	9275	373.982	6376	425.826	7980	5.187	100	28.602	610	21.259	406	0.132	3
hsa-miR-219a-1-3p	miRNA	0.346	7	0.806	15	0.352	6	0.534	10	0	0	1.594	34	0	0	0	0
hsa-miR-219a-5p	miRNA	0.049	1	0	0	0.059	1	0	0	0	0	0	0	0	0	0	0
hsa-miR-219b-5p	miRNA	3.952	80	4.406	82	2.815	48	4.856	91	0	0	0	0	0	0	0	0
hsa-miR-22-3p	miRNA	626.612	12684	509.766	9488	536.279	9143	364.834	6837	0.674	13	15.661	334	26.705	510	3.879	88
hsa-miR-22-5p	miRNA	1.63	33	1.397	26	1.173	20	0.907	17	0	0	0	0	0	0	0	0
hsa-miR-221-3p	miRNA	1410.87	28559	1182.92	22017	1043.47	17790	1111.58	20831	16.496	318	91.528	1952	83.047	1586	5.863	133
hsa-miR-221-5p	miRNA	1.68	34	1.504	28	1.994	34	1.067	20	0	0	0	0	0	0	0	0
hsa-miR-222-3p	miRNA	5212.33	105509	3658.57	68095	3985.58	67950	3140.33	58850	2393.3	46136	3942.08	84072	4986.21	95225	511.582	11605
hsa-miR-222-5p	miRNA	0.099	2	0.054	1	0.059	1	0.16	3	0	0	0	0	0.314	6	0	0
hsa-miR-223-3p	miRNA	1996.97	40423	2270.9	42267	2074.26	35364	2292.79	42967	7.211	139	88.996	1898	87.864	1678	4.452	101
hsa-miR-223-5p	miRNA	149.638	3029	164.675	3065	159.071	2712	106.296	1992	2.853	55	13.129	280	13.091	250	0	0
hsa-miR-2276-3p	miRNA	0.198	4	0.43	8	0.176	3	0.427	8	0	0	0	0	0	0	0	0
hsa-miR-2276-5p	miRNA	0.395	8	0.054	1	0.117	2	0.107	2	0	0	0	0	0	0	0	0
hsa-miR-2277-3p	miRNA	1.284	26	0.591	11	0.938	16	0.374	7	0	0	0	0	1.204	23	0	0
hsa-miR-2277-5p	miRNA	0.939	19	0.86	16	1.29	22	0.374	7	0	0	0	0	0	0	0	0
hsa-miR-2278	miRNA	0.395	8	0.054	1	0.176	3	0.374	7	0	0	0	0	0	0	0	0
hsa-miR-23a-3p	miRNA	6838.84	138433	7422.28	138147	6297.22	107361	6511.14	122019	1606.36	30966	3065.11	65369	5216.71	99627	478.212	10848
hsa-miR-23a-5p	miRNA	0.247	5	0.698	13	0.352	6	0.587	11	0	0	1.735	37	0.628	12	0	0
hsa-miR-23b-3p	miRNA	184.071	3726	144.527	2690	89.8	1531	111.633	2092	38.232	737	48.015	1024	64.772	1237	7.318	166
hsa-miR-23b-5p	miRNA	0.692	14	0.645	12	0.235	4	0.907	17	0	0	0	0	0	0	0	0
hsa-miR-24-1-5p	miRNA	0.642	13	0.269	5	0.469	8	0.213	4	0	0	0	0	0	0	0	0
hsa-miR-24-2-5p	miRNA	0.445	9	1.021	19	0.88	15	0.854	16	0	0	0	0	0	0	0	0
hsa-miR-24-3p	miRNA	7353.16	148844	5178.35	96382	9542.93	162697	8005.42	150022	253.927	4895	1050.09	22395	1376.35	26285	100.729	2285
hsa-miR-2467-3p	miRNA	0.395	8	0	0	0	0	0	0	0	0	0	0	0	0	0	0
hsa-miR-2467-5p	miRNA	0.198	4	0.215	4	0.293	5	0.267	5	0	0	0	0	0	0	0	0
hsa-miR-25-3p	miRNA	1383.55	28006	1292.36	24054	1066.34	18180	891.407	16705	7.781	150	125.523	2677	118.967	2272	15.605	354
hsa-miR-25-5p	miRNA	16.401	332	13.915	259	17.596	300	1.387	26	12.294	237	40.606	866	51.839	990	0.882	20
hsa-miR-26a-2-3p	miRNA	4.841	98	4.137	77	3.813	65	4.536	85	0	0	1.735	37	0.314	6	0	0
hsa-miR-26a-5p	miRNA	3232.31	65429	2883.01	53660	3025.11	51575	3503.25	65651	257.766	4969	1070.44	22829	1156.79	22092	32.004	726
hsa-miR-26b-3p	miRNA	2.519	51	2.579	48	4.164	71	8.004	150	0	0	0.141	3	1.885	36	0	0
hsa-miR-26b-5p	miRNA	414.777	8396	621.841	11574	595.99	10161	649.998	12181	32.162	620	225.163	4802	53.253	1017	8.817	200
hsa-miR-27a-3p	miRNA	15626.2	316308	15918.6	296284	13543.1	230895	17368.4	325485	42.901	827	265.487	5662	266.315	5086	13.137	298
hsa-miR-27a-5p	miRNA	150.774	3052	130.128	2422	148.044	2524	132.604	2485	92.856	1790	99.358	2119	269.038	5138	18.867	428
hsa-miR-27b-3p	miRNA	1123.84	22749	1104.64	20560	767.496	13085	838.472	15713	0.207	4	36.245	773	30.789	588	0.22	5
hsa-miR-27b-5p	miRNA	26.084	528	12.626	235	12.904	220	3.308	62	3.994	77	11.113	237	12.2	233	0	0
hsa-miR-28-3p	miRNA	79.438	1608	72.962	1358	72.087	1229	85.592	1604	1.919	37	10.034	214	20.16	385	0.044	1
hsa-miR-28-5p	miRNA	105.374	2133	84.245	1568	78.069	1331	83.564	1566	12.709	245	62.363	1330	41.89	800	4.1	93
hsa-miR-296-5p	miRNA	0.099	2	0.484	9	0.645	11	0.267	5	0	0	0.094	2	0	0	0	0
hsa-miR-29a-3p	miRNA	75.486	1528	94.238	1754	104.229	1777	145.411	2725	0	0	1.594	34	1.361	26	0	0
hsa-miR-29a-5p	miRNA	1.63	33	1.504	28	0.938	16	1.121	21	0	0	0	0	0	0	0	0
hsa-miR-29b-1-5p	miRNA	6.768	137	6.877	128	4.927	84	3.148	59	3.631	70	8.346	178	5.655	108	0	0
hsa-miR-29b-2-5p	miRNA	3.31	67	3.653	68	2.933	50	1.708	32	0	0	0.563	12	0	0	0	0
hsa-miR-29b-3p	miRNA	150.428	3045	139.1	2589	124.7	2126	126.841	2377	0	0	0.094	2	0.105	2	0	0
hsa-miR-29c-3p	miRNA	70.052	1418	97.515	1815	107.338	1830	94.877	1778	0	0	0.094	2	1.309	25	0.044	1
hsa-miR-29c-5p	miRNA	70.793	1433	58.187	1083	47.804	815	44.237	829	3.631	70	2.813	60	7.488	143	1.587	36
hsa-miR-301a-3p	miRNA	494.265	10005	478.98	8915	396.975	6768	442.528	8293	0.052	1	4.032	86	3.037	58	1.058	24
hsa-miR-301a-5p	miRNA	5.829	118	7.146	133	6.569	112	6.777	127	0	0	0	0	0	0	0	0
hsa-miR-301b-3p	miRNA	80.13	1622	83.6	1556	118.072	2013	191.995	3598	0	0	0	0	0.105	2	0	0
hsa-miR-301b-5p	miRNA	0.247	5	0.269	5	0.645	11	0.32	6	0	0	0	0	0	0	0	0
hsa-miR-302a-3p	miRNA	0.099	2	0.107	2	0.059	1	0	0	0	0	0	0	0	0	0	0
hsa-miR-302b-3p	miRNA	0.099	2	0.161	3	0.059	1	0	0	0	0	0	0	0	0	0	0
hsa-miR-302d-3p	miRNA	0.198	4	0.054	1	0	0	0	0	0	0	0	0	0	0	0	0
hsa-miR-3059-5p	miRNA	0	0	0	0	0.117	2	0	0	0	0	0	0	0	0	0	0
hsa-miR-3064-3p	miRNA	0.198	4	0	0	0	0	0	0	0	0	0	0	0	0	0	0
hsa-miR-3064-5p	miRNA	0.642	13	0.43	8	0.411	7	0.534	10	0	0	0	0	0.367	7	0	0
hsa-miR-3065-3p	miRNA	0	0	0.161	3	0.117	2	0.16	3	0	0	0	0	0	0	0	0
hsa-miR-3065-5p	miRNA	0.099	2	0.591	11	0.176	3	0.32	6	0	0	0	0	0	0	0	0
hsa-miR-3074-3p	miRNA	0.84	17	0.698	13	0.997	17	1.067	20	0	0	0.047	1	0	0	0	0
hsa-miR-3074-5p	miRNA	1638.85	33174	1447.04	26933	3021.3	51510	1774.28	33250	44.924	866	202.843	4326	288.098	5502	18.162	412
hsa-miR-30a-3p	miRNA	0	0	0	0	0	0	0.053	1	0.052	1	0	0	0	0	0	0
hsa-miR-30a-5p	miRNA	0.148	3	0.269	5	0.293	5	0.267	5	0	0	0	0	0	0	0	0
hsa-miR-30b-3p	miRNA	20.255	410	24.553	457	18.3	312	22.946	430	15.926	307	31.228	666	12.2	233	1.675	38
hsa-miR-30b-5p	miRNA	669.295	13548	1002.88	18666	859.349	14651	1202.61	22537	29.672	572	97.764	2085	94.514	1805	4.452	101
hsa-miR-30c-1-3p	miRNA	6.719	136	8.919	166	7.86	134	8.324	156	7.055	136	3.329	71	1.466	28	0	0
hsa-miR-30c-5p	miRNA	82.155	1663	105.789	1969	92.85	1583	156.51	2933	3.787	73	24.289	518	11.991	229	2.733	62
hsa-miR-30d-3p	miRNA	56.466	1143	58.187	1083	41	699	64.728	1213	0	0	1.829	39	0.052	1	0	0
hsa-miR-30d-5p	miRNA	637.876	12912	709.578	13207	816.883	13927	759.283	14229	20.335	392	85.385	1821	79.172	1512	9.037	205
hsa-miR-30e-3p	miRNA	93.073	1884	141.572	2635	84.521	1441	91.889	1722	7.885	152	20.866	445	14.504	277	1.278	29
hsa-miR-30e-5p	miRNA	5.879	119	8.543	159	7.977	136	16.169	303	0	0	0	0	0	0	0	0
hsa-miR-31-3p	miRNA	0.692	14	0.215	4	0.059	1	0.16	3	0.052	1	0	0	0	0	0	0
hsa-miR-31-5p	miRNA	0.395	8	0.269	5	0.293	5	0.32	6	0	0	0	0	0	0	0	0
hsa-miR-3115	miRNA	2.322	47	3.331	62	2.229	38	1.654	31	0	0	1.829	39	0	0	0	0
hsa-miR-3120-3p	miRNA	37.941	768	35.675	664	34.9	595	32.817	615	0	0	4.032	86	3.927	75	0	0
hsa-miR-3120-5p	miRNA	0.049	1	0	0	0.235	4	0	0	0	0	0	0	0	0	0	0
hsa-miR-3121-3p	miRNA	0.049	1	0.107	2	0.117	2	0.053	1	0	0	0	0	0	0	0	0
hsa-miR-3121-5p	miRNA	0.445	9	0.161	3	0.645	11	0.16	3	0	0	0	0	0.785	15	0	0
hsa-miR-3124-5p	miRNA	1.383	28	1.182	22	1.173	20	0.48	9	0.467	9	1.313	28	0	0	0.088	2
hsa-miR-3127-3p	miRNA	0	0	0.054	1	0.059	1	0	0	0	0	0	0	0.052	1	0	0
hsa-miR-3127-5p	miRNA	0	0	0.107	2	0.117	2	0	0	0	0	0.938	20	0	0	0	0
hsa-miR-3129-3p	miRNA	0.148	3	0	0	0.059	1	0	0	0	0	0	0	0	0	0	0
hsa-miR-3130-5p	miRNA	1.136	23	0.698	13	1.114	19	0.64	12	0	0	0	0	0.576	11	0	0
hsa-miR-3133	miRNA	0	0	0.054	1	0	0	0	0	0	0	0	0	0	0	0	0
hsa-miR-3134	miRNA	0.593	12	0.322	6	0.997	17	0.16	3	0	0	0	0	0	0	0	0
hsa-miR-3135a	miRNA	0.049	1	0	0	0.059	1	0.053	1	0	0	0	0	0	0	0	0
hsa-miR-3136-3p	miRNA	0.049	1	0.161	3	0.176	3	0.16	3	0	0	0	0	0	0	0	0
hsa-miR-3136-5p	miRNA	0.148	3	0.161	3	0.117	2	0.32	6	0	0	0	0	0	0	0	0
hsa-miR-3137	miRNA	0	0	0	0	0.059	1	0	0	0	0	0	0	0	0	0	0
hsa-miR-3138	miRNA	0.049	1	0	0	0	0	0	0	0	0	0	0	0	0	0	0
hsa-miR-3139	miRNA	0.939	19	0.215	4	0.528	9	0.64	12	0	0	0	0	0	0	0	0
hsa-miR-3140-3p	miRNA	0	0	0.054	1	0.059	1	0	0	0	0	0	0	0	0	0	0
hsa-miR-3140-5p	miRNA	0	0	0	0	0.059	1	0	0	0	0	0	0	0	0	0	0
hsa-miR-3146	miRNA	0.198	4	0	0	0.117	2	0.32	6	0	0	0	0	0	0	0	0
hsa-miR-3149	miRNA	0.049	1	0.054	1	0.117	2	0.32	6	0	0	0	0	0	0	0	0
hsa-miR-3150a-3p	miRNA	0.346	7	0.161	3	0.469	8	0.32	6	0	0	0	0	0	0	0	0
hsa-miR-3150a-5p	miRNA	0.346	7	0.376	7	0.821	14	0.64	12	0	0	1.172	25	0.943	18	0	0
hsa-miR-3150b-3p	miRNA	0.247	5	0.054	1	0.059	1	0	0	2.646	51	0	0	1.99	38	0	0
hsa-miR-3150b-5p	miRNA	0	0	0	0	0.059	1	0.053	1	0	0	0	0	0	0	0	0
hsa-miR-3151-5p	miRNA	0.395	8	0.215	4	0.469	8	1.067	20	0	0	3.001	64	0.943	18	0.397	9
hsa-miR-3152-5p	miRNA	0	0	0	0	0	0	0	0	0.052	1	0	0	0	0	0	0
hsa-miR-3155b	miRNA	0	0	0	0	0	0	0.053	1	0	0	0	0	0	0	0	0
hsa-miR-3157-3p	miRNA	0.939	19	1.128	21	0.469	8	0.587	11	0	0	0	0	0	0	0	0
hsa-miR-3157-5p	miRNA	6.57	133	3.385	63	3.989	68	3.469	65	0	0	0.422	9	2.147	41	0	0
hsa-miR-3158-3p	miRNA	0.099	2	0	0	0.059	1	0.107	2	0	0	0	0	0	0	0	0
hsa-miR-3158-5p	miRNA	0	0	0.054	1	0.117	2	0.053	1	0	0	0	0	0	0	0	0
hsa-miR-3159	miRNA	0.099	2	0.054	1	0	0	0	0	0	0	0	0	0	0	0	0
hsa-miR-3162-5p	miRNA	0	0	0.054	1	0	0	0	0	0	0	0	0	0	0	0	0
hsa-miR-3163	miRNA	0	0	0	0	0	0	0.107	2	0	0	0	0	0	0	0	0
hsa-miR-3164	miRNA	0.049	1	0	0	0.059	1	0.107	2	0	0	0	0	0	0	0	0
hsa-miR-3165	miRNA	0.148	3	0	0	0.117	2	0.213	4	0	0	0	0	0	0	0	0
hsa-miR-3173-5p	miRNA	2.569	52	2.633	49	2.17	37	3.308	62	0	0	5.252	112	3.613	69	0.044	1
hsa-miR-3174	miRNA	0.296	6	0.161	3	0.176	3	0.107	2	0	0	0	0	0	0	0	0
hsa-miR-3175	miRNA	0	0	0.054	1	0.059	1	0	0	0	0	0	0	0	0	0	0
hsa-miR-3176	miRNA	0.543	11	0.161	3	0.352	6	0.32	6	0	0	0	0	0	0	0	0
hsa-miR-3177-3p	miRNA	0.049	1	0	0	0.117	2	0.053	1	0	0	4.876	104	0	0	0	0
hsa-miR-3177-5p	miRNA	0.79	16	0.269	5	0.704	12	0.427	8	0	0	0	0	0	0	0	0
hsa-miR-3179	miRNA	0	0	0	0	0	0	0.107	2	0	0	0	0	0	0	0	0
hsa-miR-3180	miRNA	0.296	6	0.161	3	0.352	6	0.427	8	5.966	115	0.281	6	0	0	0	0
hsa-miR-3180-3p	miRNA	0.741	15	0.484	9	1.114	19	0.053	1	0	0	0.563	12	1.361	26	0.044	1
hsa-miR-3181	miRNA	0.099	2	0.107	2	0	0	0.053	1	0	0	2.251	48	0	0	0	0
hsa-miR-3182	miRNA	0	0	0	0	0	0	0	0	0	0	0	0	0.052	1	0	0
hsa-miR-3184-3p	miRNA	0.939	19	65.601	1221	1.994	34	0.16	3	0	0	0	0	216.047	4126	0	0
hsa-miR-3184-5p	miRNA	0.198	4	0.107	2	0.059	1	0.053	1	0	0	0	0	0	0	0	0
hsa-miR-3186-3p	miRNA	0	0	0	0	0.059	1	0	0	0	0	0	0	0	0	0	0
hsa-miR-3186-5p	miRNA	0.148	3	0.054	1	0.059	1	0.107	2	0	0	0	0	0	0	0	0
hsa-miR-3187-3p	miRNA	10.523	213	11.122	207	9.737	166	9.712	182	5.966	115	16.224	346	13.614	260	1.851	42
hsa-miR-3188	miRNA	0.939	19	0.591	11	1.173	20	1.547	29	0	0	2.86	61	0.733	14	0	0
hsa-miR-3192-3p	miRNA	0	0	0	0	0	0	0.16	3	0	0	0	0	0	0	0	0
hsa-miR-3192-5p	miRNA	0	0	0.054	1	0	0	0.053	1	0	0	0	0	0	0	0	0
hsa-miR-3193	miRNA	0	0	0	0	0.059	1	0.053	1	0	0	0	0	0	0	0	0
hsa-miR-3194-3p	miRNA	8.497	172	5.534	103	17.303	295	7.737	145	0	0	0	0	0	0	0	0
hsa-miR-3194-5p	miRNA	0.247	5	0.161	3	0.704	12	0	0	0	0	0	0	0	0	0	0
hsa-miR-3199	miRNA	0.049	1	0	0	0	0	0.053	1	0	0	0	0	0	0	0	0
hsa-miR-32-3p	miRNA	0.988	20	1.343	25	0.938	16	0.427	8	0	0	0	0	0	0	0	0
hsa-miR-32-5p	miRNA	218.949	4432	231.834	4315	240.425	4099	304.535	5707	0	0	0.141	3	0.209	4	0.044	1
hsa-miR-3200-3p	miRNA	0.494	10	0	0	0.587	10	0.107	2	0	0	0	0	0	0	0	0
hsa-miR-3202	miRNA	0	0	0	0	0.176	3	0	0	0	0	0	0	0.943	18	0	0
hsa-miR-320a-3p	miRNA	231.645	4689	311.834	5804	269.342	4592	377.801	7080	53.95	1040	361.095	7701	104.672	1999	25.436	577
hsa-miR-320a-5p	miRNA	0	0	0.054	1	0	0	0.053	1	0	0	0	0	0	0	0	0
hsa-miR-320b	miRNA	1.531	31	7.146	133	5.396	92	6.03	113	0.156	3	7.315	156	1.152	22	0.044	1
hsa-miR-320c	miRNA	2.47	50	4.567	85	4.575	78	5.71	107	3.372	65	5.58	119	4.556	87	1.278	29
hsa-miR-320d	miRNA	0.099	2	0.376	7	0.411	7	0.427	8	2.231	43	3.704	79	0.628	12	0	0
hsa-miR-320e	miRNA	0	0	0	0	0	0	0	0	0	0	0	0	0	0	0.044	1
hsa-miR-324-3p	miRNA	2.766	56	2.364	44	1.466	25	2.828	53	0.83	16	0	0	0.052	1	0	0
hsa-miR-324-5p	miRNA	12.153	246	6.608	123	5.631	96	6.617	124	0	0	0.656	14	2.042	39	0.044	1
hsa-miR-326	miRNA	37.891	767	36.266	675	32.495	554	43.063	807	3.579	69	16.786	358	34.036	650	4.1	93
hsa-miR-328-3p	miRNA	11.511	233	6.232	116	9.033	154	5.71	107	7.729	149	23.492	501	52.729	1007	3.394	77
hsa-miR-330-3p	miRNA	8.892	180	7.952	148	6.1	104	8.004	150	0	0	0	0	1.676	32	0	0
hsa-miR-330-5p	miRNA	6.867	139	4.083	76	5.338	91	5.656	106	0	0	0	0	0	0	0	0
hsa-miR-331-3p	miRNA	7.064	143	7.898	147	7.156	122	9.498	178	0	0	0.469	10	0.628	12	0.044	1
hsa-miR-331-5p	miRNA	2.717	55	2.31	43	4.34	74	4.482	84	0	0	0.75	16	1.309	25	0	0
hsa-miR-335-3p	miRNA	37.051	750	33.15	617	30.676	523	55.71	1044	5.343	103	37.183	793	25.658	490	0	0
hsa-miR-335-5p	miRNA	36.607	741	45.829	853	31.908	544	39.594	742	0	0	0	0	1.047	20	0.044	1
hsa-miR-337-3p	miRNA	0	0	0	0	0	0	0	0	0.156	3	0	0	0	0	0	0
hsa-miR-338-3p	miRNA	0.099	2	0.698	13	0.528	9	0.587	11	0	0	0	0	0	0	0	0
hsa-miR-338-5p	miRNA	0.741	15	2.095	39	0.938	16	1.387	26	0	0	0.469	10	0	0	0	0
hsa-miR-339-3p	miRNA	95.197	1927	53.781	1001	58.772	1002	54.322	1018	1.66	32	13.363	285	14.714	281	2.689	61
hsa-miR-339-5p	miRNA	49.599	1004	31.968	595	44.871	765	72.252	1354	1.349	26	0.516	11	2.618	50	0	0
hsa-miR-33a-3p	miRNA	0	0	0.107	2	0	0	0	0	0	0	0	0	0	0	0	0
hsa-miR-33a-5p	miRNA	1042.77	21108	1553.15	28908	1167.7	19908	1343.54	25178	0	0	0.375	8	0.628	12	0.441	10
hsa-miR-33b-3p	miRNA	0	0	0	0	0.059	1	0.053	1	0	0	0	0	0	0	0	0
hsa-miR-33b-5p	miRNA	0.494	10	0.591	11	0.587	10	0.854	16	0	0	0	0	0	0	0	0
hsa-miR-340-3p	miRNA	9.485	192	4.459	83	4.81	82	6.617	124	0.052	1	0.094	2	3.508	67	0	0
hsa-miR-340-5p	miRNA	383.308	7759	420.632	7829	352.456	6009	267.235	5008	2.127	41	20.444	436	2.618	50	0.044	1
hsa-miR-342-3p	miRNA	1338.79	27100	1978.4	36823	1330.4	22682	2007.89	37628	428.331	8257	905.339	19308	1008.81	19266	115.453	2619
hsa-miR-342-5p	miRNA	61.11	1237	43.143	803	47.569	811	38.1	714	109.663	2114	203.312	4336	300.56	5740	38.132	865
hsa-miR-345-5p	miRNA	98.31	1990	60.067	1118	54.725	933	27.214	510	4.357	84	8.581	183	28.537	545	0.132	3
hsa-miR-346	miRNA	0.049	1	0	0	0	0	0	0	0	0	0	0	0	0	0	0
hsa-miR-34a-5p	miRNA	0.296	6	0.537	10	0.587	10	0.747	14	3.216	62	1.125	24	0.314	6	0.176	4
hsa-miR-3529-3p	miRNA	93.122	1885	89.617	1668	2185.88	37267	22.198	416	2.438	47	17.677	377	457.542	8738	0	0
hsa-miR-3605-3p	miRNA	2.025	41	0.967	18	1.525	26	1.281	24	4.254	82	11.16	238	20.893	399	0	0
hsa-miR-3605-5p	miRNA	0.593	12	1.182	22	0.88	15	0.374	7	0	0	1.313	28	0	0	0	0
hsa-miR-361-3p	miRNA	4.644	94	3.6	67	2.933	50	7.15	134	0	0	0.938	20	0	0	0	0
hsa-miR-361-5p	miRNA	184.12	3727	133.62	2487	143.293	2443	195.624	3666	23.188	447	88.855	1895	35.345	675	1.367	31
hsa-miR-3610	miRNA	0	0	0	0	0	0	0.053	1	0	0	0	0	0	0	0	0
hsa-miR-3611	miRNA	0.049	1	0	0	0	0	0	0	0	0	0	0	0	0	0	0
hsa-miR-3613-5p	miRNA	670.728	13577	482.526	8981	398.852	6800	311.205	5832	2.749	53	19.834	423	12.829	245	0.264	6
hsa-miR-3614-3p	miRNA	0.198	4	0.269	5	0.059	1	0.48	9	0	0	0	0	0	0	0	0
hsa-miR-3614-5p	miRNA	0.247	5	0.107	2	0.117	2	0.213	4	0	0	0	0	1.885	36	0	0
hsa-miR-3615	miRNA	33.494	678	15.473	288	22.641	386	42.796	802	6.121	118	32.213	687	61.264	1170	13.489	306
hsa-miR-3619-3p	miRNA	0	0	0.107	2	0.176	3	0.107	2	0	0	0	0	0	0	0	0
hsa-miR-3619-5p	miRNA	0.099	2	0.054	1	0	0	0.053	1	0	0	0	0	0	0	0	0
hsa-miR-362-3p	miRNA	0.346	7	0.537	10	0.352	6	0.8	15	0	0	0	0	0	0	0	0
hsa-miR-362-5p	miRNA	73.707	1492	48.677	906	38.947	664	62.647	1174	0.052	1	13.926	297	14.085	269	0.044	1
hsa-miR-3620-3p	miRNA	0.049	1	0	0	0	0	0	0	0	0	0	0	0	0	0	0
hsa-miR-3620-5p	miRNA	0	0	0	0	0	0	0.16	3	0	0	0	0	0	0	0	0
hsa-miR-363-3p	miRNA	0.099	2	0.161	3	0.235	4	0.107	2	0.156	3	0	0	0.157	3	0.088	2
hsa-miR-3648	miRNA	0	0	0	0	0.117	2	0	0	0	0	0	0	0	0	0	0
hsa-miR-3651	miRNA	0.049	1	0.161	3	0.352	6	0.534	10	0	0	0	0	0	0	0	0
hsa-miR-3655	miRNA	0.099	2	0	0	0	0	0	0	0	0	0	0	0	0	0	0
hsa-miR-3657	miRNA	0	0	0.107	2	0	0	0	0	0	0	0	0	0	0	0	0
hsa-miR-365a-3p	miRNA	0.148	3	0	0	0	0	0.053	1	0	0	0	0	0	0	0	0
hsa-miR-365b-3p	miRNA	0	0	0.161	3	0	0	0	0	0	0	0	0	0.262	5	0	0
hsa-miR-365b-5p	miRNA	0	0	0	0	0.059	1	0	0	0	0	0	0	0	0	0	0
hsa-miR-3661	miRNA	0.692	14	2.31	43	1.76	30	0.107	2	0	0	0	0	0.105	2	0	0
hsa-miR-3662	miRNA	2.124	43	2.901	54	2.463	42	0.907	17	0	0	0	0	0	0	0	0
hsa-miR-3667-3p	miRNA	2.569	52	4.244	79	1.877	32	4.269	80	0	0	0.703	15	0.157	3	0	0
hsa-miR-3667-5p	miRNA	0	0	0.107	2	0.176	3	0.053	1	0	0	0	0	0	0	0	0
hsa-miR-3677-3p	miRNA	0.346	7	0.054	1	0	0	0.107	2	0	0	0	0	0	0	0	0
hsa-miR-3677-5p	miRNA	0.049	1	0	0	0.059	1	0.053	1	0	0	0	0	0	0	0	0
hsa-miR-3678-3p	miRNA	0	0	0.107	2	0.235	4	0	0	0	0	0	0	0	0	0	0
hsa-miR-3678-5p	miRNA	0	0	0.215	4	0	0	0	0	0	0	0	0	0	0	0	0
hsa-miR-3679-3p	miRNA	0	0	0	0	0	0	0.213	4	0	0	0	0	0	0	0	0
hsa-miR-3679-5p	miRNA	0.099	2	0.161	3	0.293	5	0.16	3	0	0	0	0	0.785	15	0	0
hsa-miR-3680-3p	miRNA	0	0	0.054	1	0	0	0	0	0	0	0	0	0	0	0	0
hsa-miR-3680-5p	miRNA	0	0	0.054	1	0	0	0.053	1	0	0	0	0	0.367	7	0	0
hsa-miR-3681-5p	miRNA	0.099	2	0.322	6	0.117	2	0	0	0	0	0	0	0	0	0	0
hsa-miR-3682-3p	miRNA	0.049	1	0	0	0	0	0	0	0	0	0	0	0	0	0	0
hsa-miR-3682-5p	miRNA	0.049	1	0.054	1	0	0	0	0	0	0	0	0	0	0	0	0
hsa-miR-3684	miRNA	0.247	5	0.376	7	0.235	4	0.374	7	0	0	0	0	0	0	0	0
hsa-miR-3685	miRNA	0	0	0.054	1	0	0	0	0	0	0	0	0	0	0	0	0
hsa-miR-3688-3p	miRNA	0.049	1	0.269	5	0.469	8	0.48	9	0	0	0.047	1	0	0	0	0
hsa-miR-3688-5p	miRNA	0.099	2	0	0	0.059	1	0	0	0	0	0	0	0	0	0	0
hsa-miR-369-3p	miRNA	0	0	0.591	11	0	0	0.053	1	0	0	0	0	0	0	0	0
hsa-miR-369-5p	miRNA	0	0	0	0	0	0	0	0	0.052	1	0	0	0	0	0	0
hsa-miR-3690	miRNA	0.395	8	0.161	3	0.293	5	0.16	3	0	0	0	0	0	0	0	0
hsa-miR-3691-3p	miRNA	0	0	0	0	0	0	0.107	2	0	0	0	0	0	0	0	0
hsa-miR-374a-3p	miRNA	68.076	1378	92.089	1714	57.892	987	48.986	918	0	0	1.922	41	0	0	0	0
hsa-miR-374a-5p	miRNA	40.164	813	56.521	1052	37.422	638	47.972	899	0	0	0	0	0	0	0	0
hsa-miR-374b-3p	miRNA	37.15	752	52.062	969	35.075	598	49.573	929	0	0	1.922	41	0.052	1	0	0
hsa-miR-374b-5p	miRNA	1.927	39	72.21	1344	105.93	1806	72.198	1353	0.052	1	3.095	66	0	0	2.028	46
hsa-miR-374c-3p	miRNA	140.103	2836	61.679	1148	1.232	21	104.162	1952	12.398	239	12.519	267	22.149	423	0.044	1
hsa-miR-374c-5p	miRNA	0.198	4	0.215	4	0	0	0.107	2	0	0	0	0	0	0	0	0
hsa-miR-375-3p	miRNA	0.247	5	0.107	2	0.293	5	0.107	2	0	0	0	0	0.681	13	0	0
hsa-miR-376a-3p	miRNA	0.049	1	0.107	2	0	0	0	0	0	0	0	0	0	0	0	0
hsa-miR-376b-3p	miRNA	0.049	1	0	0	0	0	0	0	0	0	0	0	0	0	0	0
hsa-miR-376c-3p	miRNA	0.049	1	0.054	1	0.059	1	0	0	0	0	0	0	0	0	0	0
hsa-miR-378a-3p	miRNA	2365.31	47879	2123.63	39526	2008.86	34249	2052.24	38459	70.239	1354	269.332	5744	292.967	5595	29.976	680
hsa-miR-378a-5p	miRNA	40.361	817	30.302	564	32.671	557	35.325	662	0	0	8.159	174	24.977	477	3.527	80
hsa-miR-378b	miRNA	0.346	7	0.43	8	0.352	6	0.64	12	0	0	0	0	0.105	2	0	0
hsa-miR-378c	miRNA	0.642	13	0.322	6	0.293	5	0.427	8	0	0	0	0	0	0	0	0
hsa-miR-378d	miRNA	0.741	15	0.107	2	0.587	10	1.121	21	0	0	0.094	2	0.157	3	0	0
hsa-miR-378e	miRNA	0.296	6	0.537	10	0.411	7	0.694	13	0	0	0	0	0	0	0.044	1
hsa-miR-378f	miRNA	0.79	16	0.107	2	0.528	9	0.267	5	0	0	0.047	1	0.105	2	0	0
hsa-miR-378g	miRNA	0.593	12	0.645	12	0.821	14	0.374	7	0	0	0.047	1	0.471	9	0.044	1
hsa-miR-378i	miRNA	0.099	2	0.054	1	0.117	2	0	0	0	0	0.047	1	0	0	0	0
hsa-miR-381-3p	miRNA	0.049	1	0	0	0	0	0	0	0	0	0	0	0	0	0	0
hsa-miR-382-5p	miRNA	0	0	0	0	0	0	0	0	0.052	1	0	0	0	0	0	0
hsa-miR-3908	miRNA	0	0	0	0	0.059	1	0	0	0	0	0	0	0	0	0	0
hsa-miR-3909	miRNA	6.867	139	4.244	79	4.34	74	4.696	88	0	0	0.985	21	0	0	0	0
hsa-miR-3911	miRNA	0	0	0.215	4	0.293	5	0	0	0	0	0	0	0	0	0	0
hsa-miR-3912-3p	miRNA	15.858	321	14.882	277	15.074	257	8.431	158	0	0	0	0	0	0	0	0
hsa-miR-3912-5p	miRNA	0	0	0.107	2	0.117	2	0	0	0	0	0	0	0	0	0	0
hsa-miR-3913-3p	miRNA	1.976	40	0.322	6	1.114	19	0.747	14	0	0	0	0	0	0	0	0
hsa-miR-3913-5p	miRNA	0	0	0.537	10	0	0	0	0	0	0	0	0	0	0	0	0
hsa-miR-3916	miRNA	0.593	12	0.537	10	0.176	3	0.16	3	0	0	0	0	0	0	0	0
hsa-miR-3918	miRNA	0.049	1	0	0	0	0	0.16	3	0	0	0	0	0	0	0	0
hsa-miR-3929	miRNA	0.049	1	0	0	0.117	2	0	0	0	0	0	0	0	0	0	0
hsa-miR-3939	miRNA	2.47	50	0.913	17	1.29	22	0.854	16	0	0	0	0	0	0	0	0
hsa-miR-3940-3p	miRNA	0.099	2	0.376	7	0.352	6	0.694	13	0.467	9	1.078	23	1.78	34	0	0
hsa-miR-3940-5p	miRNA	0.049	1	0	0	0.059	1	0	0	0	0	1.547	33	0	0	0	0
hsa-miR-3944-3p	miRNA	2.371	48	1.075	20	1.525	26	0.587	11	0	0	1.5	32	0.471	9	0	0
hsa-miR-3944-5p	miRNA	0.099	2	0.43	8	0.235	4	0.267	5	0	0	0	0	0.576	11	0.044	1
hsa-miR-3960	miRNA	0	0	0	0	0	0	0.053	1	0	0	0	0	0	0	0	0
hsa-miR-409-3p	miRNA	0.049	1	0.054	1	0	0	0	0	0.052	1	0	0	0	0	0	0
hsa-miR-410-3p	miRNA	0	0	0.054	1	0	0	0	0	0	0	0	0	0	0	0	0
hsa-miR-411-5p	miRNA	0.346	7	0.107	2	0.059	1	0	0	0.519	10	0	0	0	0	0	0
hsa-miR-421	miRNA	25.936	525	18.59	346	14.194	242	17.396	326	8.092	156	16.88	360	15.237	291	0	0
hsa-miR-423-3p	miRNA	6571.77	133027	4189.13	77970	4389.89	74843	3849.19	72134	1198.67	23107	3300.54	70390	4790.79	91493	195.376	4432
hsa-miR-423-5p	miRNA	67.335	1363	0.913	17	83.7	1427	37.033	694	111.894	2157	284.946	6077	1.571	30	1.94	44
hsa-miR-424-3p	miRNA	78.845	1596	67.589	1258	65.928	1124	44.397	832	11.776	227	43.654	931	67.39	1287	0	0
hsa-miR-424-5p	miRNA	228.187	4619	225.924	4205	172.269	2937	177.321	3323	0.052	1	5.861	125	4.189	80	0	0
hsa-miR-425-3p	miRNA	104.929	2124	99.772	1857	75.547	1288	147.758	2769	0	0	10.269	219	10.472	200	1.322	30
hsa-miR-425-5p	miRNA	1036.65	20984	730.263	13592	694.882	11847	853.733	15999	14.421	278	84.026	1792	118.234	2258	5.29	120
hsa-miR-4284	miRNA	0.148	3	0.107	2	0.235	4	0.16	3	0	0	1.407	30	0	0	0.088	2
hsa-miR-4286	miRNA	1.729	35	1.343	25	2.17	37	14.301	268	0	0	0.047	1	1.466	28	0	0
hsa-miR-429	miRNA	0.346	7	0.86	16	0.235	4	0.213	4	0	0	0	0	0	0	0	0
hsa-miR-4306	miRNA	0.198	4	0.054	1	0.117	2	0.107	2	0	0	0.094	2	0.209	4	0	0
hsa-miR-432-5p	miRNA	0	0	0	0	0	0	0	0	0.052	1	0	0	0	0	0	0
hsa-miR-4325	miRNA	0	0	0	0	0	0	0	0	0	0	0	0	0.052	1	0	0
hsa-miR-4326	miRNA	4.644	94	2.31	43	1.525	26	2.615	49	0	0	2.063	44	1.414	27	1.719	39
hsa-miR-4420	miRNA	0.099	2	0	0	0.176	3	0.053	1	0	0	0	0	0.052	1	0	0
hsa-miR-4421	miRNA	0.494	10	0.215	4	0.645	11	0.053	1	0	0	0	0	0	0	0	0
hsa-miR-4422	miRNA	0.099	2	0.269	5	0.059	1	0.16	3	0	0	0	0	0	0	0	0
hsa-miR-4423-5p	miRNA	0.198	4	0.107	2	0.059	1	0.107	2	0	0	0	0	0	0	0	0
hsa-miR-4425	miRNA	0.296	6	0.269	5	0.176	3	0.267	5	0	0	0	0	0	0	0	0
hsa-miR-4429	miRNA	0	0	0.054	1	0	0	0.053	1	0	0	0	0	0.052	1	0	0
hsa-miR-4430	miRNA	0	0	0	0	0.059	1	0	0	0	0	0	0	0	0	0	0
hsa-miR-4433a-3p	miRNA	0	0	0	0	0	0	0	0	0	0	0	0	0	0	0.044	1
hsa-miR-4433b-5p	miRNA	0	0	0	0	0	0	0	0	0	0	0	0	0.052	1	0	0
hsa-miR-4434	miRNA	0	0	0	0	0	0	0.053	1	0	0	0	0	0	0	0	0
hsa-miR-4435	miRNA	0.494	10	0.215	4	0.235	4	0.907	17	0	0	0	0	0.995	19	0	0
hsa-miR-4437	miRNA	0.049	1	0.054	1	0	0	0	0	0	0	0	0	0	0	0	0
hsa-miR-4440	miRNA	0.494	10	0.537	10	0.587	10	0.587	11	0	0	0.891	19	1.414	27	0	0
hsa-miR-4443	miRNA	0.247	5	0.215	4	0.235	4	0.427	8	0.052	1	0	0	0	0	0	0
hsa-miR-4446-3p	miRNA	0.296	6	0.322	6	0.293	5	0	0	3.268	63	0	0	0.471	9	0	0
hsa-miR-4448	miRNA	0	0	0	0	0	0	0	0	0	0	0	0	0.052	1	0	0
hsa-miR-4451	miRNA	0	0	0.107	2	0.059	1	0	0	0	0	0	0	0	0	0	0
hsa-miR-4454	miRNA	0.198	4	0.376	7	0.469	8	0.267	5	4.098	79	7.69	164	2.566	49	0	0
hsa-miR-4455	miRNA	0.049	1	0.054	1	0	0	0.107	2	0	0	0.047	1	0.314	6	0	0
hsa-miR-4457	miRNA	0	0	0.054	1	0	0	0.053	1	0	0	0	0	0	0	0	0
hsa-miR-4466	miRNA	0.247	5	0.269	5	0.411	7	0.107	2	3.372	65	0	0	0	0	0	0
hsa-miR-4470	miRNA	0.049	1	0.269	5	0.059	1	0.107	2	0	0	0	0	0	0	0	0
hsa-miR-4473	miRNA	1.284	26	1.451	27	1.466	25	3.575	67	0	0	0	0	0	0	0	0
hsa-miR-4474-3p	miRNA	1.284	26	0.645	12	0.645	11	1.014	19	0	0	0	0	0	0	0	0
hsa-miR-4474-5p	miRNA	0	0	0	0	0	0	0.053	1	0	0	0	0	0	0	0	0
hsa-miR-4476	miRNA	0	0	0.054	1	0	0	0	0	0	0	0	0	0	0	0	0
hsa-miR-4477a	miRNA	0	0	0.054	1	0	0	0	0	0	0	0	0	0	0	0	0
hsa-miR-4477b	miRNA	0	0	0	0	0	0	0.053	1	0	0	0	0	0	0	0	0
hsa-miR-4479	miRNA	1.531	31	0.645	12	0.997	17	1.067	20	0	0	0	0	0.052	1	0	0
hsa-miR-4482-3p	miRNA	0.049	1	0.054	1	0	0	0.107	2	0	0	0	0	0	0	0	0
hsa-miR-4482-5p	miRNA	0.988	20	0.698	13	0.938	16	0.267	5	0	0	0	0	0	0	0	0
hsa-miR-4484	miRNA	1.136	23	1.719	32	1.114	19	1.014	19	0	0	0	0	0	0	0	0
hsa-miR-4485-3p	miRNA	0	0	0	0	0	0	0	0	0	0	0	0	1.1	21	0	0
hsa-miR-4485-5p	miRNA	0	0	0.107	2	0	0	0	0	0	0	0	0	0	0	0	0
hsa-miR-4488	miRNA	0	0	0	0	0	0	0	0	0	0	1.172	25	0.052	1	0	0
hsa-miR-4489	miRNA	0	0	0	0	0.117	2	0	0	0	0	0	0	0.262	5	0	0
hsa-miR-4492	miRNA	0	0	0.054	1	0	0	0	0	0	0	0	0	0	0	0	0
hsa-miR-4498	miRNA	0	0	0	0	0.059	1	0	0	0	0	0	0	0	0	0	0
hsa-miR-449a	miRNA	20.354	412	16.548	308	18.535	316	23.853	447	0	0	1.547	33	1.257	24	0	0
hsa-miR-449b-5p	miRNA	0	0	0.054	1	0	0	0	0	0	0	0	0	0	0	0	0
hsa-miR-449c-5p	miRNA	0	0	0.107	2	0	0	0.053	1	0	0	0	0	0	0	0	0
hsa-miR-4502	miRNA	0.099	2	0	0	0	0	0	0	0	0	0	0	0	0	0	0
hsa-miR-4504	miRNA	0.099	2	0	0	0	0	0.053	1	0	0	0	0	0	0	0	0
hsa-miR-450a-1-3p	miRNA	4.94	100	3.546	66	2.463	42	2.508	47	0	0	0	0	1.204	23	0	0
hsa-miR-450a-2-3p	miRNA	0.296	6	0.161	3	0.176	3	0.16	3	0	0	0	0	0	0	0	0
hsa-miR-450a-5p	miRNA	96.778	1959	131.901	2455	87.219	1487	83.885	1572	0	0	1.969	42	2.356	45	0	0
hsa-miR-450b-3p	miRNA	0	0	0	0	0.059	1	0	0	0	0	0	0	0	0	0	0
hsa-miR-450b-5p	miRNA	4.841	98	6.125	114	2.874	49	2.775	52	0	0	0.047	1	0.052	1	0	0
hsa-miR-4511	miRNA	0	0	0	0	0.059	1	0	0	0	0	0	0	0	0	0	0
hsa-miR-4517	miRNA	1.383	28	0.806	15	0.763	13	1.121	21	0	0	0	0	0.524	10	0.044	1
hsa-miR-4518	miRNA	2.371	48	1.88	35	2.346	40	0.8	15	0	0	0	0	0	0	0	0
hsa-miR-451a	miRNA	67.977	1376	71.941	1339	76.075	1297	112.593	2110	74.025	1427	110.518	2357	162.062	3095	143.402	3253
hsa-miR-4521	miRNA	147.02	2976	153.714	2861	109.508	1867	178.441	3344	0.934	18	3.142	67	6.912	132	1.367	31
hsa-miR-4522	miRNA	0.247	5	0	0	0	0	0.107	2	0	0	0	0	0	0	0	0
hsa-miR-4523	miRNA	0	0	0.054	1	0	0	0	0	0	0	0	0	0	0	0	0
hsa-miR-4524a-3p	miRNA	0	0	0.107	2	0	0	0	0	0	0	0	0	0	0	0	0
hsa-miR-4526	miRNA	0	0	0.054	1	0	0	0	0	0	0	0	0	0	0	0	0
hsa-miR-4529-3p	miRNA	0.395	8	0.107	2	0.059	1	0.053	1	0	0	0	0	0	0	0	0
hsa-miR-4533	miRNA	0.049	1	0.43	8	0	0	0	0	0	0	0	0	0	0	0	0
hsa-miR-454-3p	miRNA	80.574	1631	73.929	1376	97.015	1654	154.215	2890	8.196	158	25.273	539	14.452	276	0	0
hsa-miR-454-5p	miRNA	3.458	70	2.203	41	3.285	56	1.387	26	0	0	4.361	93	2.094	40	0.044	1
hsa-miR-455-3p	miRNA	0.296	6	0.591	11	1.056	18	1.387	26	0.052	1	1.641	35	0	0	0	0
hsa-miR-455-5p	miRNA	0.198	4	0.215	4	0.176	3	0.32	6	0	0	0	0	0	0	0	0
hsa-miR-4634	miRNA	0	0	0	0	0	0	0	0	0	0	0	0	0.052	1	0	0
hsa-miR-4638-3p	miRNA	3.458	70	3.439	64	3.813	65	1.868	35	1.971	38	0	0	1.466	28	0	0
hsa-miR-4638-5p	miRNA	0.198	4	0.054	1	0	0	0.053	1	0	0	0	0	0	0	0	0
hsa-miR-4639-5p	miRNA	0.049	1	0.107	2	0.059	1	0.053	1	0	0	0	0	0	0	0	0
hsa-miR-4642	miRNA	0	0	0	0	0.117	2	0.107	2	0	0	0	0	0	0	0	0
hsa-miR-4645-3p	miRNA	0.099	2	0.215	4	0.059	1	0.16	3	0	0	0	0	0	0	0	0
hsa-miR-4647	miRNA	0.049	1	0	0	0	0	0	0	0	0	0	0	0	0	0	0
hsa-miR-4659a-3p	miRNA	2.174	44	2.525	47	1.818	31	3.095	58	0	0	2.157	46	0	0	0	0
hsa-miR-4660	miRNA	0	0	0.107	2	0	0	0	0	0	0	0	0	0	0	0	0
hsa-miR-4661-3p	miRNA	0	0	0	0	0	0	0.053	1	0	0	0	0	0	0	0	0
hsa-miR-4661-5p	miRNA	0.198	4	0.054	1	0.059	1	0.16	3	0	0	1.36	29	0	0	0	0
hsa-miR-4662a-3p	miRNA	0.148	3	0.215	4	0.059	1	0.053	1	0	0	0	0	0	0	0	0
hsa-miR-4662a-5p	miRNA	11.412	231	9.187	171	6.041	103	2.134	40	1.556	30	3.095	66	4.503	86	0	0
hsa-miR-4662b	miRNA	0	0	0.161	3	0.176	3	0.053	1	0	0	0	0	0	0	0	0
hsa-miR-4664-5p	miRNA	0	0	0.054	1	0	0	0	0	0	0	0	0	0	0	0	0
hsa-miR-4665-5p	miRNA	0.198	4	0	0	0	0	0	0	0	0	0	0	0.524	10	0	0
hsa-miR-4667-3p	miRNA	0.049	1	0	0	0.117	2	0	0	0	0	0	0	0	0	0	0
hsa-miR-4670-3p	miRNA	0	0	0.161	3	0	0	0	0	0	0	0	0	0	0	0	0
hsa-miR-4670-5p	miRNA	0.099	2	0	0	0	0	0	0	0	0	0	0	0	0	0	0
hsa-miR-4674	miRNA	0	0	0.054	1	0	0	0	0	0	0	0	0	0	0	0	0
hsa-miR-4676-5p	miRNA	0	0	0.054	1	0.117	2	0	0	0	0	0	0	0	0	0	0
hsa-miR-4677-3p	miRNA	0.543	11	0.43	8	1.525	26	0.534	10	0	0	0	0	0	0	0	0
hsa-miR-4677-5p	miRNA	6.274	127	4.03	75	3.461	59	1.654	31	0	0	0	0	0.785	15	0	0
hsa-miR-4680-3p	miRNA	0.049	1	0.107	2	0	0	0	0	0	0	0	0	0	0	0	0
hsa-miR-4680-5p	miRNA	0	0	0.054	1	0	0	0.053	1	0	0	0	0	0	0	0	0
hsa-miR-4682	miRNA	0	0	0	0	0.117	2	0	0	0	0	0	0	0	0	0	0
hsa-miR-4685-3p	miRNA	0.445	9	0.591	11	0.411	7	0.427	8	1.764	34	2.063	44	2.932	56	1.455	33
hsa-miR-4687-3p	miRNA	0	0	0	0	0.059	1	0.32	6	0	0	0	0	0	0	0	0
hsa-miR-4687-5p	miRNA	0.148	3	0.054	1	0.117	2	0	0	0	0	0	0	0.052	1	0	0
hsa-miR-4689	miRNA	0	0	0.054	1	0	0	0	0	0	0	0	0	0	0	0	0
hsa-miR-4690-3p	miRNA	0	0	0	0	0.117	2	0.16	3	0	0	0	0	0	0	0	0
hsa-miR-4691-3p	miRNA	0	0	0	0	0.059	1	0	0	0	0	0	0	0	0	0	0
hsa-miR-4691-5p	miRNA	0.049	1	0.107	2	0.235	4	0.16	3	0	0	0	0	0	0	0	0
hsa-miR-4695-3p	miRNA	0.296	6	0.054	1	0	0	0.213	4	0	0	0	0	0.733	14	0	0
hsa-miR-4697-3p	miRNA	0.642	13	0.161	3	0.411	7	1.708	32	0	0	0	0	1.257	24	1.896	43
hsa-miR-4697-5p	miRNA	0.049	1	0.054	1	0.352	6	1.121	21	0	0	0	0	1.257	24	0	0
hsa-miR-4700-5p	miRNA	0	0	0	0	0	0	0.107	2	0	0	0	0	0	0	0	0
hsa-miR-4701-5p	miRNA	0.049	1	0.054	1	0	0	0	0	0	0	0	0	0	0	0	0
hsa-miR-4707-3p	miRNA	0.198	4	0.322	6	0.176	3	0.64	12	0	0	0	0	0	0	0	0
hsa-miR-4707-5p	miRNA	0.198	4	0.43	8	0.059	1	0.053	1	0	0	0	0	1.571	30	0	0
hsa-miR-4712-5p	miRNA	0	0	0.054	1	0	0	0.053	1	0	0	0	0	0	0	0	0
hsa-miR-4716-3p	miRNA	0	0	0	0	0	0	0.267	5	0	0	0	0	0	0	0	0
hsa-miR-4716-5p	miRNA	0.049	1	0	0	0.059	1	0	0	0	0	0	0	0	0	0	0
hsa-miR-4717-3p	miRNA	0.099	2	0.107	2	0.059	1	0.32	6	0	0	0	0	0	0	0	0
hsa-miR-4717-5p	miRNA	0.049	1	0.107	2	0.059	1	0	0	0	0	0	0	0	0	0	0
hsa-miR-4719	miRNA	0.741	15	0.322	6	0.293	5	0.48	9	0	0	0	0	0	0	0	0
hsa-miR-4722-5p	miRNA	0.049	1	0	0	0.059	1	0	0	0	0	0	0	0	0	0	0
hsa-miR-4723-3p	miRNA	0	0	0	0	0	0	0.213	4	0	0	0	0	0	0	0	0
hsa-miR-4723-5p	miRNA	0.148	3	0.054	1	0.059	1	0	0	0	0	0	0	0	0	0	0
hsa-miR-4726-3p	miRNA	0	0	0.054	1	0	0	0	0	0	0	0	0	0	0	0	0
hsa-miR-4726-5p	miRNA	0.593	12	0.484	9	0.704	12	0.107	2	0	0	1.735	37	0	0	0	0
hsa-miR-4728-3p	miRNA	0.148	3	0	0	0.176	3	0.053	1	0	0	0	0	0	0	0	0
hsa-miR-4730	miRNA	0.049	1	0.054	1	0.176	3	0	0	0	0	0	0	0	0	0	0
hsa-miR-4731-3p	miRNA	0	0	0	0	0.117	2	0	0	0	0	0	0	0	0	0	0
hsa-miR-4732-3p	miRNA	3.014	61	5.05	94	4.282	73	5.763	108	0	0	3.845	82	7.278	139	5.907	134
hsa-miR-4732-5p	miRNA	0	0	0	0	0.059	1	0	0	0	0	0	0	0	0	0.044	1
hsa-miR-4733-3p	miRNA	0	0	0	0	0	0	0.053	1	0	0	0	0	0	0	0	0
hsa-miR-4733-5p	miRNA	0.099	2	0	0	0	0	0	0	0	0	0	0	0	0	0	0
hsa-miR-4737	miRNA	0	0	0	0	0	0	0.053	1	0	0	0	0	0	0	0	0
hsa-miR-4742-3p	miRNA	0.494	10	0.215	4	0.176	3	0.587	11	0	0	0	0	0	0	0	0
hsa-miR-4742-5p	miRNA	0.049	1	0	0	0.117	2	0	0	0	0	0	0	0	0	0	0
hsa-miR-4745-3p	miRNA	0.049	1	0	0	0.059	1	0.053	1	0	0	0	0	0	0	0	0
hsa-miR-4745-5p	miRNA	0	0	0	0	0	0	0.053	1	0	0	0	0	0	0	0	0
hsa-miR-4746-5p	miRNA	0	0	0.054	1	0	0	0.053	1	0	0	0	0	0	0	0	0
hsa-miR-4747-3p	miRNA	0.247	5	0.43	8	0.059	1	0.107	2	0	0	0	0	0	0	0	0
hsa-miR-4747-5p	miRNA	0	0	0	0	0	0	0.107	2	0	0	0.422	9	0	0	0	0
hsa-miR-4748	miRNA	0	0	0.054	1	0.059	1	0.053	1	0	0	0.891	19	0	0	0	0
hsa-miR-4749-3p	miRNA	0.148	3	0.054	1	0.059	1	0.053	1	0	0	0	0	0	0	0	0
hsa-miR-4749-5p	miRNA	0.099	2	0	0	0	0	0	0	0	0	0	0	0	0	0	0
hsa-miR-4750-5p	miRNA	0	0	0.161	3	0	0	0.053	1	0	0	0	0	0	0	0	0
hsa-miR-4753-3p	miRNA	0	0	0.054	1	0	0	0.053	1	0	0	0	0	0	0	0	0
hsa-miR-4753-5p	miRNA	0	0	0	0	0	0	0.16	3	0	0	0	0	0	0	0	0
hsa-miR-4754	miRNA	0.395	8	0	0	0.235	4	0.267	5	0	0	0	0	0.576	11	0	0
hsa-miR-4755-5p	miRNA	0.148	3	0.215	4	0	0	0.107	2	0	0	0	0	0.785	15	0	0
hsa-miR-4757-5p	miRNA	0.099	2	0	0	0	0	0	0	0	0	0	0	0	0	0	0
hsa-miR-4761-5p	miRNA	0.148	3	0.161	3	0.176	3	0.053	1	0	0	0	0	0	0	0	0
hsa-miR-4762-5p	miRNA	0	0	0.054	1	0	0	0.053	1	0	0	0	0	0	0	0	0
hsa-miR-4765	miRNA	0	0	0	0	0.059	1	0	0	0	0	0	0	0	0	0	0
hsa-miR-4766-3p	miRNA	0	0	0.054	1	0.059	1	0.053	1	0	0	0	0	0	0	0	0
hsa-miR-4767	miRNA	0	0	0.107	2	0	0	0	0	0	0	0	0	0	0	0	0
hsa-miR-4772-3p	miRNA	26.282	532	43.627	812	41.234	703	27.268	511	1.712	33	9.612	205	3.456	66	1.19	27
hsa-miR-4772-5p	miRNA	7.262	147	7.414	138	7.039	120	7.417	139	0	0	0	0	0	0	0	0
hsa-miR-4775	miRNA	0.296	6	0.107	2	0.117	2	0.32	6	0	0	0	0	0	0	0	0
hsa-miR-4777-3p	miRNA	0.049	1	0	0	0	0	0	0	0	0	0	0	0	0	0	0
hsa-miR-4781-3p	miRNA	0.049	1	0	0	0.117	2	0.16	3	0	0	0	0	0	0	0	0
hsa-miR-4781-5p	miRNA	0.099	2	0	0	0	0	0	0	0	0	0	0	0	0	0	0
hsa-miR-4783-3p	miRNA	0.049	1	0.054	1	0	0	0	0	0	0	0	0	0	0	0	0
hsa-miR-4784	miRNA	0	0	0	0	0	0	0.053	1	0	0	0	0	0	0	0	0
hsa-miR-4786-3p	miRNA	0.148	3	0	0	0.059	1	0	0	0	0	0	0	0	0	0	0
hsa-miR-4786-5p	miRNA	0	0	0	0	0.059	1	0	0	0	0	0	0	0	0	0	0
hsa-miR-4787-3p	miRNA	6.669	135	4.459	83	5.22	89	6.083	114	0	0	2.298	49	5.132	98	0	0
hsa-miR-4791	miRNA	1.778	36	3.385	63	3.989	68	2.988	56	0	0	0.422	9	0	0	0	0
hsa-miR-4795-3p	miRNA	0.148	3	0.269	5	0.176	3	0.053	1	0	0	0	0	0	0	0	0
hsa-miR-4795-5p	miRNA	0.099	2	0.054	1	0	0	0	0	0	0	0	0	0	0	0	0
hsa-miR-4796-5p	miRNA	0.543	11	0.86	16	0.469	8	0.48	9	0	0	0	0	0	0	0	0
hsa-miR-4799-5p	miRNA	0.247	5	0.322	6	0.117	2	0.32	6	0	0	0	0	0	0	0	0
hsa-miR-4800-3p	miRNA	0	0	0	0	0	0	0.107	2	0	0	0	0	0	0	0	0
hsa-miR-4804-3p	miRNA	0	0	0	0	0.059	1	0	0	0	0	0	0	0	0	0	0
hsa-miR-484	miRNA	443.183	8971	306.085	5697	362.662	6183	447.811	8392	55.817	1076	281.899	6012	487.179	9304	21.424	486
hsa-miR-485-3p	miRNA	0	0	0	0	0	0	0	0	0	0	0	0	0	0	0.044	1
hsa-miR-485-5p	miRNA	0.049	1	0	0	0	0	0	0	0.052	1	0	0	0	0	0	0
hsa-miR-486-3p	miRNA	0	0	0.054	1	0.059	1	0.053	1	0	0	0	0	0.052	1	0	0
hsa-miR-486-5p	miRNA	17.982	364	23.533	438	18.066	308	32.391	607	0.311	6	20.725	442	41.576	794	31.387	712
hsa-miR-487b-3p	miRNA	0	0	0	0	0	0	0	0	0.052	1	0	0	0	0	0	0
hsa-miR-490-5p	miRNA	0	0	0	0	0	0	0	0	0	0	0	0	0.105	2	0	0
hsa-miR-491-3p	miRNA	0.346	7	0.591	11	0.645	11	0.427	8	0	0	0	0	0	0	0	0
hsa-miR-491-5p	miRNA	21.095	427	22.028	410	20.764	354	13.554	254	0	0	1.876	40	1.204	23	0.044	1
hsa-miR-497-5p	miRNA	1.087	22	0.913	17	1.056	18	0.107	2	0	0	0	0	0	0	0	0
hsa-miR-4999-5p	miRNA	0.395	8	0.967	18	0.587	10	0.427	8	0	0	0	0	0	0	0	0
hsa-miR-499a-3p	miRNA	0.148	3	0	0	0	0	0	0	0	0	0	0	0	0	0	0
hsa-miR-499a-5p	miRNA	19.514	395	25.198	469	23.11	394	24.066	451	0	0	0	0	1.466	28	0.044	1
hsa-miR-499b-5p	miRNA	0	0	0	0	0.352	6	0.16	3	0	0	0	0	0	0	0	0
hsa-miR-5000-5p	miRNA	0.148	3	0.107	2	0.117	2	0.267	5	0	0	0	0	0	0	0	0
hsa-miR-5001-3p	miRNA	4.841	98	3.331	62	2.405	41	2.188	41	0	0	0.985	21	1.361	26	0	0
hsa-miR-5001-5p	miRNA	0.247	5	0	0	0.117	2	0	0	0	0	0	0	0	0	0	0
hsa-miR-5004-3p	miRNA	0.198	4	0	0	0.411	7	0.16	3	0	0	0	0	0	0	0	0
hsa-miR-5004-5p	miRNA	0	0	0	0	0	0	0.053	1	0	0	0	0	0	0	0	0
hsa-miR-5006-3p	miRNA	0.049	1	0	0	0	0	0.053	1	0	0	0	0	0	0	0	0
hsa-miR-500a-3p	miRNA	0.889	18	1.021	19	0.821	14	0.747	14	0	0	0	0	0	0	0	0
hsa-miR-500a-5p	miRNA	1.729	35	1.182	22	1.408	24	4.909	92	0	0	0	0	0	0	0	0
hsa-miR-501-3p	miRNA	2.272	46	1.236	23	1.29	22	1.601	30	0	0	0	0	4.87	93	0	0
hsa-miR-501-5p	miRNA	2.124	43	1.289	24	0.645	11	0.961	18	0	0	0	0	0	0	0	0
hsa-miR-5010-3p	miRNA	1.581	32	0.752	14	1.408	24	0.32	6	0.778	15	1.5	32	4.817	92	0.044	1
hsa-miR-5010-5p	miRNA	0	0	0	0	0	0	0.053	1	0	0	0	0	0	0	0	0
hsa-miR-502-3p	miRNA	1.482	30	0.591	11	0.821	14	1.441	27	0	0	0	0	0	0	0	0
hsa-miR-503-3p	miRNA	3.458	70	2.525	47	2.933	50	1.227	23	0	0	5.814	124	11.834	226	0.353	8
hsa-miR-503-5p	miRNA	10.029	203	8.919	166	7.977	136	7.257	136	0	0	0	0	0	0	0	0
hsa-miR-505-3p	miRNA	11.412	231	12.465	232	9.209	157	22.465	421	0	0	0	0	1.728	33	0.044	1
hsa-miR-505-5p	miRNA	1.927	39	1.934	36	2.639	45	3.095	58	2.231	43	4.314	92	3.665	70	0	0
hsa-miR-508-3p	miRNA	0.049	1	0	0	0	0	0.267	5	0	0	0	0	0	0	0	0
hsa-miR-5088-3p	miRNA	0.148	3	0.161	3	0.117	2	0.16	3	0	0	0	0	0	0	0	0
hsa-miR-5088-5p	miRNA	0	0	0	0	0.117	2	0	0	0	0	0	0	0	0	0	0
hsa-miR-5090	miRNA	0	0	0	0	0.059	1	0	0	0	0	0	0	0	0	0	0
hsa-miR-5091	miRNA	0	0	0	0	0.059	1	0	0	0	0	0	0	0	0	0	0
hsa-miR-5094	miRNA	0.148	3	0.054	1	0.117	2	0	0	0	0	0	0	0	0	0	0
hsa-miR-511-5p	miRNA	0.049	1	0.054	1	0.059	1	0	0	0	0	0	0	0	0	0	0
hsa-miR-512-3p	miRNA	0.099	2	0.107	2	0.411	7	0.107	2	0	0	0	0	1.1	21	0	0
hsa-miR-514a-3p	miRNA	0	0	0.054	1	0.059	1	0	0	0	0	0	0	0	0	0	0
hsa-miR-514a-5p	miRNA	0.099	2	0	0	0.059	1	0	0	0	0	0	0	0	0	0	0
hsa-miR-514b-5p	miRNA	0	0	0	0	0	0	0.053	1	0	0	0	0	0	0	0	0
hsa-miR-515-3p	miRNA	0	0	0.054	1	0	0	0.107	2	0	0	0	0	0	0	0	0
hsa-miR-515-5p	miRNA	0	0	0.054	1	0.059	1	0	0	0	0	0	0	0	0	0	0
hsa-miR-516a-5p	miRNA	0	0	0.054	1	0	0	0	0	0	0	0	0	0	0	0	0
hsa-miR-517-5p	miRNA	0.099	2	0	0	0.117	2	0	0	0	0	0	0	0	0	0	0
hsa-miR-517a-3p	miRNA	0	0	0.107	2	0	0	0	0	0	0	0	0	0	0	0	0
hsa-miR-5187-5p	miRNA	0.148	3	0	0	0.235	4	0	0	0	0	0	0	0.367	7	0	0
hsa-miR-5188	miRNA	0	0	0.054	1	0.059	1	0	0	0	0	0	0	0	0	0	0
hsa-miR-5189-3p	miRNA	0.148	3	0.215	4	0.235	4	0.053	1	0	0	0	0	0	0	0	0
hsa-miR-5189-5p	miRNA	0	0	0	0	0.235	4	0	0	0	0	0	0	0	0	0	0
hsa-miR-518a-5p	miRNA	0	0	0.054	1	0	0	0	0	0	0	0	0	0	0	0	0
hsa-miR-518b	miRNA	0.099	2	0.269	5	0.117	2	0.053	1	0	0	0	0	0	0	0	0
hsa-miR-5193	miRNA	0.445	9	0.376	7	0.528	9	0.213	4	0	0	0	0	0	0	0	0
hsa-miR-520c-3p	miRNA	0	0	0.161	3	0.059	1	0	0	0	0	0	0	0	0	0	0
hsa-miR-520f-3p	miRNA	0	0	0	0	0.059	1	0	0	0	0	0	0	0	0	0	0
hsa-miR-520g-3p	miRNA	0.049	1	0	0	0	0	0	0	0	0	0	0	0	0	0	0
hsa-miR-520h	miRNA	0	0	0	0	0.059	1	0	0	0	0	0	0	0	0	0	0
hsa-miR-525-5p	miRNA	0.049	1	0	0	0	0	0	0	0	0	0	0	0	0	0	0
hsa-miR-532-3p	miRNA	2.766	56	2.579	48	1.701	29	9.872	185	0	0	0	0	0.314	6	0.044	1
hsa-miR-532-5p	miRNA	854.354	17294	734.507	13671	707.023	12054	721.503	13521	2.075	40	36.761	784	53.043	1013	0.441	10
hsa-miR-542-3p	miRNA	0.642	13	0.806	15	0.528	9	1.227	23	0	0	0	0	0	0	0	0
hsa-miR-542-5p	miRNA	405.687	8212	281.639	5242	247.757	4224	178.121	3338	0	0	6.049	129	6.493	124	0.132	3
hsa-miR-544b	miRNA	0.049	1	0.322	6	0	0	0.267	5	0	0	0	0	0	0	0	0
hsa-miR-545-3p	miRNA	0.296	6	0.269	5	0.411	7	0.267	5	0	0	0	0	0	0	0	0
hsa-miR-545-5p	miRNA	0.099	2	0.591	11	0.059	1	0	0	0	0	0	0	0	0	0	0
hsa-miR-548a-3p	miRNA	0.049	1	0.054	1	0.176	3	0	0	0	0	0	0	0	0	0	0
hsa-miR-548a-5p	miRNA	0.049	1	0.054	1	0	0	0	0	0	0	0	0	0	0	0	0
hsa-miR-548ab	miRNA	0.099	2	0.269	5	0.176	3	0.053	1	0	0	0	0	0	0	0	0
hsa-miR-548ad-5p	miRNA	0.148	3	0	0	0.293	5	0.374	7	0	0	0	0	0	0	0	0
hsa-miR-548ah-3p	miRNA	0	0	0.161	3	0.117	2	0	0	0	0	0	0	0	0	0	0
hsa-miR-548ai	miRNA	0.049	1	0	0	0	0	0	0	0	0	0	0	0	0	0	0
hsa-miR-548al	miRNA	0.049	1	0.161	3	0.117	2	0.267	5	0	0	0	0	0	0	0	0
hsa-miR-548am-5p	miRNA	0.049	1	0.86	16	0.528	9	1.174	22	0	0	0	0	0	0	0	0
hsa-miR-548ap-3p	miRNA	0	0	0.376	7	0.059	1	0.107	2	0	0	0	0	0	0	0	0
hsa-miR-548ap-5p	miRNA	0.049	1	0.054	1	0.117	2	0.427	8	0	0	0	0	0	0	0	0
hsa-miR-548aq-3p	miRNA	1.68	34	3.224	60	4.164	71	4.589	86	0	0	0	0	0	0	0	0
hsa-miR-548aq-5p	miRNA	0.148	3	0.161	3	0.059	1	0.267	5	0	0	0	0	0	0	0	0
hsa-miR-548ar-3p	miRNA	0.099	2	0.484	9	0.293	5	0.32	6	0	0	0	0	0	0	0	0
hsa-miR-548ar-5p	miRNA	0.593	12	0.537	10	0.293	5	1.067	20	0	0	0	0	0	0	0	0
hsa-miR-548at-5p	miRNA	0.543	11	0.269	5	0.235	4	0.32	6	0	0	1.032	22	0	0	0	0
hsa-miR-548au-3p	miRNA	0	0	0.054	1	0	0	0	0	0	0	0	0	0	0	0	0
hsa-miR-548au-5p	miRNA	0	0	0	0	0.059	1	0.213	4	0	0	0	0	0	0	0	0
hsa-miR-548av-3p	miRNA	0.79	16	0.645	12	0	0	0	0	0	0	0	0	0	0	0	0
hsa-miR-548aw	miRNA	0.198	4	0.215	4	0.235	4	0.213	4	0	0	0	0	0	0	0	0
hsa-miR-548ax	miRNA	0.148	3	0.215	4	0.176	3	0.267	5	0	0	0	0	0	0	0	0
hsa-miR-548ay-3p	miRNA	0	0	0	0	0	0	0.107	2	0	0	0	0	0	0	0	0
hsa-miR-548ay-5p	miRNA	2.174	44	3.062	57	2.698	46	4.002	75	0	0	0	0	0	0	0	0
hsa-miR-548az-5p	miRNA	0.049	1	0	0	0	0	0	0	0	0	0	0	0	0	0	0
hsa-miR-548b-3p	miRNA	3.162	64	3.062	57	2.053	35	1.441	27	0	0	0	0	0	0	0	0
hsa-miR-548b-5p	miRNA	0.692	14	1.934	36	0.645	11	1.227	23	0	0	0	0	0	0	0	0
hsa-miR-548bc	miRNA	0	0	0	0	0	0	0.053	1	0	0	0	0	0	0	0	0
hsa-miR-548c-5p	miRNA	0	0	0	0	0.117	2	0	0	0	0	0	0	0	0	0	0
hsa-miR-548d-3p	miRNA	0.198	4	0.43	8	0.059	1	0.213	4	0	0	0	0	0	0	0	0
hsa-miR-548d-5p	miRNA	4.841	98	11.605	216	5.279	90	6.724	126	0	0	0	0	0	0	0	0
hsa-miR-548e-3p	miRNA	0.346	7	0.107	2	0.528	9	0.107	2	0	0	0	0	0	0	0	0
hsa-miR-548e-5p	miRNA	0.198	4	0.054	1	0.469	8	0.053	1	0	0	0	0	0	0	0	0
hsa-miR-548g-5p	miRNA	0	0	0	0	0	0	0.16	3	0	0	0	0	0	0	0	0
hsa-miR-548i	miRNA	0	0	0.107	2	0	0	0.053	1	0	0	0	0	0	0	0	0
hsa-miR-548j-3p	miRNA	0.049	1	0.107	2	0	0	0.107	2	0	0	0	0	0	0	0	0
hsa-miR-548j-5p	miRNA	4.249	86	3.116	58	3.637	62	6.51	122	0	0	0	0	0	0	0	0
hsa-miR-548k	miRNA	41.992	850	41.961	781	41.058	700	39.968	749	0	0	1.969	42	0.733	14	0	0
hsa-miR-548l	miRNA	4.249	86	6.931	129	3.93	67	4.589	86	0.052	1	0	0	0	0	0	0
hsa-miR-548n	miRNA	0.049	1	0	0	0	0	0	0	0	0	0	0	0	0	0	0
hsa-miR-548o-3p	miRNA	0.148	3	0	0	0.997	17	1.281	24	0	0	1.313	28	0.524	10	0	0
hsa-miR-548o-5p	miRNA	0.939	19	0	0	0	0	0	0	0	0	0	0	0	0	0	0
hsa-miR-548q	miRNA	0.148	3	0.107	2	0.235	4	0.427	8	0	0	0	0	0	0	0	0
hsa-miR-548s	miRNA	0	0	0.107	2	0	0	0.213	4	0	0	0	0	0	0	0	0
hsa-miR-548t-5p	miRNA	0.148	3	0.484	9	0.059	1	0.213	4	0	0	1.641	35	0	0	0	0
hsa-miR-548u	miRNA	0.247	5	0.107	2	0.059	1	0.213	4	0	0	0	0	0	0	0	0
hsa-miR-548w	miRNA	0	0	0	0	0	0	0.107	2	0	0	0	0	0	0	0	0
hsa-miR-548x-5p	miRNA	0.099	2	0	0	0.059	1	0	0	0	0	0	0	0	0	0	0
hsa-miR-548z	miRNA	0	0	0	0	0.059	1	0	0	0	0	0	0	0	0	0	0
hsa-miR-550a-3-5p	miRNA	0	0	0.054	1	0.117	2	0.16	3	0	0	0	0	0	0	0	0
hsa-miR-550a-3p	miRNA	0.543	11	0	0	0.88	15	2.348	44	0	0	0	0	0	0	0	0
hsa-miR-550a-5p	miRNA	2.766	56	2.31	43	3.461	59	3.095	58	0	0	4.314	92	3.77	72	2.16	49
hsa-miR-550b-2-5p	miRNA	0	0	1.451	27	0	0	0.213	4	0	0	0	0	0	0	0	0
hsa-miR-550b-3p	miRNA	0	0	0.161	3	0	0	0.053	1	0	0	0	0	0	0	0	0
hsa-miR-551a	miRNA	0	0	0	0	0	0	0.107	2	0	0	0	0	0	0	0	0
hsa-miR-551b-3p	miRNA	1.482	30	0.645	12	0.704	12	1.174	22	0	0	0	0	0	0	0	0
hsa-miR-551b-5p	miRNA	2.421	49	0.806	15	1.642	28	0.16	3	0	0	0.563	12	3.299	63	0	0
hsa-miR-5581-3p	miRNA	3.804	77	3.17	59	2.17	37	2.988	56	0	0	3.235	69	1.937	37	0	0
hsa-miR-5582-3p	miRNA	1.531	31	1.504	28	1.056	18	1.494	28	0	0	0	0	1.257	24	0	0
hsa-miR-5582-5p	miRNA	0.099	2	0	0	0	0	0	0	0	0	0	0	0	0	0	0
hsa-miR-5584-3p	miRNA	0.395	8	0.484	9	0.469	8	0.267	5	0	0	0.75	16	0.262	5	0	0
hsa-miR-5584-5p	miRNA	0.148	3	0.161	3	0.293	5	0.32	6	0	0	1.782	38	0.105	2	0	0
hsa-miR-5585-3p	miRNA	0.049	1	0.054	1	0.235	4	0.053	1	0	0	0	0	0	0	0	0
hsa-miR-5586-5p	miRNA	0.099	2	0	0	0	0	0.107	2	0	0	0	0	0	0	0	0
hsa-miR-5587-3p	miRNA	0.049	1	0.054	1	0.059	1	0.16	3	0	0	0	0	0	0	0	0
hsa-miR-5587-5p	miRNA	0.049	1	0	0	0	0	0	0	0	0	0	0	0	0	0	0
hsa-miR-5588-3p	miRNA	0.049	1	0	0	0.059	1	0	0	0	0	0	0	0	0	0	0
hsa-miR-5588-5p	miRNA	0	0	0.107	2	0.117	2	0	0	0	0	0	0	0	0	0	0
hsa-miR-561-3p	miRNA	0.049	1	0.054	1	0	0	0	0	0	0	0	0	0	0	0	0
hsa-miR-561-5p	miRNA	0.494	10	0.161	3	0.176	3	0.32	6	0	0	0	0	0	0	0	0
hsa-miR-5681b	miRNA	0	0	0	0	0.059	1	0	0	0	0	0	0	0	0	0	0
hsa-miR-5685	miRNA	0.148	3	0	0	0	0	0	0	0	0	0	0	0	0	0	0
hsa-miR-5690	miRNA	0	0	0.161	3	0.176	3	0.053	1	2.801	54	0	0	1.047	20	0	0
hsa-miR-5696	miRNA	0	0	0.161	3	0.469	8	0.16	3	0	0	0	0	0	0	0	0
hsa-miR-5697	miRNA	0	0	0.161	3	0	0	0.16	3	0	0	0	0	0	0	0	0
hsa-miR-5699-3p	miRNA	0.494	10	0.698	13	0.528	9	1.174	22	0	0	0	0	0	0	0	0
hsa-miR-5699-5p	miRNA	0.049	1	0.054	1	0	0	0.107	2	0	0	0	0	0	0	0	0
hsa-miR-570-3p	miRNA	1.531	31	1.075	20	1.936	33	2.935	55	0	0	0	0	0	0	0	0
hsa-miR-5703	miRNA	0	0	0.054	1	0	0	0	0	0	0	0	0	0	0	0	0
hsa-miR-5706	miRNA	0.049	1	0	0	0.117	2	0	0	0	0	0	0	0	0	0	0
hsa-miR-572	miRNA	0	0	0.054	1	0.059	1	0.053	1	0	0	0.047	1	0	0	0	0
hsa-miR-573	miRNA	0.741	15	0.913	17	0.235	4	0.213	4	0	0	0	0	0	0	0	0
hsa-miR-574-3p	miRNA	2.223	45	1.827	34	1.29	22	3.789	71	0.207	4	0.844	18	0.943	18	0.705	16
hsa-miR-574-5p	miRNA	0.296	6	0.161	3	0	0	0.16	3	0.207	4	0	0	0.524	10	0	0
hsa-miR-576-3p	miRNA	0.148	3	0.269	5	0.235	4	0.16	3	0	0	0	0	0	0	0	0
hsa-miR-576-5p	miRNA	55.33	1120	43.895	817	36.014	614	56.19	1053	28.998	559	63.629	1357	55.452	1059	3.835	87
hsa-miR-577	miRNA	0	0	0.269	5	0.059	1	0.053	1	0	0	0	0	0	0	0	0
hsa-miR-579-3p	miRNA	1.531	31	2.364	44	1.232	21	1.974	37	0	0	0	0	0	0	0	0
hsa-miR-579-5p	miRNA	3.755	76	3.009	56	2.346	40	4.322	81	0	0	0.516	11	0	0	0	0
hsa-miR-580-3p	miRNA	0	0	0.054	1	0.059	1	0.053	1	0	0	0	0	0	0	0	0
hsa-miR-582-5p	miRNA	2.075	42	1.397	26	1.114	19	0.32	6	0	0	0	0	0	0	0	0
hsa-miR-584-3p	miRNA	0	0	0	0	0	0	0.053	1	0	0	0	0	0	0	0	0
hsa-miR-584-5p	miRNA	0.939	19	2.525	47	1.232	21	2.508	47	0	0	1.969	42	0.524	10	0.044	1
hsa-miR-586	miRNA	0.148	3	0.054	1	0.704	12	0.213	4	0	0	0	0	0	0	0	0
hsa-miR-588	miRNA	0.198	4	0.269	5	0.176	3	0.107	2	0	0	0	0	0	0	0	0
hsa-miR-589-3p	miRNA	1.136	23	1.397	26	0.821	14	0.587	11	1.712	33	0	0	0.262	5	0	0
hsa-miR-589-5p	miRNA	15.315	310	13.969	260	12.904	220	11.099	208	0	0	2.626	56	0.157	3	0.044	1
hsa-miR-590-3p	miRNA	359.052	7268	342.19	6369	231.627	3949	326.787	6124	1.401	27	4.079	87	0.628	12	0.044	1
hsa-miR-590-5p	miRNA	1.63	33	2.633	49	3.578	61	2.401	45	0	0	0	0	0	0	0	0
hsa-miR-592	miRNA	0.049	1	0.107	2	0	0	0	0	0	0	0	0	0	0	0	0
hsa-miR-597-3p	miRNA	0.445	9	0.376	7	0.352	6	0.374	7	0	0	0	0	0	0	0	0
hsa-miR-597-5p	miRNA	0	0	0	0	0	0	0.32	6	0	0	0	0	0	0	0	0
hsa-miR-599	miRNA	0.099	2	0	0	0	0	0	0	0	0	0	0	0	0	0	0
hsa-miR-600	miRNA	0.049	1	0	0	0	0	0	0	0	0	0	0	0	0	0	0
hsa-miR-602	miRNA	0.049	1	0.215	4	0	0	0	0	0	0	0	0	0	0	0	0
hsa-miR-603	miRNA	0	0	0	0	0.059	1	0	0	0	0	0	0	0	0	0	0
hsa-miR-615-3p	miRNA	0.099	2	0	0	0.235	4	0.107	2	0	0	0	0	0	0	0	0
hsa-miR-615-5p	miRNA	0	0	0	0	0.117	2	0	0	0	0	0	0	0	0	0	0
hsa-miR-619-5p	miRNA	0.296	6	0.107	2	0.587	10	0.427	8	0	0	0	0	0.628	12	0	0
hsa-miR-624-3p	miRNA	0.049	1	0.107	2	0.059	1	0.213	4	0	0	0	0	0	0	0	0
hsa-miR-624-5p	miRNA	13.684	277	16.602	309	10.616	181	10.245	192	0	0	0	0	1.519	29	0	0
hsa-miR-625-3p	miRNA	1.433	29	1.612	30	1.173	20	2.134	40	0	0	0.656	14	0.524	10	1.146	26
hsa-miR-625-5p	miRNA	17.587	356	19.181	357	17.89	305	25.507	478	17.222	332	59.315	1265	75.873	1449	5.819	132
hsa-miR-627-3p	miRNA	0	0	0.161	3	0.059	1	0.107	2	0	0	0	0	0	0	0	0
hsa-miR-627-5p	miRNA	0.148	3	0.107	2	0.293	5	0.053	1	0	0	0	0	0	0	0	0
hsa-miR-628-3p	miRNA	14.771	299	15.42	287	11.203	191	6.884	129	0	0	4.736	101	2.828	54	0	0
hsa-miR-628-5p	miRNA	13.19	267	9.886	184	12.024	205	5.763	108	1.037	20	8.956	191	6.598	126	0.749	17
hsa-miR-629-3p	miRNA	3.112	63	4.406	82	5.044	86	7.898	148	0	0	0.047	1	2.775	53	0	0
hsa-miR-629-5p	miRNA	0.741	15	1.128	21	1.114	19	4.109	77	2.127	41	1.922	41	5.027	96	0	0
hsa-miR-636	miRNA	1.334	27	1.075	20	1.349	23	0.587	11	0	0	0	0	0	0	0.044	1
hsa-miR-641	miRNA	3.063	62	3.868	72	2.053	35	5.39	101	0	0	0	0	0	0	0	0
hsa-miR-642a-5p	miRNA	0	0	0	0	0	0	0.053	1	0	0	0	0	0	0	0	0
hsa-miR-643	miRNA	0	0	0.269	5	0.235	4	0	0	0	0	0	0	0	0	0	0
hsa-miR-6500-3p	miRNA	29.345	594	21.598	402	20.94	357	7.204	135	2.749	53	4.22	90	7.226	138	0	0
hsa-miR-6500-5p	miRNA	0	0	0.054	1	0	0	0.053	1	0	0	0	0	0	0	0	0
hsa-miR-6501-3p	miRNA	0.198	4	0.322	6	0	0	0.107	2	0	0	0	0	0	0	0	0
hsa-miR-6501-5p	miRNA	0.099	2	0.054	1	0.176	3	0.534	10	0	0	0	0	0	0	0	0
hsa-miR-6502-5p	miRNA	1.63	33	2.042	38	0.88	15	1.708	32	0	0	0	0	0	0	0	0
hsa-miR-6508-3p	miRNA	0.346	7	0.107	2	0.059	1	0.053	1	0	0	0	0	0	0	0	0
hsa-miR-6508-5p	miRNA	0	0	0	0	0.059	1	0	0	0	0	0	0	0	0	0	0
hsa-miR-6509-3p	miRNA	0.099	2	0.054	1	0.059	1	0	0	0	0	0	0	0	0	0	0
hsa-miR-6509-5p	miRNA	0	0	0.054	1	0	0	0.053	1	0	0	0	0	0	0	0	0
hsa-miR-651-5p	miRNA	104.633	2118	92.089	1714	63.347	1080	49.039	919	0	0	0.281	6	0.052	1	0	0
hsa-miR-6511a-3p	miRNA	0.642	13	0.107	2	1.232	21	0.534	10	3.32	64	0.75	16	2.88	55	0.044	1
hsa-miR-6511b-3p	miRNA	0.445	9	0.967	18	0.645	11	1.067	20	1.712	33	2.063	44	7.488	143	0.044	1
hsa-miR-6511b-5p	miRNA	0	0	0.054	1	0	0	0	0	0	0	0	0	0	0	0	0
hsa-miR-6513-3p	miRNA	0.247	5	0.269	5	0.176	3	0.267	5	0	0	0	0	0	0	0	0
hsa-miR-6513-5p	miRNA	1.087	22	0.322	6	0.587	10	0.534	10	0	0	0	0	0	0	0	0
hsa-miR-6514-3p	miRNA	0.445	9	0.215	4	0.411	7	0.374	7	0	0	1.219	26	0.052	1	0	0
hsa-miR-6514-5p	miRNA	0.198	4	0	0	0	0	0.107	2	0	0	0	0	0.995	19	0	0
hsa-miR-6515-3p	miRNA	0.543	11	0.269	5	0.117	2	0.213	4	0	0	0.422	9	0	0	0	0
hsa-miR-6515-5p	miRNA	0	0	0.322	6	0	0	0.16	3	0	0	0	0	0	0	0	0
hsa-miR-6516-3p	miRNA	0.148	3	0	0	0.059	1	0	0	0	0	0	0	0	0	0	0
hsa-miR-6516-5p	miRNA	0.247	5	0.537	10	0.821	14	0.374	7	0	0	0	0	0	0	0	0
hsa-miR-652-3p	miRNA	902.422	18267	757.503	14099	802.865	13688	660.457	12377	91.404	1762	254.14	5420	356.483	6808	27.023	613
hsa-miR-652-5p	miRNA	8.596	174	15.957	297	9.502	162	10.085	189	0	0	0	0	0	0	0	0
hsa-miR-659-3p	miRNA	0.049	1	0.054	1	0.059	1	0.053	1	0	0	0	0	0	0	0	0
hsa-miR-659-5p	miRNA	0.198	4	0.107	2	0.352	6	0.107	2	0	0	0	0	0	0	0	0
hsa-miR-660-3p	miRNA	0.099	2	0.107	2	0	0	0	0	0	0	0	0	0	0	0	0
hsa-miR-660-5p	miRNA	35.964	728	38.791	722	40.941	698	49.039	919	1.712	33	0.047	1	0.367	7	0	0
hsa-miR-663b	miRNA	0	0	0.107	2	0.059	1	0	0	0	0	0.047	1	0.681	13	0	0
hsa-miR-664a-3p	miRNA	16.352	331	21.437	399	20.764	354	25.454	477	8.871	171	22.788	486	17.489	334	0.132	3
hsa-miR-664b-3p	miRNA	2.174	44	1.719	32	1.818	31	2.828	53	0	0	0.047	1	2.932	56	0	0
hsa-miR-671-3p	miRNA	8.596	174	13.593	253	6.921	118	6.937	130	0.882	17	6.283	134	1.99	38	0	0
hsa-miR-671-5p	miRNA	35.47	718	53.835	1002	54.373	927	66.115	1239	0	0	16.693	356	6.441	123	2.425	55
hsa-miR-6721-5p	miRNA	0	0	0.054	1	0	0	0.053	1	0	0	0	0	0	0	0	0
hsa-miR-6724-5p	miRNA	0.84	17	0.43	8	0.704	12	0.427	8	0	0	0	0	2.409	46	0	0
hsa-miR-6727-5p	miRNA	0	0	0	0	0.117	2	0	0	0	0	0	0	0	0	0	0
hsa-miR-6728-3p	miRNA	0	0	0	0	0	0	0	0	0	0	0	0	0.262	5	0	0
hsa-miR-6728-5p	miRNA	0	0	0.161	3	0	0	0.107	2	0	0	0	0	0	0	0	0
hsa-miR-6731-3p	miRNA	0.049	1	0.322	6	0.059	1	0.107	2	1.141	22	0.422	9	0	0	0	0
hsa-miR-6732-3p	miRNA	0.148	3	0	0	0	0	0.213	4	0	0	1.172	25	0.471	9	0	0
hsa-miR-6732-5p	miRNA	0.049	1	0	0	0.117	2	0	0	0	0	0	0	0	0	0	0
hsa-miR-6733-3p	miRNA	0.049	1	0.107	2	0.059	1	0	0	0	0	0	0	0.367	7	0	0
hsa-miR-6733-5p	miRNA	0.049	1	0.107	2	0	0	0	0	0	0	0	0	0	0	0	0
hsa-miR-6734-3p	miRNA	0	0	0.054	1	0.059	1	0.107	2	0	0	0	0	0	0	0.926	21
hsa-miR-6734-5p	miRNA	0.049	1	0	0	0	0	0.053	1	0	0	0	0	0.367	7	0	0
hsa-miR-6735-3p	miRNA	0.049	1	0	0	0	0	0	0	0	0	0	0	0	0	0	0
hsa-miR-6736-3p	miRNA	0.049	1	0	0	0.059	1	0	0	0	0	0	0	0	0	0	0
hsa-miR-6736-5p	miRNA	0.198	4	0.054	1	0.059	1	0	0	0	0	0	0	1.1	21	0	0
hsa-miR-6738-3p	miRNA	0.099	2	0.107	2	0.117	2	0	0	0	0	0	0	0	0	0	0
hsa-miR-6739-3p	miRNA	0.049	1	0.215	4	0.059	1	0.053	1	0	0	0	0	0.052	1	0	0
hsa-miR-6740-3p	miRNA	0.099	2	0	0	0	0	0	0	0	0	0	0	0	0	0	0
hsa-miR-6741-3p	miRNA	0.247	5	0.054	1	0.235	4	0.213	4	1.764	34	0	0	0	0	0.044	1
hsa-miR-6741-5p	miRNA	0	0	0.215	4	0	0	0.16	3	0	0	0	0	0	0	0	0
hsa-miR-6742-3p	miRNA	0.099	2	0	0	0	0	0	0	0	0	0	0	0	0	0	0
hsa-miR-6742-5p	miRNA	0	0	0	0	0	0	0.107	2	0	0	0	0	0	0	0	0
hsa-miR-6743-3p	miRNA	0	0	0	0	0	0	0.053	1	0	0	0	0	0.733	14	0	0
hsa-miR-6746-3p	miRNA	0	0	0	0	0	0	0.053	1	0	0	0	0	0	0	0	0
hsa-miR-6747-3p	miRNA	0.84	17	0.376	7	0.763	13	0.48	9	0	0	0	0	1.99	38	0	0
hsa-miR-6748-3p	miRNA	0.494	10	0.269	5	0.117	2	0.267	5	0	0	0	0	1.414	27	0	0
hsa-miR-6749-3p	miRNA	0.296	6	0.269	5	0.352	6	0.374	7	1.349	26	2.063	44	3.037	58	0	0
hsa-miR-675-3p	miRNA	0	0	0	0	0.059	1	0.053	1	0	0	0	0	0	0	0	0
hsa-miR-675-5p	miRNA	0.049	1	0	0	0	0	0	0	0	0	0	0	0	0	0	0
hsa-miR-6750-3p	miRNA	0	0	0	0	0.117	2	0.107	2	0	0	0	0	0	0	0	0
hsa-miR-6750-5p	miRNA	0	0	0	0	0	0	0.107	2	0	0	0	0	0	0	0	0
hsa-miR-6751-3p	miRNA	0	0	0	0	0	0	0	0	0	0	0	0	0.681	13	0	0
hsa-miR-6751-5p	miRNA	0	0	0.054	1	0.117	2	0.16	3	0	0	0	0	0	0	0	0
hsa-miR-6752-3p	miRNA	0	0	0	0	0	0	0	0	0	0	0	0	0.314	6	0	0
hsa-miR-6753-3p	miRNA	0.099	2	0	0	0	0	0.053	1	0	0	0	0	0	0	0	0
hsa-miR-6754-3p	miRNA	0	0	0	0	0	0	0.053	1	0	0	0	0	0	0	0	0
hsa-miR-6754-5p	miRNA	0.099	2	0	0	0	0	0	0	0	0	0	0	0	0	0	0
hsa-miR-6755-3p	miRNA	0.395	8	0.161	3	0.117	2	0	0	0	0	0	0	0	0	0	0
hsa-miR-6755-5p	miRNA	0.198	4	0.054	1	0.352	6	0.053	1	0	0	0	0	0.838	16	0	0
hsa-miR-6758-5p	miRNA	0	0	0	0	0	0	0	0	0	0	0	0	0.943	18	0	0
hsa-miR-6759-3p	miRNA	0	0	0.054	1	0	0	0	0	0	0	0	0	0	0	0	0
hsa-miR-6763-3p	miRNA	0	0	0	0	0.059	1	0.053	1	0	0	0	0	0	0	0	0
hsa-miR-6763-5p	miRNA	0.049	1	0	0	0.059	1	0.107	2	0	0	0	0	0	0	0	0
hsa-miR-6764-3p	miRNA	1.284	26	0.484	9	0.704	12	0.427	8	0	0	0	0	0	0	0	0
hsa-miR-6764-5p	miRNA	1.284	26	1.021	19	0.411	7	0.747	14	0	0	1.125	24	0	0	0	0
hsa-miR-6766-3p	miRNA	0.494	10	1.075	20	0.469	8	0	0	0	0	0.375	8	2.723	52	0	0
hsa-miR-6766-5p	miRNA	0.049	1	0	0	0	0	0	0	0	0	0	0	0	0	0	0
hsa-miR-6767-5p	miRNA	0.247	5	0	0	0	0	0.16	3	0	0	0	0	0.943	18	0	0
hsa-miR-6768-5p	miRNA	0	0	0	0	0	0	0.16	3	0	0	0	0	0	0	0	0
hsa-miR-6769a-5p	miRNA	0	0	0.054	1	0.117	2	0	0	0	0	0	0	0	0	0	0
hsa-miR-6769b-3p	miRNA	0	0	0	0	0.117	2	0	0	0	0	0	0	0	0	0	0
hsa-miR-6770-3p	miRNA	0.296	6	0.269	5	0.059	1	0.267	5	0	0	0	0	0	0	0	0
hsa-miR-6770-5p	miRNA	0.247	5	0.054	1	0.117	2	0.427	8	0	0	0	0	0	0	0	0
hsa-miR-6771-3p	miRNA	0.148	3	0.054	1	0.117	2	0.107	2	0	0	0	0	0	0	0	0
hsa-miR-6771-5p	miRNA	0	0	0.054	1	0.176	3	0	0	0	0	0	0	0	0	0	0
hsa-miR-6772-3p	miRNA	0	0	0	0	0	0	0.053	1	0	0	0	0	0	0	0	0
hsa-miR-6775-3p	miRNA	0	0	0.054	1	0	0	0.053	1	0.052	1	0	0	0	0	0.044	1
hsa-miR-6776-3p	miRNA	0	0	0	0	0	0	0	0	0	0	0	0	0.052	1	0	0
hsa-miR-6777-3p	miRNA	0.741	15	0.322	6	0.235	4	1.067	20	0.052	1	0	0	0.995	19	0	0
hsa-miR-6777-5p	miRNA	0	0	0.269	5	0.059	1	0.053	1	0	0	0	0	0	0	0	0
hsa-miR-6778-3p	miRNA	0	0	0	0	0	0	0.053	1	0	0	0	0	0	0	0	0
hsa-miR-6780b-3p	miRNA	0.692	14	0.054	1	0.235	4	0	0	1.556	30	0	0	1.78	34	0	0
hsa-miR-6781-3p	miRNA	0	0	0.161	3	0	0	0	0	0	0	0	0	0	0	0	0
hsa-miR-6782-3p	miRNA	0.099	2	0.215	4	0	0	0.107	2	0	0	0	0	0	0	0	0
hsa-miR-6783-3p	miRNA	0.049	1	0.107	2	0.117	2	0.053	1	0	0	0	0	0	0	0	0
hsa-miR-6783-5p	miRNA	0.445	9	0.484	9	0.587	10	0.267	5	0	0	0	0	0	0	0	0
hsa-miR-6785-5p	miRNA	0	0	0	0	0.059	1	0	0	0	0	0	0	0	0	0	0
hsa-miR-6789-3p	miRNA	0.049	1	0.107	2	0.117	2	0.16	3	0	0	0.703	15	1.571	30	0	0
hsa-miR-6789-5p	miRNA	0	0	0.054	1	0	0	0.107	2	0	0	0	0	0	0	0	0
hsa-miR-6791-3p	miRNA	0.148	3	0	0	0.059	1	0.374	7	0	0	0	0	0	0	0	0
hsa-miR-6793-3p	miRNA	0	0	0	0	0	0	0	0	0	0	0	0	0.052	1	0.044	1
hsa-miR-6796-5p	miRNA	0	0	0.054	1	0	0	0	0	0	0	0	0	0	0	0	0
hsa-miR-6797-3p	miRNA	0.642	13	0.161	3	0.117	2	0.267	5	0	0	0.985	21	0	0	0	0
hsa-miR-6797-5p	miRNA	0	0	0	0	0	0	0.107	2	0	0	0	0	0	0	0	0
hsa-miR-6798-3p	miRNA	0.148	3	0	0	0	0	0.053	1	0	0	0	0	0	0	0	0
hsa-miR-6799-3p	miRNA	0.099	2	0.161	3	0.176	3	0.374	7	0	0	0	0	1.623	31	0.044	1
hsa-miR-6800-3p	miRNA	0.049	1	0	0	0	0	0.107	2	0	0	0	0	0	0	0	0
hsa-miR-6801-3p	miRNA	0	0	0	0	0.117	2	0	0	0	0	0	0	0	0	0	0
hsa-miR-6801-5p	miRNA	0.148	3	0	0	0	0	0.053	1	3.839	74	0	0	0	0	0	0
hsa-miR-6802-3p	miRNA	0.395	8	0.107	2	0.293	5	0.213	4	0	0	0	0	0.209	4	0	0
hsa-miR-6802-5p	miRNA	0.148	3	0	0	0.293	5	0.16	3	0	0	0	0	0.471	9	0	0
hsa-miR-6803-3p	miRNA	1.531	31	0.591	11	0.821	14	1.441	27	0.934	18	1.735	37	9.006	172	0.088	2
hsa-miR-6804-3p	miRNA	0	0	0	0	0.059	1	0.053	1	0	0	0	0	0	0	0	0
hsa-miR-6804-5p	miRNA	0.494	10	0.537	10	0.763	13	0.694	13	0	0	1.547	33	2.723	52	0.97	22
hsa-miR-6805-3p	miRNA	0	0	0.054	1	0.059	1	0	0	0	0	0	0	0.052	1	0	0
hsa-miR-6805-5p	miRNA	0	0	0	0	0.059	1	0.107	2	0	0	0	0	0.576	11	0	0
hsa-miR-6806-3p	miRNA	0	0	0	0	0	0	0.16	3	0	0	0	0	0	0	0	0
hsa-miR-6807-3p	miRNA	0.445	9	0.269	5	0.235	4	0.267	5	0	0	0	0	0	0	0	0
hsa-miR-6807-5p	miRNA	0.099	2	0.215	4	0.059	1	0.053	1	0	0	0.047	1	0.052	1	0	0
hsa-miR-6808-3p	miRNA	0.395	8	0.698	13	0.704	12	0.587	11	0	0	0	0	0.89	17	0	0
hsa-miR-6810-3p	miRNA	0.099	2	0	0	0.117	2	0	0	0	0	0	0	0	0	0	0
hsa-miR-6810-5p	miRNA	0	0	0	0	0	0	0	0	0	0	0	0	1.152	22	0	0
hsa-miR-6812-3p	miRNA	0.79	16	0.376	7	0.235	4	0	0	0	0	0.75	16	1.833	35	0.044	1
hsa-miR-6813-3p	miRNA	0	0	0	0	0.059	1	0.213	4	0	0	0	0	1.833	35	0	0
hsa-miR-6813-5p	miRNA	0	0	0.054	1	0	0	0.267	5	0	0	0	0	0	0	0	0
hsa-miR-6817-3p	miRNA	0.049	1	0.269	5	0.059	1	0	0	0	0	0	0	0.052	1	0	0
hsa-miR-6817-5p	miRNA	0	0	0	0	0	0	0.107	2	0	0	0	0	0	0	0	0
hsa-miR-6818-3p	miRNA	0.099	2	0.107	2	0	0	0	0	0	0	0	0	0	0	0	0
hsa-miR-6818-5p	miRNA	0.346	7	0.322	6	0	0	0.267	5	0	0	0	0	0	0	0	0
hsa-miR-6819-3p	miRNA	0.099	2	0.107	2	0.704	12	0.107	2	0	0	0	0	0.576	11	0	0
hsa-miR-6820-3p	miRNA	0.543	11	0.376	7	0.059	1	0.374	7	0	0	1.172	25	2.932	56	0	0
hsa-miR-6820-5p	miRNA	0.049	1	0	0	0.059	1	0.053	1	0	0	0	0	0	0	0.661	15
hsa-miR-6823-3p	miRNA	0	0	0	0	0.059	1	0	0	0	0	0	0	0	0	0	0
hsa-miR-6823-5p	miRNA	0	0	0	0	0	0	0.053	1	0	0	0	0	0	0	0	0
hsa-miR-6824-3p	miRNA	1.68	34	0.645	12	1.466	25	0.8	15	1.816	35	0	0	0	0	0	0
hsa-miR-6825-5p	miRNA	0	0	0	0	0.059	1	0	0	0	0	0	0	0	0	0	0
hsa-miR-6826-3p	miRNA	0.049	1	0.054	1	0.059	1	0.267	5	0	0	0	0	0.576	11	0	0
hsa-miR-6829-3p	miRNA	0.247	5	0.269	5	0.88	15	0.587	11	0	0	0	0	0	0	0	0
hsa-miR-6829-5p	miRNA	0	0	0.054	1	0	0	0	0	0	0	0	0	0	0	0	0
hsa-miR-6832-3p	miRNA	0.049	1	0.054	1	0	0	0	0	0	0	0	0	0	0	0	0
hsa-miR-6832-5p	miRNA	0.296	6	0.054	1	0	0	0	0	0	0	0	0	0	0	0	0
hsa-miR-6833-3p	miRNA	0	0	0	0	0.059	1	0.267	5	0	0	0	0	0.105	2	0.044	1
hsa-miR-6834-3p	miRNA	0	0	0	0	0.059	1	0.053	1	0	0	0	0	0	0	0	0
hsa-miR-6836-3p	miRNA	0	0	0	0	0.059	1	0	0	0	0	0	0	0	0	0	0
hsa-miR-6837-3p	miRNA	0	0	0	0	0.059	1	0	0	0	0	0	0	0	0	0	0
hsa-miR-6837-5p	miRNA	0.099	2	0	0	0	0	0	0	0	0	0	0	0	0	0	0
hsa-miR-6838-3p	miRNA	0	0	0.054	1	0.176	3	0.107	2	0	0	0	0	0	0	0	0
hsa-miR-6838-5p	miRNA	0	0	0.054	1	0.059	1	0.107	2	0	0	0	0	0	0	0	0
hsa-miR-6842-3p	miRNA	29.641	600	30.786	573	23.345	398	31.483	590	1.919	37	4.173	89	2.304	44	0.573	13
hsa-miR-6842-5p	miRNA	1.531	31	0.645	12	0.528	9	1.281	24	0.104	2	0.188	4	1.466	28	0.617	14
hsa-miR-6844	miRNA	0.148	3	0.054	1	0	0	0	0	0	0	0	0	0	0	0	0
hsa-miR-6847-3p	miRNA	0.049	1	0.161	3	0	0	0.107	2	0	0	0	0	0	0	0	0
hsa-miR-6847-5p	miRNA	0.049	1	0.107	2	0.059	1	0	0	0	0	0	0	0.052	1	0	0
hsa-miR-6848-3p	miRNA	0.988	20	0.591	11	0.469	8	0.694	13	0	0	0	0	0	0	0	0
hsa-miR-6848-5p	miRNA	0	0	0	0	0	0	0	0	0	0	0	0	0.471	9	0	0
hsa-miR-6849-3p	miRNA	0.099	2	0	0	0.293	5	0.107	2	0	0	0.797	17	0	0	0	0
hsa-miR-6851-3p	miRNA	0.148	3	0.107	2	0.059	1	0	0	0	0	0	0	0	0	0	0
hsa-miR-6852-3p	miRNA	0.198	4	0.054	1	0.176	3	0	0	0	0	0	0	0.733	14	0	0
hsa-miR-6852-5p	miRNA	0.247	5	0.054	1	0.117	2	0.107	2	0	0	0	0	0	0	0	0
hsa-miR-6855-3p	miRNA	0	0	0	0	0	0	0.107	2	0	0	0	0	0	0	0	0
hsa-miR-6855-5p	miRNA	0.049	1	0.161	3	0.117	2	0	0	0	0	1.969	42	0.785	15	0	0
hsa-miR-6856-3p	miRNA	0.198	4	0	0	0	0	0.053	1	0	0	0	0	0	0	0	0
hsa-miR-6856-5p	miRNA	0	0	0.054	1	0	0	0	0	0	0	0	0	0	0	0	0
hsa-miR-6857-5p	miRNA	0.049	1	0	0	0.059	1	0.107	2	0	0	0	0	0	0	0	0
hsa-miR-6858-3p	miRNA	0	0	0	0	0	0	0.053	1	0	0	0	0	0	0	0	0
hsa-miR-6859-5p	miRNA	0	0	0.054	1	0	0	0	0	0	0	0	0	0	0	0	0
hsa-miR-6861-3p	miRNA	0	0	0.054	1	0	0	0.213	4	0	0	0	0	0	0	0	0
hsa-miR-6864-5p	miRNA	0.049	1	0	0	0	0	0	0	0	0	0	0	0	0	0	0
hsa-miR-6866-3p	miRNA	0	0	0	0	0	0	0	0	0	0	0	0	0.052	1	0	0
hsa-miR-6866-5p	miRNA	0	0	0.107	2	0.059	1	0	0	0	0	0	0	0	0	0	0
hsa-miR-6869-5p	miRNA	0	0	0.215	4	0	0	0.053	1	0	0	0	0	0	0	0	0
hsa-miR-6870-3p	miRNA	0	0	0.054	1	0	0	0.053	1	0	0	0.656	14	0	0	0	0
hsa-miR-6871-3p	miRNA	0.198	4	0.054	1	0.293	5	0.107	2	0	0	0	0	0.576	11	0	0
hsa-miR-6871-5p	miRNA	0.247	5	0.054	1	0.293	5	0	0	0	0	3.751	80	0	0	0	0
hsa-miR-6873-3p	miRNA	0.099	2	0.322	6	0.059	1	0.053	1	0	0	0	0	0	0	0	0
hsa-miR-6874-5p	miRNA	0.049	1	0	0	0	0	0	0	0	0	0	0	0	0	0	0
hsa-miR-6876-3p	miRNA	0	0	0	0	0.059	1	0	0	0	0	0	0	0	0	0	0
hsa-miR-6876-5p	miRNA	0.099	2	0	0	0	0	0.213	4	0	0	0	0	0.314	6	0	0
hsa-miR-6877-3p	miRNA	0	0	0.054	1	0	0	0	0	0	0	0	0	0	0	0	0
hsa-miR-6877-5p	miRNA	0.148	3	0.107	2	0	0	0.053	1	0	0	2.391	51	0	0	0	0
hsa-miR-6878-3p	miRNA	0	0	0.107	2	0	0	0	0	0	0	0	0	0	0	0	0
hsa-miR-6879-3p	miRNA	0	0	0.107	2	0.117	2	0.213	4	0	0	0.094	2	0	0	0	0
hsa-miR-6882-3p	miRNA	0.198	4	0.107	2	0.059	1	0	0	0	0	0.656	14	0	0	0	0
hsa-miR-6882-5p	miRNA	0.247	5	0.107	2	0.059	1	0.16	3	0	0	0	0	0	0	0	0
hsa-miR-6883-3p	miRNA	0	0	0	0	0	0	0	0	0	0	0.141	3	0	0	0	0
hsa-miR-6884-3p	miRNA	0	0	0.054	1	0	0	0.053	1	0	0	0	0	0	0	0	0
hsa-miR-6884-5p	miRNA	0	0	0	0	0.059	1	0.16	3	0	0	0	0	0	0	0	0
hsa-miR-6885-3p	miRNA	0.79	16	0.913	17	0.469	8	0.107	2	0	0	0	0	1.571	30	0	0
hsa-miR-6886-3p	miRNA	0.099	2	0.054	1	0.059	1	0.053	1	0	0	0	0	0	0	0	0
hsa-miR-6886-5p	miRNA	0.099	2	0.107	2	0.117	2	0.053	1	0	0	0	0	0	0	0	0
hsa-miR-6889-3p	miRNA	0	0	0.054	1	0	0	0	0	0	0	0	0	0.628	12	0	0
hsa-miR-6890-3p	miRNA	0	0	0	0	0	0	0.107	2	0	0	0	0	0	0	0	0
hsa-miR-6894-3p	miRNA	0.198	4	0.107	2	0	0	0	0	0	0	0	0	0.89	17	0	0
hsa-miR-6895-3p	miRNA	0.445	9	0.161	3	0.352	6	0.107	2	0	0	0	0	0	0	0	0
hsa-miR-6895-5p	miRNA	0	0	0	0	0	0	0	0	2.179	42	0	0	0	0	0	0
hsa-miR-7-1-3p	miRNA	87.293	1767	161.988	3015	100.123	1707	108.271	2029	0	0	13.551	289	9.006	172	1.631	37
hsa-miR-7-2-3p	miRNA	0	0	0	0	0.059	1	0.213	4	0	0	0	0	0	0	0	0
hsa-miR-7-5p	miRNA	2751.73	55701	4071.68	75784	66.632	1136	2209.71	41410	18.467	356	451.31	9625	4.137	79	22.791	517
hsa-miR-708-5p	miRNA	0	0	0.107	2	0	0	0	0	0	0	0	0	0	0	0	0
hsa-miR-7108-3p	miRNA	0	0	0	0	0.059	1	0	0	0	0	0	0	0	0	0	0
hsa-miR-7108-5p	miRNA	0.099	2	0.161	3	0	0	0	0	0	0	0	0	0	0	0	0
hsa-miR-7109-3p	miRNA	0	0	0	0	0	0	0.053	1	0	0	0	0	0	0	0	0
hsa-miR-7110-3p	miRNA	0.049	1	0.107	2	0.117	2	0.107	2	0	0	0	0	0.419	8	0	0
hsa-miR-7111-3p	miRNA	0.049	1	0	0	0	0	0.213	4	0	0	0.469	10	0.262	5	0	0
hsa-miR-7112-3p	miRNA	0.395	8	0.645	12	0.176	3	0.32	6	0	0	0	0	0.733	14	0	0
hsa-miR-7113-3p	miRNA	0.049	1	0	0	0	0	0	0	0	0	0	0	0	0	0	0
hsa-miR-7113-5p	miRNA	0.79	16	0.161	3	0.352	6	0.107	2	0	0	0	0	1.99	38	0	0
hsa-miR-7114-5p	miRNA	0.049	1	0.107	2	0.117	2	0.16	3	0	0	0	0	0	0	0	0
hsa-miR-7151-3p	miRNA	0	0	0	0	0.059	1	0	0	0	0	0	0	0	0	0	0
hsa-miR-744-3p	miRNA	2.272	46	1.88	35	1.994	34	2.721	51	0	0	0	0	1.571	30	0	0
hsa-miR-744-5p	miRNA	22.675	459	21.598	402	20.529	350	5.87	110	35.794	690	22.554	481	11.258	215	0	0
hsa-miR-760	miRNA	1.136	23	0.376	7	0.763	13	0.64	12	2.697	52	0.047	1	1.571	30	0	0
hsa-miR-766-3p	miRNA	48.513	982	46.582	867	61.646	1051	51.868	972	48.088	927	101	2154	150.751	2879	8.376	190
hsa-miR-766-5p	miRNA	2.223	45	2.633	49	2.346	40	1.174	22	3.787	73	4.83	103	3.875	74	0	0
hsa-miR-769-3p	miRNA	139.906	2832	97.676	1818	102.704	1751	78.228	1466	4.306	83	18.052	385	30.161	576	0.044	1
hsa-miR-769-5p	miRNA	77.067	1560	66.783	1243	60.004	1023	54.162	1015	4.461	86	2.204	47	0.733	14	0	0
hsa-miR-7703	miRNA	0.049	1	0	0	0	0	0	0	0	0	0	0	0	0	0	0
hsa-miR-7704	miRNA	0.198	4	0.269	5	0.411	7	0.32	6	0	0	3.798	81	1.257	24	0.353	8
hsa-miR-7705	miRNA	25.294	512	25.628	477	22.523	384	40.341	756	0	0	0.047	1	1.571	30	0	0
hsa-miR-7706	miRNA	0.445	9	0.322	6	0.528	9	0.427	8	0	0	0	0	0	0	0	0
hsa-miR-7849-3p	miRNA	0.148	3	0	0	0.059	1	0	0	0	0	0	0	0	0	0	0
hsa-miR-7850-5p	miRNA	0	0	0	0	0	0	0.053	1	0	0	0	0	0	0	0	0
hsa-miR-7974	miRNA	4.743	96	5.964	111	4.81	82	1.067	20	0	0	0	0	2.409	46	0	0
hsa-miR-7975	miRNA	0.049	1	0	0	0.059	1	0.107	2	0	0	0	0	0.052	1	0	0
hsa-miR-7976	miRNA	0.939	19	0.591	11	0.763	13	1.281	24	0	0	1.125	24	1.728	33	0	0
hsa-miR-7977	miRNA	0.346	7	0.43	8	0.117	2	0.8	15	0.467	9	1.219	26	2.566	49	1.411	32
hsa-miR-8485	miRNA	0	0	0	0	0.059	1	0	0	0	0	0	0	0	0	0	0
hsa-miR-873-3p	miRNA	0.198	4	0.054	1	0.117	2	0.16	3	0	0	0	0	0	0	0	0
hsa-miR-873-5p	miRNA	0.198	4	0.269	5	0.235	4	0.053	1	0	0	0	0	0	0	0	0
hsa-miR-874-3p	miRNA	0.593	12	0.752	14	0.235	4	0.64	12	0	0	1.594	34	0	0	0	0
hsa-miR-874-5p	miRNA	0	0	0	0	0.117	2	0	0	0	0	0	0	0	0	0	0
hsa-miR-875-3p	miRNA	0.049	1	0	0	0.117	2	0	0	0	0	0	0	0	0	0	0
hsa-miR-875-5p	miRNA	0	0	0	0	0	0	0.053	1	0	0	0	0	0	0	0	0
hsa-miR-876-3p	miRNA	2.421	49	2.74	51	2.698	46	2.348	44	0	0	0	0	0	0	0	0
hsa-miR-876-5p	miRNA	0	0	0.054	1	0.117	2	0.16	3	0	0	0	0	0	0	0	0
hsa-miR-877-3p	miRNA	0.889	18	1.021	19	0.763	13	0.961	18	5.966	115	2.813	60	4.922	94	0	0
hsa-miR-877-5p	miRNA	18.723	379	16.602	309	16.189	276	21.772	408	16.392	316	24.992	533	27.804	531	0	0
hsa-miR-885-5p	miRNA	0	0	0	0	0	0	0.053	1	0	0	0	0	0	0	0	0
hsa-miR-9-3p	miRNA	1.284	26	1.289	24	1.114	19	0.587	11	0	0	0	0	0	0	0	0
hsa-miR-9-5p	miRNA	8.151	165	7.414	138	6.745	115	4.429	83	0	0	1.313	28	0	0	0	0
hsa-miR-92a-1-5p	miRNA	25.294	512	20.309	378	22.582	385	19.21	360	18.001	347	68.083	1452	98.598	1883	12.123	275
hsa-miR-92a-3p	miRNA	31353.8	634669	33860.8	630233	33174.7	565593	36198	678353	20715.5	399336	31832.2	678880	39051.3	745790	4764.75	108086
hsa-miR-92b-3p	miRNA	18.575	376	15.044	280	17.596	300	27.268	511	45.961	886	30.572	652	57.965	1107	20.939	475
hsa-miR-93-3p	miRNA	5.632	114	4.406	82	5.807	99	3.469	65	0	0	0.047	1	0.785	15	0.088	2
hsa-miR-93-5p	miRNA	2811.75	56916	2394.09	44560	1853.96	31608	2053.25	38478	54.676	1054	265.909	5671	247.15	4720	24.157	548
hsa-miR-933	miRNA	0	0	0	0	0.117	2	0.107	2	0	0	0	0	0	0	0	0
hsa-miR-935	miRNA	0	0	0	0	0.059	1	0	0	0.052	1	0	0	0	0	0	0
hsa-miR-937-3p	miRNA	0.939	19	0.591	11	0.352	6	0.32	6	0	0	0.938	20	2.618	50	0	0
hsa-miR-937-5p	miRNA	0	0	0.054	1	0.059	1	0	0	0	0	0	0	0	0	0	0
hsa-miR-939-3p	miRNA	0.247	5	0	0	0.059	1	0	0	0	0	0	0	0	0	0	0
hsa-miR-939-5p	miRNA	0.148	3	0.054	1	0.117	2	0.16	3	0	0	0	0	0	0	0	0
hsa-miR-940	miRNA	2.865	58	2.418	45	3.05	52	2.028	38	0	0	0	0	1.309	25	0	0
hsa-miR-941	miRNA	189.11	3828	210.611	3920	149.98	2557	236.232	4427	4.15	80	19.272	411	13.981	267	1.631	37
hsa-miR-942-3p	miRNA	2.816	57	4.191	78	1.994	34	4.429	83	0	0	0	0	2.252	43	0	0
hsa-miR-942-5p	miRNA	12.153	246	14.668	273	11.027	188	12.753	239	3.683	71	13.176	281	10.734	205	0.705	16
hsa-miR-943	miRNA	0.198	4	0.376	7	0.293	5	0.16	3	0	0	0	0	0	0	0	0
hsa-miR-944	miRNA	0	0	0	0	0.059	1	0.053	1	0	0	0	0	0	0	0	0
hsa-miR-95-3p	miRNA	0.889	18	0.591	11	0.587	10	0.267	5	0	0	0	0	0	0	0	0
hsa-miR-95-5p	miRNA	0	0	0.054	1	0	0	0	0	0	0	0	0	0	0	0	0
hsa-miR-96-5p	miRNA	0.296	6	0.322	6	0.293	5	0.374	7	0	0	0	0	0.838	16	0	0
hsa-miR-98-3p	miRNA	0	0	0	0	0.235	4	0.16	3	0	0	0	0	0	0	0	0
hsa-miR-98-5p	miRNA	3011.73	60964	3604.95	67097	2985.34	50897	3280.09	61469	648.695	12505	1993.73	42520	2079.26	39709	32.665	741
hsa-miR-9901	miRNA	0.099	2	0	0	0	0	0.107	2	0	0	0	0	0	0	0	0
hsa-miR-9903	miRNA	0.049	1	0.269	5	0.352	6	0	0	0	0	0	0	0	0	0	0
hsa-miR-9985	miRNA	0.247	5	0.215	4	0	0	0.053	1	0	0	0	0	0	0	0	0
hsa-miR-99a-3p	miRNA	1.433	29	1.612	30	1.76	30	1.601	30	0	0	0	0	0	0	0	0
hsa-miR-99a-5p	miRNA	10525.3	213055	8322.27	154898	7413.24	126388	8316.1	155844	114.747	2212	429.319	9156	568.498	10857	17.986	408
hsa-miR-99b-3p	miRNA	13.684	277	14.077	262	13.256	226	23.212	435	0	0	4.689	100	1.885	36	0	0
hsa-miR-99b-5p	miRNA	320.864	6495	453.459	8440	434.103	7401	586.125	10984	183.793	3543	386.696	8247	794.442	15172	54.002	1225
novel-hsa-miR100-3p	miRNA	0	0	0	0	0.117	2	0	0	0	0	0	0	0	0	0	0
novel-hsa-miR100-5p	miRNA	0.099	2	0.107	2	0.059	1	0.107	2	1.452	28	1.219	26	0.052	1	1.763	40
novel-hsa-miR102-3p	miRNA	2.766	56	3.17	59	1.584	27	1.814	34	0	0	0	0	0.367	7	0	0
novel-hsa-miR103-3p	miRNA	0	0	0	0	0.117	2	0	0	0	0	0	0	0	0	0	0
novel-hsa-miR103-5p	miRNA	0	0	0	0	0	0	0.16	3	0	0	0	0	0	0	0	0
novel-hsa-miR104-5p	miRNA	0	0	0	0	0	0	0	0	0	0	1.782	38	0	0	0	0
novel-hsa-miR105-5p	miRNA	0.445	9	0.269	5	0.352	6	0.64	12	0	0	0	0	0.419	8	0	0
novel-hsa-miR107-3p	miRNA	0.099	2	0.054	1	0.117	2	0.107	2	0	0	0	0	0	0	0	0
novel-hsa-miR108-5p	miRNA	1.037	21	0.645	12	0.938	16	0.053	1	0	0	0	0	0.367	7	0	0
novel-hsa-miR11-3p	miRNA	0.395	8	0.376	7	0.352	6	0.32	6	0	0	1.172	25	0	0	0	0
novel-hsa-miR110-3p	miRNA	0	0	0.054	1	0.176	3	0	0	1.608	31	2.298	49	0.052	1	0	0
novel-hsa-miR111-3p	miRNA	0.494	10	0.215	4	0.88	15	0	0	0	0	1.922	41	0	0	0	0
novel-hsa-miR112-3p	miRNA	0.099	2	0.269	5	0	0	0.107	2	0	0	0	0	0	0	0	0
novel-hsa-miR114-3p	miRNA	0	0	0	0	0	0	0.053	1	0	0	0	0	0	0	0	0
novel-hsa-miR115-3p	miRNA	0.741	15	0.806	15	0.821	14	0.32	6	2.334	45	1.5	32	0.943	18	3.174	72
novel-hsa-miR115-5p	miRNA	0.692	14	1.666	31	1.525	26	1.921	36	3.268	63	1.454	31	7.854	150	1.19	27
novel-hsa-miR116-5p	miRNA	2.569	52	1.075	20	5.924	101	1.387	26	0	0	2.673	57	2.618	50	0	0
novel-hsa-miR117-3p	miRNA	0.049	1	0	0	0	0	0.053	1	0	0	0	0	0	0	0	0
novel-hsa-miR118-3p	miRNA	0.148	3	0.054	1	0	0	0.534	10	0	0	0	0	0	0	0	0
novel-hsa-miR119-3p	miRNA	0.049	1	0.054	1	0	0	0.16	3	0	0	0	0	0.105	2	0	0
novel-hsa-miR120-5p	miRNA	0.099	2	0.107	2	0.176	3	0.107	2	0	0	0	0	0	0	0	0
novel-hsa-miR121-5p	miRNA	4.15	84	4.674	87	3.226	55	2.935	55	5.239	101	8.675	185	11.677	223	2.425	55
novel-hsa-miR122-3p	miRNA	0.198	4	0	0	0.059	1	0	0	0	0	0	0	0.052	1	0	0
novel-hsa-miR123-3p	miRNA	0.148	3	0.645	12	0.528	9	0.213	4	0	0	0	0	0	0	0	0
novel-hsa-miR123-5p	miRNA	0.099	2	0	0	0	0	0	0	0	0	0	0	0	0	0	0
novel-hsa-miR124-5p	miRNA	0	0	0	0	0.059	1	0.107	2	0	0	0	0	0	0	0	0
novel-hsa-miR125-3p	miRNA	0.148	3	0.161	3	0.176	3	0.213	4	0	0	0	0	0.995	19	0.044	1
novel-hsa-miR125-5p	miRNA	0	0	0.107	2	0.059	1	0.053	1	0	0	0	0	0	0	0	0
novel-hsa-miR126-3p	miRNA	0.049	1	0.107	2	0.235	4	0.267	5	0	0	0	0	0	0	0	0
novel-hsa-miR127-3p	miRNA	0.049	1	0.054	1	0.176	3	0	0	0	0	0	0	0	0	0	0
novel-hsa-miR129-5p	miRNA	0	0	0	0	0.059	1	0	0	0	0	0	0	0	0	0	0
novel-hsa-miR130-3p	miRNA	1.284	26	0.752	14	0.645	11	0.961	18	0	0	0	0	0	0	0	0
novel-hsa-miR131-3p	miRNA	0.346	7	0.967	18	1.114	19	1.441	27	0.052	1	0.141	3	1.047	20	0	0
novel-hsa-miR133-3p	miRNA	2.371	48	2.203	41	1.29	22	1.974	37	0.052	1	0.047	1	0	0	0	0
novel-hsa-miR133-5p	miRNA	0	0	0.054	1	0	0	0	0	0	0	0	0	0	0	0	0
novel-hsa-miR134-3p	miRNA	0	0	0	0	0.059	1	0	0	0	0	0	0	0	0	0	0
novel-hsa-miR134-5p	miRNA	0.395	8	0.269	5	0.117	2	0.32	6	0	0	1.407	30	0	0	0	0
novel-hsa-miR135-5p	miRNA	0	0	0	0	0.059	1	0	0	0	0	0	0	0	0	0	0
novel-hsa-miR138-3p	miRNA	0.099	2	0	0	0.059	1	0	0	0	0	0	0	0.052	1	0.044	1
novel-hsa-miR138-5p	miRNA	0.148	3	0	0	0.235	4	0.213	4	0	0	0	0	0.052	1	0.044	1
novel-hsa-miR14-5p	miRNA	0.049	1	0	0	0.059	1	0	0	0.156	3	0.234	5	0.105	2	1.146	26
novel-hsa-miR140-5p	miRNA	0.049	1	0	0	0	0	0.053	1	0	0	0	0	0	0	0	0
novel-hsa-miR143-3p	miRNA	0	0	0	0	0.235	4	0.053	1	0	0	0	0	0	0	0	0
novel-hsa-miR143-5p	miRNA	0	0	0	0	0	0	0.053	1	0	0	0	0	0	0	0	0
novel-hsa-miR145-3p	miRNA	0	0	0	0	0.059	1	0.053	1	0	0	0.844	18	0.471	9	0	0
novel-hsa-miR146-3p	miRNA	0.049	1	0.215	4	0.117	2	0	0	0	0	0.61	13	0	0	5.202	118
novel-hsa-miR147-3p	miRNA	0	0	0	0	0	0	0.107	2	0	0	0	0	0	0	0	0
novel-hsa-miR148-3p	miRNA	0	0	0.054	1	0.411	7	0.16	3	1.867	36	1.454	31	0.262	5	0	0
novel-hsa-miR149-5p	miRNA	4.446	90	4.083	76	2.639	45	3.522	66	0	0	1.782	38	3.142	60	0.617	14
novel-hsa-miR15-3p	miRNA	0	0	0.054	1	0	0	0	0	0	0	0	0	0	0	0	0
novel-hsa-miR151-3p	miRNA	0.049	1	0.054	1	0.117	2	0	0	0	0	1.266	27	0	0	0	0
novel-hsa-miR151-5p	miRNA	0.296	6	0.484	9	0.352	6	0.534	10	0	0	2.626	56	0.471	9	0	0
novel-hsa-miR153-5p	miRNA	0.247	5	0	0	0	0	0	0	0	0	0	0	0	0	0	0
novel-hsa-miR154-5p	miRNA	0	0	0	0	0.176	3	0.16	3	0	0	0	0	0	0	0	0
novel-hsa-miR157-5p	miRNA	0	0	0.054	1	0.059	1	0.107	2	0	0	0	0	0	0	0	0
novel-hsa-miR158-3p	miRNA	0.346	7	0.376	7	0.645	11	0.587	11	0	0	0	0	0	0	0	0
novel-hsa-miR159-3p	miRNA	0.148	3	0.161	3	0	0	0.053	1	0	0	0	0	0	0	0	0
novel-hsa-miR159-5p	miRNA	0.198	4	0.215	4	0.352	6	0.16	3	0	0	0	0	0	0	0	0
novel-hsa-miR16-3p	miRNA	0.741	15	0.215	4	0.411	7	0.16	3	0	0	0.469	10	0.733	14	0	0
novel-hsa-miR160-3p	miRNA	0.099	2	0.215	4	0.469	8	0.32	6	0	0	0	0	0	0	0	0
novel-hsa-miR160-5p	miRNA	0.049	1	0.269	5	0.176	3	0.267	5	0	0	0	0	0	0	0	0
novel-hsa-miR161-5p	miRNA	0.247	5	0.806	15	0.293	5	0.107	2	0	0	0	0	0	0	0	0
novel-hsa-miR164-3p	miRNA	0.494	10	0.161	3	0.117	2	0.053	1	0	0	0	0	0.052	1	0	0
novel-hsa-miR165-5p	miRNA	0	0	0	0	0.059	1	0.267	5	0	0	0	0	0	0	0	0
novel-hsa-miR166-3p	miRNA	0	0	0	0	0	0	0.053	1	0	0	0	0	0	0	0	0
novel-hsa-miR167-3p	miRNA	0.148	3	0	0	0.117	2	0.053	1	0	0	0	0	0	0	0	0
novel-hsa-miR168-3p	miRNA	0.099	2	0.161	3	0	0	0.053	1	0	0	0	0	0	0	0	0
novel-hsa-miR168-5p	miRNA	0	0	0	0	0	0	0.053	1	0	0	0	0	0	0	0	0
novel-hsa-miR169-3p	miRNA	0	0	0.107	2	0	0	0.053	1	0	0	0	0	0	0	0	0
novel-hsa-miR17-3p	miRNA	0.148	3	0	0	0	0	0	0	0	0	0	0	0	0	0	0
novel-hsa-miR17-5p	miRNA	0	0	0.054	1	0	0	0	0	0	0	0	0	0	0	0	0
novel-hsa-miR170-3p	miRNA	0.148	3	0	0	0	0	0.107	2	0	0	0	0	0	0	0	0
novel-hsa-miR171-5p	miRNA	0.049	1	0.054	1	0.059	1	0.374	7	0	0	0	0	0	0	0	0
novel-hsa-miR172-5p	miRNA	0	0	0	0	0.293	5	0.053	1	0	0	0.985	21	0	0	0	0
novel-hsa-miR175-3p	miRNA	0.099	2	0	0	0	0	0	0	0	0	0	0	1.047	20	0	0
novel-hsa-miR178-5p	miRNA	1.284	26	1.128	21	1.173	20	0.747	14	0	0	1.125	24	0	0	0	0
novel-hsa-miR179-3p	miRNA	0	0	0	0	0	0	0.053	1	0	0	0	0	0	0	0	0
novel-hsa-miR18-3p	miRNA	0.445	9	0.537	10	0.293	5	0.747	14	0	0	0	0	0	0	0	0
novel-hsa-miR180-3p	miRNA	0.099	2	0	0	0.059	1	0	0	0	0	0	0	0	0	0	0
novel-hsa-miR181-3p	miRNA	0.099	2	0	0	0	0	0	0	0	0	0	0	0	0	0.749	17
novel-hsa-miR182-5p	miRNA	0.198	4	0.054	1	0.176	3	0.107	2	0	0	0	0	0	0	0	0
novel-hsa-miR183-3p	miRNA	0.049	1	0.107	2	0	0	0.053	1	0	0	0	0	0	0	0	0
novel-hsa-miR183-5p	miRNA	0.247	5	0	0	0	0	0.16	3	0	0	0	0	0	0	0	0
novel-hsa-miR187-5p	miRNA	0	0	0.054	1	0	0	0.107	2	0	0	0	0	0	0	0	0
novel-hsa-miR188-5p	miRNA	0.79	16	3.062	57	1.76	30	3.949	74	15.303	295	5.627	120	7.435	142	24.378	553
novel-hsa-miR189-5p	miRNA	10.029	203	12.518	233	15.837	270	13.607	255	587.483	11325	218.129	4652	318.52	6083	367.431	8335
novel-hsa-miR191-3p	miRNA	1.136	23	0.967	18	1.29	22	1.227	23	0	0	0	0	0	0	0	0
novel-hsa-miR191-5p	miRNA	0.099	2	0	0	0	0	0.107	2	0	0	0	0	0	0	0	0
novel-hsa-miR192-3p	miRNA	0.049	1	0	0	0.352	6	0.213	4	0	0	0	0	0	0	0	0
novel-hsa-miR192-5p	miRNA	0.198	4	0.215	4	0.528	9	0.213	4	0	0	0	0	0	0	0	0
novel-hsa-miR193-3p	miRNA	0	0	0.107	2	0	0	0	0	0	0	0	0	0	0	0	0
novel-hsa-miR193-5p	miRNA	0.593	12	0.537	10	0.645	11	0.64	12	0	0	6.846	146	4.765	91	2.425	55
novel-hsa-miR194-3p	miRNA	0	0	0.054	1	0	0	0	0	0	0	0	0	0	0	0	0
novel-hsa-miR195-3p	miRNA	0.099	2	0.215	4	0.176	3	0.534	10	0	0	0.047	1	0	0	0	0
novel-hsa-miR198-5p	miRNA	1.037	21	0.322	6	0.235	4	0.48	9	2.438	47	0	0	0	0	0	0
novel-hsa-miR199-5p	miRNA	17.538	355	35.782	666	34.958	596	27.321	512	17.378	335	33.198	708	61.578	1176	21.424	486
novel-hsa-miR20-3p	miRNA	0.049	1	0	0	0	0	0	0	0	0	0.047	1	0	0	0	0
novel-hsa-miR20-5p	miRNA	0.247	5	0	0	0.059	1	0	0	0	0	2.485	53	0.89	17	0	0
novel-hsa-miR200-3p	miRNA	0.049	1	0	0	0	0	0.213	4	0	0	0	0	0	0	0	0
novel-hsa-miR200-5p	miRNA	3.557	72	3.922	73	1.936	33	7.204	135	0	0	0	0	0	0	0	0
novel-hsa-miR201-3p	miRNA	0.099	2	0.054	1	0	0	0	0	0	0	0	0	0	0	0	0
novel-hsa-miR203-3p	miRNA	0.148	3	0.752	14	0.645	11	0.32	6	0	0	0	0	0	0	0	0
novel-hsa-miR204-5p	miRNA	0.939	19	1.343	25	0.88	15	1.654	31	0	0	1.125	24	0	0	0	0
novel-hsa-miR205-3p	miRNA	0.099	2	0.376	7	0.059	1	0	0	0	0	0	0	0	0	0	0
novel-hsa-miR205-5p	miRNA	0	0	0.054	1	0	0	0	0	0	0	0	0	0	0	0	0
novel-hsa-miR206-3p	miRNA	1.037	21	1.397	26	0.997	17	1.441	27	0	0	0	0	0.838	16	0	0
novel-hsa-miR207-5p	miRNA	0.148	3	0	0	0	0	0	0	0	0	0	0	0	0	0	0
novel-hsa-miR208-3p	miRNA	2.371	48	2.579	48	2.053	35	0.534	10	0	0	5.252	112	2.094	40	0	0
novel-hsa-miR208-5p	miRNA	0.148	3	0.322	6	0	0	0.427	8	0	0	0	0	0	0	0	0
novel-hsa-miR209-3p	miRNA	0	0	0.161	3	0.587	10	0	0	0	0	0.375	8	0	0	0	0
novel-hsa-miR210-3p	miRNA	0.198	4	0.107	2	0	0	0	0	0	0	0.422	9	1.309	25	0	0
novel-hsa-miR211-3p	miRNA	0.247	5	0.161	3	0	0	0.16	3	0	0	0	0	0.576	11	0	0
novel-hsa-miR212-5p	miRNA	0.049	1	0	0	0	0	0	0	0	0	0	0	0.576	11	0	0
novel-hsa-miR214-5p	miRNA	0.198	4	0.537	10	0.352	6	0.32	6	0	0	0.141	3	0.367	7	0.044	1
novel-hsa-miR217-3p	miRNA	0.099	2	0.054	1	0	0	0	0	0	0	0	0	0	0	0	0
novel-hsa-miR217-5p	miRNA	0.099	2	0	0	0.059	1	0	0	0	0	0	0	0	0	0	0
novel-hsa-miR218-3p	miRNA	0.099	2	0.054	1	0	0	0.16	3	0	0	0	0	0	0	0	0
novel-hsa-miR219-3p	miRNA	0.198	4	0.269	5	0.059	1	0.32	6	0	0	0	0	0	0	0	0
novel-hsa-miR219-5p	miRNA	0	0	0.054	1	0.117	2	0	0	0	0	0	0	0	0	0	0
novel-hsa-miR220-3p	miRNA	0	0	0	0	0.059	1	0	0	0	0	0	0	0	0	0	0
novel-hsa-miR222-5p	miRNA	0.049	1	0	0	0	0	0	0	0	0	0	0	0	0	0	0
novel-hsa-miR223-3p	miRNA	0	0	0.054	1	0	0	0.053	1	0	0	0	0	0	0	0	0
novel-hsa-miR223-5p	miRNA	0.939	19	0.967	18	0.293	5	0.587	11	0	0	0	0	0	0	0	0
novel-hsa-miR224-3p	miRNA	0.642	13	0.86	16	0.352	6	0.961	18	0	0	0	0	0	0	0	0
novel-hsa-miR225-3p	miRNA	0	0	0	0	0	0	0.107	2	0	0	0	0	0	0	0	0
novel-hsa-miR226-5p	miRNA	0.148	3	0.322	6	0.059	1	0.213	4	0	0	0	0	0	0	0	0
novel-hsa-miR227-5p	miRNA	0	0	0	0	0.117	2	0	0	0	0	0	0	0	0	0	0
novel-hsa-miR228-3p	miRNA	0	0	0	0	0	0	0	0	0	0	0	0	0.576	11	0	0
novel-hsa-miR229-3p	miRNA	0	0	0	0	0	0	0	0	0	0	0	0	0.262	5	0	0
novel-hsa-miR230-3p	miRNA	1.037	21	0.537	10	0.528	9	0.427	8	0	0	0	0	1.1	21	0	0
novel-hsa-miR230-5p	miRNA	0.099	2	0.054	1	0.176	3	0	0	0	0	0	0	0	0	0	0
novel-hsa-miR233-3p	miRNA	0.099	2	0	0	0	0	0	0	0	0	0	0	0	0	0	0
novel-hsa-miR234-3p	miRNA	0.099	2	0.161	3	0.117	2	0.374	7	0	0	0	0	0	0	0	0
novel-hsa-miR235-3p	miRNA	0	0	0	0	0.117	2	0	0	0	0	0	0	0	0	0.044	1
novel-hsa-miR236-3p	miRNA	0.395	8	0.484	9	0.411	7	0.213	4	0	0	0	0	0	0	0	0
novel-hsa-miR236-5p	miRNA	0.445	9	0.215	4	0.293	5	0.107	2	0	0	0	0	0	0	0	0
novel-hsa-miR237-3p	miRNA	0.741	15	0.698	13	0.938	16	1.441	27	0	0	5.111	109	0.052	1	0	0
novel-hsa-miR239-5p	miRNA	0.049	1	0.161	3	0.117	2	0	0	3.372	65	0.188	4	0.209	4	0	0
novel-hsa-miR240-5p	miRNA	0.148	3	0	0	0	0	0.107	2	0	0	0	0	0	0	0	0
novel-hsa-miR241-3p	miRNA	0.445	9	0.107	2	0.117	2	0.053	1	0	0	0	0	0	0	0	0
novel-hsa-miR241-5p	miRNA	0.148	3	0.054	1	0	0	0.107	2	0	0	0	0	0	0	0	0
novel-hsa-miR242-5p	miRNA	0.099	2	0.054	1	0.059	1	0.107	2	0	0	0	0	1.414	27	0	0
novel-hsa-miR243-5p	miRNA	0.049	1	0	0	0.059	1	0	0	1.712	33	0	0	0	0	0	0
novel-hsa-miR245-5p	miRNA	0.642	13	0.967	18	0.704	12	0.694	13	0	0	0.094	2	0.524	10	1.499	34
novel-hsa-miR246-5p	miRNA	0.247	5	0	0	0.117	2	0	0	0	0	0	0	0	0	0	0
novel-hsa-miR247-5p	miRNA	0	0	0.161	3	0	0	0	0	0	0	2.673	57	0	0	0.044	1
novel-hsa-miR248-3p	miRNA	0	0	0.054	1	0	0	0	0	0	0	0	0	0	0	0	0
novel-hsa-miR249-3p	miRNA	0	0	0	0	0	0	0	0	0	0	0	0	0.681	13	0	0
novel-hsa-miR249-5p	miRNA	0.049	1	0	0	0	0	0	0	0	0	0	0	0	0	0	0
novel-hsa-miR25-3p	miRNA	0	0	0	0	0	0	0.213	4	0	0	0	0	0	0	0	0
novel-hsa-miR250-3p	miRNA	0.099	2	0.161	3	0.059	1	0	0	0	0	0	0	0	0	0	0
novel-hsa-miR251-3p	miRNA	0.049	1	0	0	0	0	0	0	0	0	0	0	0	0	0	0
novel-hsa-miR253-3p	miRNA	0.099	2	0	0	0.117	2	0	0	0	0	0	0	0.681	13	0	0
novel-hsa-miR255-5p	miRNA	0.049	1	0	0	0.117	2	0	0	3.994	77	0.61	13	0.367	7	0.132	3
novel-hsa-miR256-3p	miRNA	0	0	0.054	1	0	0	0.053	1	0	0	0	0	0	0	0	0
novel-hsa-miR257-3p	miRNA	0	0	0	0	0	0	0.053	1	0	0	0	0	0	0	0	0
novel-hsa-miR257-5p	miRNA	0.049	1	0	0	0	0	0	0	0	0	0	0	0	0	0	0
novel-hsa-miR26-3p	miRNA	0	0	0.054	1	0	0	0	0	0	0	2.766	59	0	0	0	0
novel-hsa-miR26-5p	miRNA	0.099	2	0.107	2	0.176	3	0.267	5	0	0	0	0	0	0	0.044	1
novel-hsa-miR260-5p	miRNA	0.642	13	0.806	15	1.525	26	0.534	10	2.749	53	16.271	347	5.707	109	10.977	249
novel-hsa-miR261-5p	miRNA	16.451	333	21.975	409	13.842	236	27.695	519	0	0	0	0	0	0	0	0
novel-hsa-miR262-5p	miRNA	0.099	2	0	0	0	0	0	0	0	0	0	0	0	0	0	0
novel-hsa-miR263-3p	miRNA	0.049	1	0	0	0	0	0.053	1	0	0	0	0	0	0	0	0
novel-hsa-miR264-3p	miRNA	122.072	2471	148.61	2766	161.887	2760	136.392	2556	787.979	15190	461.11	9834	546.82	10443	445.546	10107
novel-hsa-miR265-3p	miRNA	0.148	3	0	0	0	0	0.053	1	0	0	0	0	0	0	0	0
novel-hsa-miR266-3p	miRNA	0.494	10	0.107	2	0.059	1	0.213	4	0	0	0	0	0	0	0	0
novel-hsa-miR266-5p	miRNA	0.741	15	0.591	11	0.235	4	0.16	3	0	0	0	0	0.262	5	0	0
novel-hsa-miR267-3p	miRNA	0.049	1	0.161	3	0	0	0.053	1	0	0	0	0	0	0	0	0
novel-hsa-miR27-5p	miRNA	2.223	45	1.021	19	1.408	24	1.174	22	0	0	1.219	26	0.524	10	0	0
novel-hsa-miR270-5p	miRNA	0.049	1	0	0	0	0	0.107	2	0	0	0	0	0	0	0	0
novel-hsa-miR273-3p	miRNA	0	0	0	0	0.059	1	0	0	0	0	0	0	0	0	0	0
novel-hsa-miR274-3p	miRNA	0	0	0	0	0	0	0	0	0.052	1	0.656	14	3.456	66	0	0
novel-hsa-miR275-3p	miRNA	0.099	2	0.376	7	0.469	8	0.854	16	0	0	0	0	0	0	0	0
novel-hsa-miR276-3p	miRNA	0.049	1	0	0	0	0	0.107	2	0	0	0	0	0	0	0	0
novel-hsa-miR277-3p	miRNA	0.84	17	0.967	18	0.469	8	0.32	6	0	0	0.797	17	0	0	0	0
novel-hsa-miR278-3p	miRNA	0.494	10	1.021	19	0.293	5	0.747	14	0	0	0	0	0	0	0	0
novel-hsa-miR278-5p	miRNA	0.148	3	0	0	0.117	2	0	0	0	0	0	0	0	0	0	0
novel-hsa-miR281-3p	miRNA	0.198	4	0.107	2	0.176	3	0.587	11	0	0	0	0	0	0	0	0
novel-hsa-miR282-3p	miRNA	0	0	0	0	0.059	1	0	0	0	0	0	0	0	0	0	0
novel-hsa-miR283-5p	miRNA	0	0	0	0	0	0	0	0	0.052	1	0.047	1	0	0	0.264	6
novel-hsa-miR284-3p	miRNA	0.79	16	0.43	8	0.821	14	0.267	5	1.608	31	0	0	1.571	30	0.529	12
novel-hsa-miR285-5p	miRNA	11.214	227	21.061	392	20.705	353	44.931	842	101.052	1948	159.517	3402	94.2	1799	145.694	3305
novel-hsa-miR286-3p	miRNA	0.247	5	0.376	7	0.704	12	0.16	3	6.277	121	7.221	154	2.094	40	0.353	8
novel-hsa-miR287-5p	miRNA	0.049	1	0	0	0.117	2	0	0	0	0	0	0	0	0	0	0
novel-hsa-miR289-3p	miRNA	0	0	0	0	0	0	0	0	0	0	0.047	1	0	0	0	0
novel-hsa-miR289-5p	miRNA	2.124	43	4.406	82	4.751	81	9.071	170	3.891	75	6.658	142	2.618	50	0	0
novel-hsa-miR29-3p	miRNA	0.494	10	0.484	9	0.704	12	1.014	19	0	0	0	0	0	0	0	0
novel-hsa-miR290-3p	miRNA	0	0	0	0	0	0	0.053	1	0	0	0	0	0	0	0	0
novel-hsa-miR290-5p	miRNA	0	0	0	0	0.059	1	0.053	1	0	0	0	0	0	0	0	0
novel-hsa-miR292-3p	miRNA	0	0	0.054	1	0	0	0.053	1	0	0	0	0	0	0	0	0
novel-hsa-miR293-5p	miRNA	0	0	0	0	0	0	0	0	0	0	0.422	9	2.199	42	0	0
novel-hsa-miR294-3p	miRNA	0	0	0.107	2	0	0	0	0	0	0	0	0	0	0	0	0
novel-hsa-miR296-3p	miRNA	0.049	1	0	0	0	0	0.053	1	0	0	0	0	0	0	0	0
novel-hsa-miR298-3p	miRNA	0.049	1	0	0	0	0	0	0	0	0	0	0	0	0	0	0
novel-hsa-miR299-5p	miRNA	0	0	0.376	7	0.059	1	0.053	1	0.467	9	0.281	6	0	0	0.705	16
novel-hsa-miR30-3p	miRNA	0	0	0	0	0	0	0	0	0	0	0.75	16	0	0	0.044	1
novel-hsa-miR300-3p	miRNA	0	0	0	0	0.176	3	0	0	0	0	0	0	0	0	0	0
novel-hsa-miR302-5p	miRNA	0	0	0	0	0.059	1	0.053	1	0	0	0.938	20	0	0	0	0
novel-hsa-miR306-3p	miRNA	0	0	0	0	0.059	1	0	0	0	0	0	0	0	0	0	0
novel-hsa-miR308-3p	miRNA	0	0	0.107	2	0	0	0	0	0	0	0	0	0	0	0	0
novel-hsa-miR309-3p	miRNA	0.099	2	0.161	3	0	0	0.16	3	0	0	0.656	14	0	0	0	0
novel-hsa-miR309-5p	miRNA	1.68	34	1.021	19	1.466	25	1.067	20	0	0	0	0	0	0	0	0
novel-hsa-miR31-3p	miRNA	0	0	0.107	2	0	0	0.107	2	0	0	0	0	0	0	0	0
novel-hsa-miR311-5p	miRNA	1.433	29	1.128	21	1.701	29	1.281	24	0	0	0	0	1.047	20	0	0
novel-hsa-miR313-3p	miRNA	1.037	21	1.236	23	1.29	22	1.281	24	0	0	1.454	31	0.943	18	0	0
novel-hsa-miR313-5p	miRNA	0	0	0.054	1	0	0	0	0	0	0	1.219	26	0	0	0	0
novel-hsa-miR315-5p	miRNA	2.075	42	1.558	29	1.466	25	1.494	28	0	0	1.36	29	1.571	30	0	0
novel-hsa-miR32-3p	miRNA	0	0	0	0	0.117	2	0.053	1	0	0	0	0	0	0	0	0
novel-hsa-miR32-5p	miRNA	0	0	0	0	0	0	0.053	1	0	0	0	0	0	0	0	0
novel-hsa-miR33-3p	miRNA	0.099	2	0.269	5	0.176	3	0.213	4	0	0	0.047	1	0	0	0	0
novel-hsa-miR35-5p	miRNA	0	0	0	0	0	0	0	0	1.452	28	3.47	74	1.047	20	0	0
novel-hsa-miR37-3p	miRNA	0.049	1	0.054	1	0.117	2	0	0	0	0	0	0	0.052	1	0	0
novel-hsa-miR38-3p	miRNA	1.186	24	0.484	9	0.645	11	0.32	6	0	0	0	0	0.471	9	0	0
novel-hsa-miR38-5p	miRNA	0.049	1	0.054	1	0	0	0.053	1	0	0	0	0	0	0	0	0
novel-hsa-miR40-3p	miRNA	0	0	0	0	0.059	1	0	0	0	0	0	0	0	0	0	0
novel-hsa-miR40-5p	miRNA	0.049	1	0	0	0	0	0.053	1	0	0	0	0	0	0	0	0
novel-hsa-miR41-3p	miRNA	0.296	6	0.215	4	0.176	3	0.107	2	0	0	0	0	0	0	0	0
novel-hsa-miR42-5p	miRNA	0	0	0.054	1	0	0	0	0	0	0	0	0	0	0	0	0
novel-hsa-miR43-5p	miRNA	0	0	0	0	0.059	1	0	0	0	0	0	0	0	0	0	0
novel-hsa-miR44-3p	miRNA	0	0	0	0	0.059	1	0	0	0	0	0	0	0	0	0	0
novel-hsa-miR45-3p	miRNA	0.642	13	0.269	5	0.117	2	0.213	4	0	0	0	0	0	0	0	0
novel-hsa-miR48-3p	miRNA	4.199	85	2.471	46	1.642	28	1.868	35	0	0	0.422	9	0.785	15	0	0
novel-hsa-miR49-3p	miRNA	0	0	0.215	4	0.293	5	0.16	3	0	0	0	0	0.89	17	0	0
novel-hsa-miR50-3p	miRNA	0	0	0	0	0.059	1	0	0	0	0	0	0	0	0	0	0
novel-hsa-miR51-3p	miRNA	0.099	2	0.215	4	0.469	8	0.32	6	0	0	0	0	0	0	0	0
novel-hsa-miR52-3p	miRNA	0.198	4	0.107	2	0.235	4	0.053	1	0	0	0	0	0	0	0	0
novel-hsa-miR52-5p	miRNA	0.049	1	0	0	0	0	0	0	0	0	0	0	0	0	0	0
novel-hsa-miR54-3p	miRNA	0.099	2	0.215	4	0.117	2	0.107	2	0	0	0	0	0	0	1.322	30
novel-hsa-miR54-5p	miRNA	9.683	196	15.85	295	14.429	246	19.584	367	0	0	0	0	0.628	12	0	0
novel-hsa-miR57-3p	miRNA	91.294	1848	68.019	1266	52.261	891	38.527	722	1.971	38	19.506	416	19.112	365	2.292	52
novel-hsa-miR58-3p	miRNA	0.445	9	0.215	4	0.411	7	0.64	12	0	0	0	0	0	0	0	0
novel-hsa-miR59-5p	miRNA	0.148	3	0.107	2	0.117	2	0	0	0	0	0	0	1.047	20	0	0
novel-hsa-miR6-3p	miRNA	0	0	0.215	4	0.235	4	0.213	4	0	0	0	0	0	0	0	0
novel-hsa-miR60-3p	miRNA	0.099	2	0.161	3	0.117	2	0.053	1	7.47	144	0.891	19	0	0	0	0
novel-hsa-miR61-3p	miRNA	0	0	0.054	1	0.059	1	0	0	0	0	0	0	0	0	0	0
novel-hsa-miR61-5p	miRNA	2.124	43	1.451	27	1.818	31	2.988	56	0	0	0	0	0.681	13	0	0
novel-hsa-miR62-3p	miRNA	0.049	1	0	0	0.059	1	0.107	2	0	0	0	0	0	0	0	0
novel-hsa-miR66-3p	miRNA	0	0	0	0	0.059	1	0	0	0	0	0	0	0	0	0	0
novel-hsa-miR66-5p	miRNA	0	0	0	0	0	0	0.374	7	0	0	0	0	0	0	0	0
novel-hsa-miR67-3p	miRNA	0	0	0	0	0	0	0	0	0	0	0	0	0	0	0.044	1
novel-hsa-miR68-3p	miRNA	0	0	0	0	0	0	0.053	1	0	0	0	0	0	0	0	0
novel-hsa-miR68-5p	miRNA	1.334	27	1.451	27	1.408	24	1.281	24	0	0	0	0	0	0	0	0
novel-hsa-miR69-3p	miRNA	0	0	0.054	1	0	0	0	0	0	0	0	0	0	0	0	0
novel-hsa-miR7-3p	miRNA	0.099	2	0.269	5	0.645	11	0.053	1	0	0	0	0	0	0	0	0
novel-hsa-miR71-3p	miRNA	0	0	0.215	4	0	0	0.16	3	0	0	0	0	0	0	0	0
novel-hsa-miR72-3p	miRNA	0	0	0.054	1	0	0	0	0	0	0	0	0	0	0	0	0
novel-hsa-miR72-5p	miRNA	0.593	12	0.322	6	0.411	7	0.267	5	0	0	0	0	0.314	6	0	0
novel-hsa-miR73-3p	miRNA	0.148	3	0.43	8	0.176	3	0.32	6	0	0	0	0	0	0	0	0
novel-hsa-miR74-5p	miRNA	0.049	1	0.054	1	0	0	0.053	1	0	0	0	0	0	0	0	0
novel-hsa-miR76-3p	miRNA	0.099	2	0.215	4	0.117	2	0.16	3	0	0	0	0	1.571	30	0	0
novel-hsa-miR77-3p	miRNA	0.099	2	0	0	0.293	5	0	0	0	0	0	0	0	0	0	0
novel-hsa-miR78-3p	miRNA	0.148	3	0	0	0	0	0.053	1	0	0	0	0	0	0	0	0
novel-hsa-miR78-5p	miRNA	0.148	3	0	0	0.117	2	0.213	4	0	0	0	0	0.628	12	0	0
novel-hsa-miR8-5p	miRNA	0.296	6	0.107	2	0	0	0.107	2	0	0	0.985	21	0	0	0	0
novel-hsa-miR80-5p	miRNA	0	0	0.054	1	0	0	0	0	0	0	1.547	33	0	0	0	0
novel-hsa-miR81-3p	miRNA	0.939	19	0.86	16	1.173	20	1.174	22	1.556	30	1.454	31	4.87	93	0.044	1
novel-hsa-miR82-3p	miRNA	0.593	12	0.967	18	0.176	3	0.8	15	0	0	0.985	21	2.304	44	0	0
novel-hsa-miR83-3p	miRNA	0.296	6	0.376	7	0.176	3	0.374	7	0	0	0	0	0	0	0	0
novel-hsa-miR83-5p	miRNA	0	0	0	0	0	0	0.32	6	0	0	0	0	0	0	0	0
novel-hsa-miR84-3p	miRNA	0.148	3	0.107	2	0	0	0	0	0	0	0	0	0.576	11	1.19	27
novel-hsa-miR85-3p	miRNA	0.593	12	0.269	5	0.352	6	0.053	1	0	0	0	0	0	0	0	0
novel-hsa-miR86-3p	miRNA	0	0	0	0	0	0	0.16	3	0	0	0	0	0	0	0	0
novel-hsa-miR87-3p	miRNA	0	0	0.054	1	0	0	0	0	0	0	0	0	0	0	0	0
novel-hsa-miR88-3p	miRNA	0	0	0.161	3	0	0	0	0	0	0	0	0	0	0	0	0
novel-hsa-miR89-5p	miRNA	0	0	0	0	0.117	2	0.107	2	0	0	0	0	0	0	0	0
novel-hsa-miR9-3p	miRNA	0.692	14	0.645	12	0.704	12	0.534	10	0.882	17	1.078	23	0.576	11	0	0
novel-hsa-miR90-3p	miRNA	0.148	3	0.107	2	0.176	3	0.107	2	0	0	0	0	0.471	9	0	0
novel-hsa-miR90-5p	miRNA	0	0	0	0	0.117	2	0	0	0	0	0	0	0	0	0	0
novel-hsa-miR91-3p	miRNA	3.063	62	4.835	90	3.402	58	2.668	50	0	0	0	0	0	0	0	0
novel-hsa-miR91-5p	miRNA	0.84	17	0.376	7	0.352	6	0.854	16	0	0	0	0	1.623	31	0	0
novel-hsa-miR92-3p	miRNA	0.247	5	0	0	0	0	0.16	3	0	0	0	0	0	0	0	0
novel-hsa-miR92-5p	miRNA	0.741	15	0.269	5	0.235	4	0.32	6	0	0	0	0	1.1	21	0	0
novel-hsa-miR93-5p	miRNA	0.049	1	0.107	2	0	0	0.053	1	0	0	0	0	0	0	0	0
novel-hsa-miR94-3p	miRNA	0	0	0	0	0	0	0.053	1	0	0	0.047	1	0	0	0	0
novel-hsa-miR95-5p	miRNA	9.436	191	8.274	154	7.508	128	8.058	151	1.297	25	3.001	64	9.059	173	1.719	39
novel-hsa-miR97-3p	miRNA	0.049	1	0	0	0.059	1	0	0	0	0	1.032	22	0	0	0	0
novel-hsa-miR97-5p	miRNA	0.593	12	0.215	4	0	0	0.16	3	0	0	0	0	0	0	0	0
novel-hsa-miR98-5p	miRNA	0	0	0.054	1	0.117	2	0	0	0	0	0	0	0	0	0	0
novel-hsa-miR99-3p	miRNA	0	0	0.054	1	0.059	1	0.053	1	0	0	0	0	0	0	0	0

## Sheet: Table S2
Table S2. Differential gene expression analysis of miRNA between rPAL labeled RNA versus the total small RNA from KG1a cells
Gene ID+A1:D2	Type	log2 (KG_cell_rPAL / KG_cell_to)	Qvalue (KG_cell_rPAL / KG_cell_to)
hsa-let-7a-2-3p	miRNA	-4.66476	0.00755417
hsa-let-7b-5p	miRNA	2.40615	1.68333e-05
hsa-let-7c-5p	miRNA	1.66466	0.0110167
hsa-let-7d-3p	miRNA	4.28285	6.1779e-22
hsa-let-7g-5p	miRNA	-1.15385	0.0397164
hsa-let-7i-3p	miRNA	-8.53573	2.49518e-10
hsa-miR-1-3p	miRNA	-1.85615	0.00374277
hsa-miR-100-3p	miRNA	-4.96296	0.000670663
hsa-miR-101-3p	miRNA	-6.54008	4.47302e-10
hsa-miR-10399-5p	miRNA	-5.03021	0.00105338
hsa-miR-103a-2-5p	miRNA	-4.58874	0.00147908
hsa-miR-106b-5p	miRNA	-5.03925	0.00147908
hsa-miR-107	miRNA	-7.15694	1.44831e-06
hsa-miR-10a-5p	miRNA	5.90285	0.0163757
hsa-miR-1180-3p	miRNA	1.93191	5.86499e-07
hsa-miR-12136	miRNA	4.71111	9.61229e-06
hsa-miR-122-5p	miRNA	7.14998	9.52997e-10
hsa-miR-1225-5p	miRNA	10.1828	0.0091928
hsa-miR-1226-3p	miRNA	2.36014	0.00580341
hsa-miR-1237-3p	miRNA	5.21989	0.00118472
hsa-miR-1243	miRNA	-4.09716	0.0193719
hsa-miR-1248	miRNA	10.9253	0.000295974
hsa-miR-125a-5p	miRNA	1.36331	0.0304858
hsa-miR-126-3p	miRNA	-2.4609	8.04593e-14
hsa-miR-126-5p	miRNA	-4.25472	1.13837e-09
hsa-miR-1260a	miRNA	4.35558	0.0197362
hsa-miR-1268a	miRNA	3.14536	6.02841e-05
hsa-miR-127-3p	miRNA	7.30287	0.0378606
hsa-miR-1275	miRNA	4.44327	3.04464e-10
hsa-miR-1277-3p	miRNA	-7.15599	3.0659e-08
hsa-miR-128-3p	miRNA	-1.35232	0.0146075
hsa-miR-1285-5p	miRNA	5.60507	0.00803832
hsa-miR-1287-3p	miRNA	-5.97156	2.79836e-05
hsa-miR-1287-5p	miRNA	-7.99119	1.03819e-09
hsa-miR-1306-5p	miRNA	3.75416	0.00147908
hsa-miR-1307-5p	miRNA	-8.9651	3.27466e-13
hsa-miR-130a-3p	miRNA	-3.71793	0.0036036
hsa-miR-130b-3p	miRNA	-8.34649	1.06916e-08
hsa-miR-130b-5p	miRNA	1.95998	0.00185855
hsa-miR-132-5p	miRNA	-3.30711	0.0298938
hsa-miR-140-5p	miRNA	-2.81596	1.06998e-06
hsa-miR-142-3p	miRNA	-4.06244	9.80481e-15
hsa-miR-142-5p	miRNA	-3.29484	2.86284e-06
hsa-miR-148a-3p	miRNA	-3.87518	0.0415355
hsa-miR-148b-3p	miRNA	-7.22148	2.67278e-08
hsa-miR-149-5p	miRNA	8.22852	0.0217109
hsa-miR-150-5p	miRNA	3.26237	4.61754e-08
hsa-miR-151a-3p	miRNA	-3.14833	0.000125571
hsa-miR-151a-5p	miRNA	-0.942833	0.0123351
hsa-miR-153-3p	miRNA	-7.31748	2.90877e-08
hsa-miR-1537-3p	miRNA	-5.49523	7.21234e-05
hsa-miR-155-3p	miRNA	-5.7322	4.04282e-05
hsa-miR-15a-3p	miRNA	-7.06593	1.99933e-10
hsa-miR-15a-5p	miRNA	-3.65798	3.55727e-08
hsa-miR-15b-5p	miRNA	-2.2458	3.7242e-06
hsa-miR-16-2-3p	miRNA	-5.62243	6.02841e-05
hsa-miR-16-5p	miRNA	-1.98481	1.0455e-10
hsa-miR-17-3p	miRNA	-4.35148	0.00755417
hsa-miR-17-5p	miRNA	-1.92214	0.000142616
hsa-miR-181a-3p	miRNA	-3.85118	3.99633e-17
hsa-miR-181a-5p	miRNA	-1.58316	0.00235371
hsa-miR-181b-2-3p	miRNA	-4.36074	0.00819979
hsa-miR-181b-5p	miRNA	-0.957156	0.00509229
hsa-miR-181d-5p	miRNA	-3.31916	0.000312382
hsa-miR-186-5p	miRNA	-3.03205	0.00171505
hsa-miR-188-5p	miRNA	-6.62992	2.57031e-07
hsa-miR-18a-5p	miRNA	-3.86652	2.82035e-28
hsa-miR-1908-5p	miRNA	5.34052	1.1891e-06
hsa-miR-191-3p	miRNA	2.29463	2.86284e-06
hsa-miR-192-5p	miRNA	-4.17268	1.58548e-07
hsa-miR-194-5p	miRNA	-3.51055	0.000156045
hsa-miR-196b-3p	miRNA	-5.94549	9.76396e-06
hsa-miR-197-3p	miRNA	2.46241	2.70086e-05
hsa-miR-199a-5p	miRNA	-3.08128	1.0917e-07
hsa-miR-199b-5p	miRNA	-5.79868	7.85218e-30
hsa-miR-19a-3p	miRNA	-8.13801	1.15123e-12
hsa-miR-19b-3p	miRNA	-7.69243	1.11692e-11
hsa-miR-200c-3p	miRNA	2.96126	0.0453095
hsa-miR-203a-3p	miRNA	-4.47919	0.01312
hsa-miR-20a-3p	miRNA	-4.46758	0.00591192
hsa-miR-20a-5p	miRNA	-4.02794	1.09926e-12
hsa-miR-21-3p	miRNA	-6.99079	3.03277e-09
hsa-miR-21-5p	miRNA	-3.58411	1.71551e-13
hsa-miR-210-3p	miRNA	-6.87086	2.18931e-05
hsa-miR-2110	miRNA	2.9118	2.32459e-05
hsa-miR-212-3p	miRNA	-4.91003	0.00225568
hsa-miR-214-3p	miRNA	2.82116	6.19725e-11
hsa-miR-218-5p	miRNA	-3.53243	1.18231e-05
hsa-miR-219b-5p	miRNA	-6.10505	6.16991e-06
hsa-miR-22-3p	miRNA	-3.11053	0.00116057
hsa-miR-22-5p	miRNA	-4.45821	0.00555918
hsa-miR-221-3p	miRNA	-2.63428	7.32629e-19
hsa-miR-221-5p	miRNA	-4.75501	0.00214755
hsa-miR-222-3p	miRNA	1.93006	0.000147371
hsa-miR-223-3p	miRNA	-3.76993	7.41659e-14
hsa-miR-223-5p	miRNA	-2.70199	0.0091928
hsa-miR-2277-5p	miRNA	-3.90737	0.0453479
hsa-miR-24-2-5p	miRNA	-3.79121	0.0477156
hsa-miR-24-3p	miRNA	-1.38965	0.0010613
hsa-miR-25-3p	miRNA	-1.97665	0.0120922
hsa-miR-25-5p	miRNA	2.85992	0.00381251
hsa-miR-27a-3p	miRNA	-4.89542	1.97743e-53
hsa-miR-27a-5p	miRNA	2.07887	0.000262464
hsa-miR-27b-3p	miRNA	-4.51977	7.43217e-05
hsa-miR-29a-3p	miRNA	-5.6553	4.86148e-09
hsa-miR-29a-5p	miRNA	-4.47913	0.00509229
hsa-miR-29b-3p	miRNA	-9.3288	6.87676e-28
hsa-miR-29c-3p	miRNA	-6.24868	1.33591e-09
hsa-miR-301a-3p	miRNA	-5.14685	7.21044e-07
hsa-miR-301a-5p	miRNA	-6.82897	9.6372e-08
hsa-miR-301b-3p	miRNA	-9.82355	7.73444e-19
hsa-miR-3074-3p	miRNA	-3.28457	0.0399626
hsa-miR-3074-5p	miRNA	-1.86009	0.000147371
hsa-miR-30b-3p	miRNA	1.84405	0.0116086
hsa-miR-30b-5p	miRNA	-2.08403	1.03857e-06
hsa-miR-30d-3p	miRNA	-5.38124	7.95916e-05
hsa-miR-30d-5p	miRNA	-1.73414	7.91591e-06
hsa-miR-30e-5p	miRNA	-7.37033	6.84807e-08
hsa-miR-3150b-3p	miRNA	6.37403	0.00479731
hsa-miR-3151-5p	miRNA	3.35144	0.0162236
hsa-miR-3177-3p	miRNA	5.75837	0.0431193
hsa-miR-3180	miRNA	5.52898	0.0120213
hsa-miR-3187-3p	miRNA	2.17525	4.66193e-07
hsa-miR-3194-3p	miRNA	-7.40624	1.47862e-07
hsa-miR-32-3p	miRNA	-4.00091	0.0342359
hsa-miR-32-5p	miRNA	-9.25745	5.89303e-36
hsa-miR-320c	miRNA	2.47231	0.000912127
hsa-miR-320d	miRNA	4.58596	0.000429231
hsa-miR-328-3p	miRNA	3.49095	1.40571e-11
hsa-miR-330-5p	miRNA	-6.55662	5.74608e-07
hsa-miR-331-3p	miRNA	-2.89867	2.97431e-05
hsa-miR-335-5p	miRNA	-5.32741	3.97518e-05
hsa-miR-339-5p	miRNA	-3.25869	0.00182006
hsa-miR-33a-5p	miRNA	-8.40998	3.22817e-12
hsa-miR-340-5p	miRNA	-4.20836	2.22811e-05
hsa-miR-342-5p	miRNA	4.21063	1.10349e-17
hsa-miR-34a-5p	miRNA	4.18275	0.000868802
hsa-miR-3605-3p	miRNA	4.32295	5.76422e-05
hsa-miR-3613-5p	miRNA	-4.02883	8.19746e-11
hsa-miR-3615	miRNA	2.70293	0.00370135
hsa-miR-3662	miRNA	-5.18876	0.0010613
hsa-miR-374a-3p	miRNA	-5.68996	0.00054027
hsa-miR-374a-5p	miRNA	-9.61843	5.33097e-15
hsa-miR-374b-3p	miRNA	-4.98616	0.000382464
hsa-miR-378a-3p	miRNA	-1.51172	2.34914e-05
hsa-miR-3912-3p	miRNA	-7.87446	1.31601e-09
hsa-miR-3913-3p	miRNA	-4.14372	0.0384095
hsa-miR-3939	miRNA	-4.56054	0.00743713
hsa-miR-3940-3p	miRNA	2.99143	0.0043902
hsa-miR-424-5p	miRNA	-4.97867	7.32276e-06
hsa-miR-425-5p	miRNA	-2.06456	3.46135e-07
hsa-miR-4446-3p	miRNA	5.11122	0.04025
hsa-miR-4454	miRNA	5.58361	2.10187e-06
hsa-miR-4473	miRNA	-5.05331	0.00152192
hsa-miR-4474-3p	miRNA	-3.93428	0.0301439
hsa-miR-4479	miRNA	-3.49468	0.0260434
hsa-miR-4484	miRNA	-4.42922	0.00636237
hsa-miR-449a	miRNA	-3.30517	0.0010613
hsa-miR-450a-5p	miRNA	-5.1268	1.36714e-06
hsa-miR-450b-5p	miRNA	-5.00942	2.37802e-05
hsa-miR-4518	miRNA	-4.99947	0.00183185
hsa-miR-451a	miRNA	4.25938	8.98409e-05
hsa-miR-4521	miRNA	-2.95774	0.00014631
hsa-miR-4685-3p	miRNA	5.32213	1.05164e-08
hsa-miR-4732-3p	miRNA	3.65135	0.0477156
hsa-miR-4772-5p	miRNA	-6.97281	3.30768e-08
hsa-miR-486-5p	miRNA	3.74404	0.0186988
hsa-miR-491-5p	miRNA	-3.00296	0.0010613
hsa-miR-499a-5p	miRNA	-4.21245	0.00384173
hsa-miR-500a-3p	miRNA	-3.90608	0.0270475
hsa-miR-500a-5p	miRNA	-5.28966	0.00143013
hsa-miR-501-5p	miRNA	-4.41932	0.0110025
hsa-miR-5010-3p	miRNA	2.5967	0.00771162
hsa-miR-502-3p	miRNA	-4.2039	0.0168491
hsa-miR-503-5p	miRNA	-7.20253	1.38306e-08
hsa-miR-505-5p	miRNA	2.09136	0.0420003
hsa-miR-532-3p	miRNA	-3.42321	0.0319868
hsa-miR-532-5p	miRNA	-3.61927	1.29776e-05
hsa-miR-542-3p	miRNA	-3.77613	0.0477156
hsa-miR-542-5p	miRNA	-5.00053	6.05903e-06
hsa-miR-548aq-3p	miRNA	-5.88403	5.76422e-05
hsa-miR-548ay-5p	miRNA	-5.68342	4.98532e-05
hsa-miR-548b-3p	miRNA	-5.38857	0.000279803
hsa-miR-548b-5p	miRNA	-4.28026	0.0188251
hsa-miR-548d-5p	miRNA	-6.94634	5.66392e-07
hsa-miR-548j-5p	miRNA	-6.22661	5.73086e-06
hsa-miR-548k	miRNA	-4.42629	1.55758e-05
hsa-miR-548l	miRNA	-5.6773	6.38704e-06
hsa-miR-551b-3p	miRNA	-4.09034	0.0213277
hsa-miR-5690	miRNA	6.17944	0.00711127
hsa-miR-570-3p	miRNA	-4.99988	0.00136278
hsa-miR-576-5p	miRNA	1.84219	0.000129801
hsa-miR-579-3p	miRNA	-4.93478	0.00114691
hsa-miR-582-5p	miRNA	-4.39748	0.0214249
hsa-miR-590-3p	miRNA	-5.56243	2.56409e-11
hsa-miR-590-5p	miRNA	-5.47495	0.000186196
hsa-miR-624-5p	miRNA	-3.64454	0.0453095
hsa-miR-625-5p	miRNA	3.07383	9.5761e-21
hsa-miR-641	miRNA	-5.94313	3.08756e-05
hsa-miR-6502-5p	miRNA	-4.74792	0.00255168
hsa-miR-651-5p	miRNA	-7.90249	6.24515e-16
hsa-miR-6511a-3p	miRNA	4.03595	0.00214755
hsa-miR-6511b-3p	miRNA	3.71279	2.59962e-05
hsa-miR-652-5p	miRNA	-7.57948	7.42884e-09
hsa-miR-6731-3p	miRNA	4.44281	0.0372105
hsa-miR-6734-3p	miRNA	7.15552	0.0199702
hsa-miR-6749-3p	miRNA	4.3227	1.26982e-06
hsa-miR-6789-3p	miRNA	3.82664	0.0170276
hsa-miR-6801-5p	miRNA	7.5228	0.0286531
hsa-miR-6803-3p	miRNA	3.13136	0.000380494
hsa-miR-6804-5p	miRNA	4.05336	0.00383252
hsa-miR-6820-5p	miRNA	7.10601	0.0199702
hsa-miR-6855-5p	miRNA	4.42782	0.0230323
hsa-miR-6895-5p	miRNA	9.0198	0.0427871
hsa-miR-766-3p	miRNA	2.66314	1.18953e-11
hsa-miR-766-5p	miRNA	2.74936	0.0206086
hsa-miR-7704	miRNA	4.26404	0.000487176
hsa-miR-7705	miRNA	-4.65564	0.000740683
hsa-miR-7977	miRNA	5.14085	1.57286e-05
hsa-miR-876-3p	miRNA	-5.4623	7.99776e-05
hsa-miR-877-3p	miRNA	4.35867	0.000432771
hsa-miR-9-3p	miRNA	-4.20646	0.0157824
hsa-miR-92a-1-5p	miRNA	3.47221	2.50537e-12
hsa-miR-92a-3p	miRNA	1.95922	0.000147371
hsa-miR-92b-3p	miRNA	4.1193	1.28199e-06
hsa-miR-93-5p	miRNA	-1.84084	5.74608e-07
hsa-miR-941	miRNA	-2.20528	1.48781e-08
hsa-miR-942-5p	miRNA	1.18847	0.0026444
hsa-miR-99a-3p	miRNA	-4.78874	0.00133899
hsa-miR-99a-5p	miRNA	-3.10102	2.9634e-15
hsa-miR-99b-5p	miRNA	1.81532	0.000156045
novel-hsa-miR100-5p	miRNA	7.67281	9.62644e-07
novel-hsa-miR110-3p	miRNA	6.49033	0.00194658
novel-hsa-miR115-3p	miRNA	5.6382	1.21647e-05
novel-hsa-miR115-5p	miRNA	3.96894	8.72909e-06
novel-hsa-miR121-5p	miRNA	3.55453	2.90877e-08
novel-hsa-miR130-3p	miRNA	-3.95831	0.0265875
novel-hsa-miR133-3p	miRNA	-3.81604	0.00239437
novel-hsa-miR14-5p	miRNA	8.56952	5.14144e-05
novel-hsa-miR145-3p	miRNA	5.04791	0.0340036
novel-hsa-miR146-3p	miRNA	8.85212	0.000756564
novel-hsa-miR148-3p	miRNA	5.11022	0.00440057
novel-hsa-miR188-5p	miRNA	6.72628	5.64539e-07
novel-hsa-miR189-5p	miRNA	8.5407	1.86129e-16
novel-hsa-miR191-3p	miRNA	-4.31344	0.00743713
novel-hsa-miR193-5p	miRNA	5.49657	9.18645e-05
novel-hsa-miR199-5p	miRNA	3.2612	0.000348759
novel-hsa-miR20-5p	miRNA	4.80045	0.0490649
novel-hsa-miR200-5p	miRNA	-6.14571	2.99285e-05
novel-hsa-miR239-5p	miRNA	6.61773	0.00100111
novel-hsa-miR243-5p	miRNA	7.25219	0.0321273
novel-hsa-miR245-5p	miRNA	4.0941	0.0453095
novel-hsa-miR255-5p	miRNA	8.06532	6.16991e-06
novel-hsa-miR260-5p	miRNA	6.99764	2.48171e-09
novel-hsa-miR261-5p	miRNA	-8.42388	5.13355e-11
novel-hsa-miR264-3p	miRNA	5.45862	1.3775e-08
novel-hsa-miR274-3p	miRNA	8.05499	0.00035561
novel-hsa-miR283-5p	miRNA	7.82952	0.00936088
novel-hsa-miR284-3p	miRNA	3.95604	0.0123351
novel-hsa-miR285-5p	miRNA	6.07348	3.30768e-08
novel-hsa-miR286-3p	miRNA	5.95214	3.60854e-09
novel-hsa-miR293-5p	miRNA	7.33119	0.0165476
novel-hsa-miR299-5p	miRNA	5.82405	0.00597086
novel-hsa-miR309-5p	miRNA	-4.49148	0.00483184
novel-hsa-miR35-5p	miRNA	9.28609	1.66914e-06
novel-hsa-miR54-3p	miRNA	6.36901	0.0199702
novel-hsa-miR54-5p	miRNA	-4.91094	0.000475756
novel-hsa-miR60-3p	miRNA	7.3816	0.000493643
novel-hsa-miR68-5p	miRNA	-4.56089	0.00300558
novel-hsa-miR81-3p	miRNA	2.94433	0.000414796
novel-hsa-miR84-3p	miRNA	7.34922	0.00780291
novel-hsa-miR9-3p	miRNA	2.29546	0.0385
novel-hsa-miR91-3p	miRNA	-5.92004	2.18931e-05

## Sheet: Table S3
Table S3. Potential glyco-miRNAs identified by small RNA sequencing
Gene ID	log2 (KG1a_rPAL / KG1a_input)	q-value
hsa-let-7b-5p	2.40615	1.68e-05
hsa-let-7c-5p	1.66466	0.0110167
hsa-let-7d-3p	4.28285	6.18e-22
hsa-miR-10a-5p	5.90285	0.0163757
hsa-miR-1180-3p	1.93191	5.86e-07
hsa-miR-12136	4.71111	9.61e-06
hsa-miR-122-5p	7.14998	9.53e-10
hsa-miR-1225-5p	10.1828	0.0091928
hsa-miR-1226-3p	2.36014	0.00580341
hsa-miR-1237-3p	5.21989	0.00118472
hsa-miR-1248	10.9253	0.000296
hsa-miR-125a-5p	1.36331	0.0304858
hsa-miR-1260a	4.35558	0.0197362
hsa-miR-1268a	3.14536	6.03e-05
hsa-miR-127-3p	7.30287	0.0378606
hsa-miR-1275	4.44327	3.04e-10
hsa-miR-1285-5p	5.60507	0.00803832
hsa-miR-1306-5p	3.75416	0.00147908
hsa-miR-130b-5p	1.95998	0.00185855
hsa-miR-149-5p	8.22852	0.0217109
hsa-miR-150-5p	3.26237	4.62e-08
hsa-miR-1908-5p	5.34052	1.19e-06
hsa-miR-191-3p	2.29463	2.86e-06
hsa-miR-197-3p	2.46241	2.7e-05
hsa-miR-200c-3p	2.96126	0.0453095
hsa-miR-2110	2.9118	2.32e-05
hsa-miR-214-3p	2.82116	6.2e-11
hsa-miR-222-3p	1.93006	0.000147
hsa-miR-25-5p	2.85992	0.00381251
hsa-miR-27a-5p	2.07887	0.000262
hsa-miR-30b-3p	1.84405	0.0116086
hsa-miR-3150b-3p	6.37403	0.00479731
hsa-miR-3151-5p	3.35144	0.0162236
hsa-miR-3177-3p	5.75837	0.0431193
hsa-miR-3180	5.52898	0.0120213
hsa-miR-3187-3p	2.17525	4.66e-07
hsa-miR-320c	2.47231	0.000912
hsa-miR-320d	4.58596	0.000429
hsa-miR-328-3p	3.49095	1.41e-11
hsa-miR-342-5p	4.21063	1.1e-17
hsa-miR-34a-5p	4.18275	0.000869
hsa-miR-3605-3p	4.32295	5.76e-05
hsa-miR-3615	2.70293	0.00370135
hsa-miR-3940-3p	2.99143	0.0043902
hsa-miR-4446-3p	5.11122	0.04025
hsa-miR-4454	5.58361	2.1e-06
hsa-miR-451a	4.25938	8.98e-05
hsa-miR-4685-3p	5.32213	1.05e-08
hsa-miR-4732-3p	3.65135	0.0477156
hsa-miR-486-5p	3.74404	0.0186988
hsa-miR-5010-3p	2.5967	0.00771162
hsa-miR-505-5p	2.09136	0.0420003
hsa-miR-5690	6.17944	0.00711127
hsa-miR-576-5p	1.84219	0.00013
hsa-miR-625-5p	3.07383	9.58e-21
hsa-miR-6511a-3p	4.03595	0.00214756
hsa-miR-6511b-3p	3.71279	2.6e-05
hsa-miR-6731-3p	4.44281	0.0372105
hsa-miR-6734-3p	7.15552	0.0199702
hsa-miR-6749-3p	4.3227	1.27e-06
hsa-miR-6789-3p	3.82664	0.0170276
hsa-miR-6801-5p	7.5228	0.0286531
hsa-miR-6803-3p	3.13136	0.00038
hsa-miR-6804-5p	4.05336	0.00383252
hsa-miR-6820-5p	7.10601	0.0199702
hsa-miR-6855-5p	4.42782	0.0230323
hsa-miR-6895-5p	9.0198	0.0427871
hsa-miR-766-3p	2.66314	1.19e-11
hsa-miR-766-5p	2.74936	0.0206086
hsa-miR-7704	4.26404	0.000487
hsa-miR-7977	5.14085	1.57e-05
hsa-miR-877-3p	4.35867	0.000433
hsa-miR-92a-1-5p	3.47221	2.51e-12
hsa-miR-92a-3p	1.95922	0.000147
hsa-miR-92b-3p	4.1193	1.28e-06
hsa-miR-942-5p	1.18847	0.0026444
hsa-miR-99b-5p	1.81532	0.000156
novel-hsa-miR100-5p	7.67281	9.63e-07
novel-hsa-miR110-3p	6.49033	0.00194658
novel-hsa-miR115-3p	5.6382	1.22e-05
novel-hsa-miR115-5p	3.96894	8.73e-06
novel-hsa-miR121-5p	3.55453	2.91e-08
novel-hsa-miR14-5p	8.56952	5.14e-05
novel-hsa-miR145-3p	5.04791	0.0340036
novel-hsa-miR146-3p	8.85212	0.000757
novel-hsa-miR148-3p	5.11022	0.00440058
novel-hsa-miR188-5p	6.72628	5.65e-07
novel-hsa-miR189-5p	8.5407	1.86e-16
novel-hsa-miR193-5p	5.49657	9.19e-05
novel-hsa-miR199-5p	3.2612	0.000349
novel-hsa-miR20-5p	4.80045	0.0490649
novel-hsa-miR239-5p	6.61773	0.00100111
novel-hsa-miR243-5p	7.25219	0.0321273
novel-hsa-miR245-5p	4.0941	0.0453095
novel-hsa-miR255-5p	8.06532	6.17e-06
novel-hsa-miR260-5p	6.99764	2.48e-09
novel-hsa-miR264-3p	5.45862	1.38e-08
novel-hsa-miR274-3p	8.05499	0.000356
novel-hsa-miR283-5p	7.82952	0.00936088
novel-hsa-miR284-3p	3.95604	0.0123351
novel-hsa-miR285-5p	6.07348	3.31e-08
novel-hsa-miR286-3p	5.95214	3.61e-09
novel-hsa-miR293-5p	7.33119	0.0165476
novel-hsa-miR299-5p	5.82405	0.00597086
novel-hsa-miR35-5p	9.28609	1.67e-06
novel-hsa-miR54-3p	6.36901	0.0199702
novel-hsa-miR60-3p	7.3816	0.000494
novel-hsa-miR81-3p	2.94433	0.000415
novel-hsa-miR84-3p	7.34922	0.00780291
novel-hsa-miR9-3p	2.29546	0.0385
